1           **Organogenesis and Vasculature of *Anaxagorea* and its Implications for the**  
2                           **Integrated Axial-Foliar Origin of Angiosperm Carpel**

3

4   Ya Li,<sup>1,†</sup> Wei Du,<sup>1,†</sup> Shuai Wang,<sup>2</sup> Xiao-Fan Wang<sup>1,\*</sup>

5   1 College of Life Sciences, Wuhan University, Wuhan 430072, China

6   2 College of Life Sciences and Environment, Hengyang Normal University,  
7   Hengyang 421001, China

8   \*Author for correspondence. E-mail: wangxf@whu.edu.cn

9   † Both authors contribute equally to this work

10

11   Running Title: The Axial-Foliar Origin of Carpel

12

13 **Abstract**

14 The carpel is the definitive structure of angiosperms, the origin of carpel is of great  
15 significance to the phylogenetic origin of angiosperms. Traditional view was that  
16 angiosperm carpels were derived from structures similar to macrosporophylls of  
17 pteridosperms or Bennettitales, which bear ovules on the surfaces of foliar organs. In  
18 contrast, other views indicate that carpels are originated from the foliar appendage  
19 enclosing the ovule-bearing axis. One of the key differences between these two  
20 conflicting ideas lies in whether the ovular axis is involved in the evolution of carpel.  
21 The aim of this paper is to investigate whether the axial homologs remain in the  
22 carpel of extant angiosperms, and thereby to prove the carpel is integrated axial-foliar  
23 originated. Two *Anaxagorea* species was used for organogenesis and comparative  
24 anatomical study due to its outstanding and unusually long carpel stipe. The  
25 continuous change of vascular bundles at carpel stipe in different developmental  
26 stages was described in detail. Organogenesis study shows that the carpel stipe of  
27 *Anaxagorea* occurs at the early stage of carpel development. Vascular bundles at the  
28 base of *Anaxagorea* carpel are a set of discrete ring-arranged collateral bundles  
29 (RACBs), which branch out at the upper portion into two sets of RACBs below each  
30 ovule. The ring-arranged collateral bundles indicates a clear morphological evidence  
31 for the existence of the axial homologs in the carpel and thus support the idea that  
32 carpels originated from the integration of the ovular axis and foliar parts. This finding  
33 may also promote reconsiderations of the phylogenetic relationship between  
34 angiosperms, gnetophytes and Cordaitales.

35

36 **Key words:** *Anaxagorea*; axial homologs; carpel; organogenesis; origin of  
37 angiosperms; vascular anatomy.

## 38 INTRODUCTION

39 Angiosperms—the flowering plants— make up much of the visible world of modern  
40 plants. Both the beautiful flowers and the delicious fruits are closely related to human  
41 life. The name “angiosperm” is derived from the Greek words angeion, meaning  
42 “container,” and sperma, meaning “seed.” Therefore, the carpel, a “seeds container”, is  
43 the definitive structure of angiosperms. The carpel is an angiosperm-specific female  
44 reproductive feature in flowers and is the basic unit of the gynoecium, which  
45 protectively surrounds the ovules by closure and sealing along their rims or flanks  
46 (Dunal, 1817; Robinson-Beers, 1992; Endress, 2015). The evolution of the carpel set  
47 angiosperms apart from other seed plants, which developed ovules that are exposed to  
48 the air. Since the time of Darwin, elucidating the origin of angiosperms and their  
49 evolutionary success represents a primary goal in plant science. Scientists have  
50 attempted to search for possible ancestors of angiosperms through phylogenetic  
51 analysis based on fossil, morphological, and molecular data. In these efforts,  
52 particular emphasis has been placed on assessing which the ovule-bearing structures  
53 of various seed plants could be transformed into a carpel.

54  
55 The history of exploring the origin of carpel has been tortuous. Competing theories of  
56 flower origins provide differing explanations and shaped different hypotheses on the  
57 phylogenetic relationships among angiosperms and other seed plant lineages. The  
58 traditional phyllosporous origin hypothesis suggests that angiosperm carpels were  
59 derived from structures similar to macrosporophylls of Bennettitales, which bear  
60 ovules on the margins of foliar organs (Arber and Parkin, 1907; Eyde, 1975;  
61 Cronquist, 1988; Takhtajan, 1991). Alternatively, the stachyosporous origin theories  
62 suggest that the carpel is originated from a compound shoot with the integration of the  
63 ovular axis and foliar appendage, the placenta with ovules in the carpel is homologous  
64 with a female short-shoot of gymnosperms with distally placed ovules, each with  
65 scales forming the outer integument (Stebbins, 1974; Retallack and Dilcher, 1981;  
66 Crane, 1985; Doyle and Donoghue, 1986; Nixon *et al.*, 1994; Hickey and Taylor,  
67 1996; Wang, 2010, 2018). The Caytonialean hypothesis holds that the cupule wall of  
68 seed ferns provides a homolog for the outer integument of angiosperm ovule and that  
69 expansion and folding of the cupule-bearing axis became the progenitor of the carpel  
70 (Doyle, 1978, 2006, 2008). And in still another fashion, the carpel has evolved by  
71 ectopic expression of ovules on a phyllome (e.g., the Mostly Male theory [Frohlich  
72 and Parker, 2000]).

73  
74 However, since the sister group of the angiosperms is unknown, the origin of carpel is  
75 still enigmatic. Progress has been made in the study of morphology and functional  
76 genes among angiosperms. The placenta and ovary wall of angiosperms were  
77 respectively served by independent vascular bundles (Guo *et al.*, 2013; Liu *et al.*,  
78 2014; Guo *et al.*, 2017; Zhang *et al.*, 2017), and were controlled by different genes  
79 that the corresponding to a branch organ and a leaf organ respectively (Roe *et al.*,1997;  
80 Skinner *et al.*,2004; Mathews and Kramer, 2012). In distributed lines of angiosperms,  
81 the ovule primordium originates in the axillary position between the flower axis and  
82 carpel wall (e.g., *Gyrostemon* [Hufford, 1996]; *Illicium* [Zhang *et al.*, 2019];

83 *Phytolacca* [Zhang et al., 2018]). These are necessary clues for the carpel if the  
84 placenta and the carpel wall have different evolutionary origins, but more solid  
85 evidence is still lacking. According to the above-mentioned hypotheses, it is critical to  
86 find clear evidences for the existence of axial homologs in the carpel for the origin of  
87 angiosperms. Following the logic that there is no doubt the carpel wall is derived from  
88 foliar homologs, as long as the axial homologs in the carpel are determined, the carpel  
89 should rather derived from an ovule-bearing axis fused with the leaf-like structure  
90 than derived from the megasporophyll.

91  
92 To find a more dependable evidence for the existence of axial homologs, the carpel of  
93 *Anaxagorea* (Annonaceae) was selected for organogenesis and vascular anatomic  
94 examination. Annonaceae are one of the largest families of Magnoliales, which is one  
95 of the most important lineages in the early radiation of angiosperms (Sauquet et al.,  
96 2003). *Anaxagorea* is phylogenetically the most basal genus in Annonaceae (Doyle  
97 and le Thomas, 1996; Doyle et al., 2004; Chatrou et al., 2012; Chatrou et al., 2018),  
98 which live in dimly-lit riparian zones in forest slope understory habitats. In this genus,  
99 plants have simple leaves that are alternately arranged in two rows along the stems  
100 and the flowers usually have whorled phyllotaxis. Gynoecium are apocarpous (free  
101 carpels) throughout the life history (Deroin, 1988). Each carpel of *Anaxagorea* has a  
102 notable long stipe (Endress and Armstrong, 2011), which is one of the important  
103 characteristics of the genus. Our investigation is based on the considerations that  
104 morphological features shared by *Anaxagorea* are relatively primitive in angiosperms,  
105 and the presence of the notable carpel stipe makes it possible to determine whether  
106 there are “axial homologs” in the carpel through tissue sectioning.

107

## 108 **MATERIALS AND METHODS**

### 109 **Study Species and Sites**

110 Flower samples of *Anaxagorea luzonensis* and *Anaxagorea javanica* were collected in  
111 July 2017 at the Diaoluo Mountain (Hainan, China) and Xishuangbanna Tropical  
112 Botanical Garden (Yunnan, China), respectively. The former usually has two to four  
113 carpels, whereas the latter has a multicarpellate gynoecium.

114

### 115 **SEM and Paraffin Slices**

116 Flower samples were collected at different floral stages (from early bud to young  
117 fruit). Gynoeciums were isolated from the other parts of the flower and preserved in  
118 formalin–acetic acid–70% alcohol (5:5:90, v/v). The fixed material was dehydrated  
119 through a series of alcohol solutions ranging from 50% to 100%. To delineate the  
120 structure and development of carpel, some carpels were removed from the  
121 gynoeciums and passed through an iso-pentanol acetate series (SCR, Shanghai,  
122 China), and then critically point-dried, sputter-coated with gold, and were observed  
123 and photographed using a scanning electron microscope (Tescan VEGA-3-LMU,  
124 Brno, Czech). To illustrate the vasculature of carpel, some carpels were embedded in  
125 paraffin, sectioned serially into sections of 10- to 12- $\mu$ m thickness, and then stained  
126 with Safranin O and Fast Green. Complete transverse and longitudinal series were  
127 examined and photographed under a light microscope (Olympus BX-43-U, Tokyo,

128 Japan) and bright field optics.

129

## 130 **RESULTS**

### 131 **Carpel Organogenesis**

132 In *A. luzonensis* and *A. javanica*, carpels are free from each other completely (**Figures**  
133 **1G, 2A**). Each carpel consists of a plicate zone (**Figures 1G, 3B–H**), a very short  
134 ascidiate zone (**Figure 2C**), and a conspicuous long stipe (**Figures 1G, 3I–M**). Carpel  
135 primordia are approximately hemispherically initiated (**Figure 1A**). Carpel stipe  
136 forms early at the basal part in the early stage of carpel development (**Figures 1C, J**),  
137 remains elongate, takes up roughly a quarter length of the carpel at anthesis (**Figure**  
138 **1G**), and continues to elongate during the fruit-stage. Continuous growth of the flanks  
139 on the ventral side of the young carpel raises the early closure. The closure does not  
140 extend to the bottom of the carpel (**Figure 1D**). Subsequently, the dorsal part of each  
141 carpel notably thickens and the stigma forms (**Figures 1E, F**). At anthesis, carpels are  
142 widest at the basal part, with an arch on abaxial side (**Figure 1G**). Each carpel has  
143 two lateral ovules with the placentae at the base of the ovary (**Figures 2F, M, 3A**).

144

### 145 **Carpel Vasculature**

146 Main vascular bundles of *Anaxagorea* carpel are distinct as a dorsal bundle, a pair of  
147 ventral bundles, a pair of ovule bundles, and several lateral bundles (**Figures 2F, M,**  
148 **3A, F**). Vascular system here are described from the base up to the carpel for easier  
149 comprehension of vascular transformation according to the schematic (**Figure 3**). At  
150 the base of each carpel stipe, discrete collateral (a collateral bundle has adaxial xylem  
151 and abaxial phloem) bundles form a ring (hereinafter abbreviated as ring-arranged  
152 collateral bundles, RACBs) around the pith-like cell groups (**Figures 2A, I, 3M**). At  
153 the slightly upper part of the carpel stipe, those discrete bundles tend to join adjacent  
154 bundles in phloem (**Figure 3L**), subsequently separate, and finally are gathered into  
155 three groups: a dorsal bundle and two sets of lateral bundle complexes (LBCs, **Figure**  
156 **3K**). Each set of LBCs is assembled into an amphicribal (an amphicribal bundle has  
157 its xylem surrounded by the phloem) bundle in the young carpel (**Figure 2B**). While  
158 in the mature carpel, each set of LBCs is assembled as a set of RACBs, and thus there  
159 are two sets of RACBs in one carpel (**Figures 2E, K, 3J**). Below each placenta, each  
160 set of RACBs (or amphicribal bundle) is transformed to a set of “C”-shaped bundle  
161 complexes (CBCs), from which several collateral bundles separate from each set of  
162 CBCs, and merge with each other to form an amphicribal bundle, which is kept  
163 separate from other bundles (**Figures 2C, L, 3G–I**). Each set of CBCs allocates an  
164 ovule bundle into each ovule and other bundles into the carpel wall, where the ventral  
165 bundles are also separated (**Figures 2D, F, M, 3E–F**). On the cross section of the  
166 ovary locule, both ventral bundles and ovule bundles are amphicribal (**Figures 2G,**  
167 **H**). In the carpel wall, lateral bundles present as pinnate arranged collateral bundles,  
168 which are connected to form meshy complexes by poorly-differentiated strands  
169 (**Figures 2M, 3D, E**). The dorsal bundle is also connected with lateral bundles by  
170 poorly-differentiated strands (**Figures 2D, 3F**). Upon the ovule locule, bundles in the  
171 carpel wall join each other with xylem and phloem and finally diminish (**Figures 3B,**

172 C).

173

## 174 **DISCUSSION**

175 This study firstly investigated the organogenesis and the changes of vascular bundle in  
176 different development stages of the carpel stipe of *Anaxagorea*. The special  
177 arrangement of vascular bundles in the carpel stipe of *Anaxagorea* suggests that there  
178 are homologous structures of ovule axis exist in the carpels of modern angiosperms  
179 and constitutes an essential step to understand how the carpels evolved from female  
180 reproductive secondary shoot and the sterile bract.

181

182 It has been suggested that peltate carpels is plesiomorphic in Annonaceae (Deroin,  
183 1988; Igersheim and Endress, 1997; Surveswaran et al., 2010; Couvreur et al., 2011).  
184 Carpels of *Anaxagorea* has been reported to have a short ascidiate zone in some  
185 studies (Deroin, 1988), while are completely plicate in others (Endress and Armstrong,  
186 2011). In the present study, organogenesis shows that the carpel stipe of *A. luzonensis*  
187 and *A. javanica* occurs at the early stage of carpel development and continues to  
188 elongate with the development of the carpel. It is different from the mericarp stipes of  
189 other Annonaceae plants, the latter of which has the ovuliferous upper ovary parts are  
190 built firstly, then sterile lower stipes evolve divergent latter (e.g., *Cananga*, *Uvari*,  
191 *Xylopia* [Deroin, 1999]). In flower stage, the ventral slit may continue for some  
192 distance along the ovule locule and terminated very close to the base of ovule locule.  
193 These variants of may suggest the transformation from peltate carpels to plicate  
194 carpels. The carpel stipe in *Anaxagorea* provides a buffer space for the drastic  
195 changes in structure of the vascular bundle at the base of carpel, whereas in most  
196 angiosperms with apocarpy, the base of the carpel is very close to the placenta and the  
197 vascular bundle in this part tends to be simplified (e.g., *Michelia* [Tucker, 1961];  
198 *Sagittaria* [Kaul, 1967]; *Drimys* [Tucker, 1975]; *Illicium* [Robertson and Tucker,  
199 1979]; *Brasenia* [Endress, 2005]).

200

201 In Annonaceae, it has been recognized that the distal parts of the cortical vascular  
202 system are used up in the formation of carpel traces, three to each carpel (Eames,  
203 1961). However, in *A. luzonensis* and *A. javanica*, the number of vascular bundles  
204 entering the carpel is far more than three, and arranged in a radiosymmetric pattern.  
205 Radiosymmetric vasculature possessed universality in the stems of vascular plants  
206 (Metcalf and Chalk, 1979; Evert, 2006; Beck, 2010; McKown and Dengler, 2010;  
207 Evert and Eichhorn, 2011). On the cross section of the stem in most angiosperms  
208 other than monocots, discrete collateral bundles form a single ring or a continuous  
209 hollow cylinder around the pith (e.g., Caprifoliaceae; Leguminosae; Tiliaceae;  
210 Ulmaceae). While the in the leaves, vascular distribution are lateral organized in most  
211 seed plants, a largest collateral bundle often extends along the long axis of the leaf as  
212 a midvein, from which smaller veins diverge laterally (e.g., Pinaceae; Gnetaceae;  
213 Magnoliaceae; Gramineae; Brassicaceae), even in the branching veins in *Ginkgo*, each  
214 of the veins is a single collateral bundle. In the cross sections of the carpel of  
215 *Anaxagorea*, the RACBs at the basal part acts in accordance with a typical form of the

216 stem vascular anatomy of most angiosperms. In the distal region, a dorsal bundle  
217 separated from the basal RACBs, and the remainder gathered into two sets of  
218 amphicribal bundles below each placenta, which are developed into two sets of  
219 RACBs in the more mature carpel. This vasculature transition may be an important  
220 indication that (1) the basal part of the *Anaxagorea* carpel stipe is an axial homolog in  
221 nature, and (2) the carpel is integrated axial-foliar originated from the ovular axis with  
222 its bract. The branching of RACBs in each carpel seems to be an evidence for the  
223 existence of axial homologs in the carpel because the foliar homologs (lateral organs)  
224 cannot form such a topology by coiling transformation since the topological structure  
225 of the lateral organized bundles is equivalent to a curve, and the curved surface can  
226 only form a one-way tunnel (like macaroni pasta) by coiling. However, the branching  
227 RACBs (one set of RACBs branch into two sets of RACBs) in the carpel of  
228 *Anaxagorea* are equivalent to a three-way tunnel.

229  
230 Development of amphicribal bundles into RACBs was observed in the carpel of *A.*  
231 *luzonensis* at different stages. The ovule bundles are also appeared amphicribal,  
232 which is separated from the CBCs directly. Amphicribal bundles are frequently seen  
233 in small branches of early land plants, in monocots, or in young branches of dicots as  
234 simplification and combination of stem bundles (Fahn, 1990). In the carpels of  
235 *Magnolia* (Liu et al., 2014) and *Michelia* (Zhang et al., 2017), amphicribal bundles  
236 were observed supplying the ovules and derived from cortical amphicribal bundles.  
237 Whereas in pistils of *Actinidia* (Guo et al., 2013) and *Dianthus* (Guo et al., 2017),  
238 amphicribal bundles were reported in the placenta, distinct from the collateral  
239 bundles in the carpel wall. Beyond that, amphicribal bundles seems widespread in the  
240 placenta and funiculus of angiosperms (e.g., *Papaver* [Kapoor, 1973], *Psoraleae*  
241 [Lersten and Don, 1966], *Drimys* [Tucker, 1975], *Nicotiana* [Dave et al., 1981],  
242 *Whytockia* [Wang and Pan, 1998], *Pachysandra* [Von Balthazar and Endress, 2002]).  
243 Combined with our above-mentioned findings, this would be a reasonable result since  
244 the ovule and placenta in the carpel is originated from the ovular axis.

245  
246 Considering the relationship between angiosperms and other seed plants lineages has  
247 been a lasting challenge. Taylor (1991) once set a goal for research on the origin of  
248 angiosperms, that is, correlation between carpel in angiosperms and reproductive  
249 structure in other seed plants. The branching RACBs of *Anaxagorea* carpels implies  
250 that the carpel might comparable to a compound shoot and provide an understanding  
251 of how the bract-bracteole-terminal ovule system in gymnosperms evolved to an  
252 angiosperm carpel (**Figure 4**). The Unifying Theory (Wang, 2010, 2018) suggests that  
253 angiosperm carpels are derived from the sterile bracts (formed carpel wall) attached to  
254 the ovule-bearing secondary shoot (formed ovule/placenta) of Cordaitales, a common  
255 ancestor of conifers and gnetophytes (Eames, 1952; Bold, 1973; Hickey and Taylor,  
256 1996; Doyle, 2008). Taking Cordaitales as the common ancestor of angiosperms and  
257 other gymnosperms may resolve the contradiction between the similar morphological  
258 characters and the distant phylogenetic relationship between angiosperms and  
259 gnetophytes (Hajibabaei et al., 2006; Wickett et al., 2014; Wan et al., 2018). However,

260 in Doyle's (2008) strict consensus of 18 most parsimonious trees of 364 steps  
261 obtained from the analysis with the arrangement of living taxa fixed to a molecular  
262 backbone constraint tree, when Cordaitales was putted in the ancestral position of  
263 conifers, gnetophytes, and angiosperms, the most parsimonious trees with *Amborella*  
264 basal in angiosperms (as in molecular analyses) would be of the anthophyte type,  
265 which is conflicts with molecular data. Since those potential ancestors include  
266 Cordaitales are fossils which still have many unclear or misinterpreted characters,  
267 more evidences were needed from different approaches.

268

269 In conclusion, our results provide a more reliable evidence that the placenta with  
270 ovule and the carpel wall has separated evolutionary origin, and thus support the idea  
271 that carpels originated from sterile bracts attached to the ovule-bearing shoot.  
272 However, this study is limited to only a single genus. We hypothesize that the axial  
273 homologs might be a regular presence in angiosperms carpel. However, these  
274 homologs may be diverse organized because the vascular bundle in carpel is usually  
275 simplified. We hope that more extensive studies, especially that on early diverging  
276 angiosperm groups with carpel stipe, such as Cabomboideae, Illicieae, and  
277 Schisandreae, in the future will test the validity of this hypothesis. Nature follows the  
278 principle that selecting a simple mechanism or module as building blocks for a  
279 complex system and then using that module repeatedly in other systems. The  
280 presentation of axial homologs in carpel seems the embodiment of this rule.  
281 Interestingly, the word "carpel" was defined in the Annonaceae family firstly by  
282 Dunal (1817) two hundred years ago, and now new enlightenment was brought to us  
283 in this big family once more. Attempting to explain the origin of angiosperms requires  
284 integrating morphological and molecular evidence from a wide range of fossil and  
285 extant seed plant data. A full theory of flower origins must account for all the major  
286 morphological innovations of the flower other than a focus on only one organ  
287 innovation (Frohlich, 2006). More robust answers will come from more integrative  
288 models with consideration of multiple traits at once from both extant plants and fossil  
289 records, high-quality taxonomic data, molecular mechanism of character evolution,  
290 and an abundance of databases cataloguing georeferenced occurrences.

291



292 **FUNDING**

293 This work was supported by the National Natural Science Foundation of China [grant  
294 number 31270282, 31970250].

295

296 **ACKNOWLEDGEMENTS**

297 We thank Prof. Lars Chatrou, Prof. Xin Wang, and Prof. Xin Zhang for helpful  
298 suggestions to our manuscript. And we thank Chun-Hui Wang, Shi-Rui Gan, and  
299 Yan-Lian Qiu for their help in searching for the target species in the field, to  
300 Qing-Long Wang for his help to take care of the transplanting materials in Hainan  
301 province, to Qiang Liu for sampling support, and to Lan-Jie Huang and Ke Li for their  
302 advice on writing.

303 **LITERATURE CITED**

- 304 Arber, E. A. N., and Parkin, J. (1907). On the origin of angiosperms. *Journal of the*  
305 *Linnean Society of London* 38, 29–80. doi: 10.1111/j.1095-8339.1907.tb01074.x
- 306 Beck, C. B. (2010). *An Introduction to Plant Structure and Development: Plant*  
307 *Anatomy for the Twenty-first Century*, 2nd edn. Cambridge, New York: Cambridge  
308 University Press.
- 309 Bold, H. C. (1973). *Morphology of plants*, 3rd edn. New York: Harper & Row.
- 310 Chatrou, L. W., Pirie, M. D., Erkens, R. H. J. , Couvreur, T. L. P., Neubig, K.M.,  
311 Abbott, J. R., et al. (2012). A new subfamilial and tribal classification of the  
312 pantropical flowering plant family Annonaceae informed by molecular  
313 phylogenetics. *Botanical Journal of the Linnean Society* 169, 5–40.  
314 doi:10.1111/j.1095-8339.2012.01235.x
- 315 Chatrou, L. W., Turner, I. M., Klitgaard, B. B , Maas, P. J. M., and Utteridge, T. M. A.  
316 (2018). A linear sequence to facilitate curation of herbarium specimens of  
317 Annonaceae. *Kew Bulletin* 73:39. doi: 10.1007/S12225-018-9764-3
- 318 Couvreur, T. L. P., Pirie, M. D., Chatrou, L. W., Saunders, R. M. K., Su, Y. C. F.,  
319 Richardson, J. E., et al. (2011). Early evolutionary history of the flowering plant  
320 family Annonaceae: steady diversification and boreotropical geodispersal. *Journal*  
321 *of Biogeography* 38, 664–680. doi: 10.1111/j.1365-2699.2010.02434.x
- 322 Crane, P. R. (1985). Phylogenetic analysis of seed plants and the origin of angiosperms.  
323 *Annals of the Missouri Botanical Garden* 72, 716–793. doi: 10.2307/2399221
- 324 Cronquist, A. (1988). *The evolution and classification of flowering plants*, 2nd edn.  
325 New York Botanical Garden: Bronx.
- 326 Dave, Y. S., Patel, N. D., and Rao, K. S. (1981). Structural design of the developing  
327 fruit of *Nicotiana tabacum*. *Phyton* 21, 63–71.
- 328 Deroin, T. (1988). *Aspects anatomiques et biologiques de la fleur des Annonacées*. PhD  
329 Thesis. Centre d’Orsay: Université de Paris-Sud, France.
- 330 Deroin, T. (1999). Functional Impact of the Vascular Architecture of Flowers in  
331 Annonaceae and Magnoliaceae, and Its Bearing on the Interpretation of the  
332 Magnoliaceous Gynoecium. *Systematics and Geography of Plants* 68, 213–224.  
333 doi: 10.2307/3668602
- 334 Doyle, J. A., and Donoghue, M.J. (1986). Seed plant phylogeny and the origin of  
335 angiosperms: an experimental cladistic approach. *The Botanical Review* 52,  
336 321–431. doi: 10.1007/BF02861082
- 337 Doyle, J. A., and Le Thomas, A. (1996). Phylogenetic analysis and character evolution  
338 in Annonaceae. *Adansonia* 18, 279–334.
- 339 Doyle, J. A., Sauquet, H., Scharaschkin, T., and Le Thomas, A. (2004). Phylogeny,  
340 molecular and fossil dating, and biogeographic history of Annonaceae and  
341 Myristicaceae (Magnoliales). *International Journal of Plant Sciences* 165,  
342 S55–S67. doi: 10.1086/421068
- 343 Doyle, J. A. (1978). Origin of angiosperms. *Annual Review of Ecology and Systematics*  
344 9, 365–392. doi: 10.1146/annurev.es.09.110178.002053
- 345 Doyle, J.A. (2006). Seed ferns and the origin of angiosperms. *Journal of the Torrey*  
346 *Botanical Society* 133, 169–209. doi:  
347 10.3159/1095-5674(2006)133%5B169:SFATOO%5D2.0.CO;2
- 348 Doyle, J. A. (2008). Integrating molecular phylogenetic and paleobotanical evidence on  
349 origin of the flower. *International Journal of Plant Sciences* 169, 816–843. doi:  
350 10.1086/589887
- 351 Dunal, M. F. (1817). *Monographie de la famille des Anonacées*. Paris: Treuttel &

- 352 Würtz.
- 353 Eames, A. J. (1952). Relationships of the Ephedrales. *Phytomorphology* 2, 79–100.
- 354 Eames, A. J. (1961). *Morphology of the angiosperms*. New York: McGraw-Hill.
- 355 Endress, P. K., Armstrong, J. E. (2011). Floral development and floral phyllotaxis in  
356 *Anaxagorea* (Annonaceae). *Annals of Botany* 108, 835–845. doi:  
357 10.1093/aob/mcr201
- 358 Endress, P. K. (2005). Carpels in *Brasenia* (Cabombaceae) are Completely Ascidiate  
359 Despite a Long Stigmatic Crest. *Annals of Botany* 96, 209–215. doi:  
360 10.1093/aob/mci174
- 361 Endress, P. K. (2015). Patterns of angiospermy development before carpel sealing  
362 across living angiosperms: diversity, and morphological and systematic aspects.  
363 *Botanical Journal of the Linnean Society* 178, 556–591. doi: 10.1111/boj.12294
- 364 Evert, R. F., and Eichhorn, S. E. (2013). *Raven Biology of Plants*, 8th edn. Palgrave  
365 Macmillan: W.H. Freeman Press.
- 366 Evert, R. F. (2006). *Esau's Plant Anatomy. Meristems, Cells, and Tissues of the Plant*  
367 *Body: Their Structure, Function, and Development*, 3rd edn. Hoboken, NJ: John  
368 Wiley & Sons, Inc.
- 369 Eyde, R. H. (1975). The foliar theory of the flower. *American Scientist* 63, 430–437.
- 370 Fahn, A. (1990). *Plant anatomy*, 4th edn. Oxford: Pergamon Press.
- 371 Frohlich, M. W., and Parker, D. S. (2000). The mostly male theory of flower  
372 evolutionary origins: from genes to fossils. *Systematic Botany* 25, 155–170. doi:  
373 10.2307/2666635
- 374 Frohlich, M. W. (2006). Recent developments regarding the evolutionary origin of  
375 flowers. *Advances in Botanical Research* 44, 64–116. doi:  
376 10.1016/S0065-2296(06)44002-7
- 377 Guo, X. M., Xiao, X., Wang, G. X., and Gao, R. F. (2013). Vascular anatomy of kiwi  
378 fruit and its implications for the origin of carpels. *Frontiers in Plant Science* 4, 391.  
379 doi: 10.3389/fpls.2013.00391
- 380 Guo, X. M., Yu, Y. Y., Bai, L., and Gao, R. F. (2017). *Dianthus chinensis* L.: the  
381 structural difference between vascular bundles in the placenta and ovary wall  
382 suggests their different origin. *Frontiers in Plant Science* 8, 1986. doi:  
383 10.3389/fpls.2017.01986
- 384 Hajibabaei, M., Xia, J., and Drouin, G. (2006). Seed plant phylogeny: Gnetophytes  
385 are derived conifers and a sister group to Pinaceae. *Molecular Phylogenetics and*  
386 *Evolution* 40, 208–217. doi: 10.1016/j.ympev.2006.03.006
- 387 Hickey, L. J., and Taylor, D. W. (1996). “Origin of the angiosperm flower,” In:  
388 *Flowering plant origin, evolution & phylogeny*. ed. D. W. Taylor and L. J. Hickey  
389 (New York: International Thomson publishing) 176–231.
- 390 Hufford, L. (1996). Developmental morphology of female flowers of *Gyrostemon* and  
391 *Tersonia* and floral evolution among Gyrostemonaceae. *American Journal of*  
392 *Botany* 83, 1471–1487. doi:10.1002/j.1537-2197.1996.tb13941.x
- 393 Igersheim, A., and Endress, P. K. (1997). Gynoecium diversity and systematics of the  
394 Magnoliales and Winteroids. *Botanical Journal of the Linnean Society* 124,  
395 213–271. doi: 10.1111/j.1095-8339.1997.tb01792.x
- 396 Kapoor, L. D. (1973). Constitution of amphicribal vascular bundles in capsule of  
397 *Papaver somniferum*. Linn. *Botanical Gazette* 134, 161–165. doi: 10.1086/336698
- 398 Kaul, R. B. (1967). Development and vasculature of the flowers of *Lophotocarpus*  
399 *calycinus* and *Sagittaria latifolia* (Alismaceae). *American Journal of Botany* 54,  
400 914–920. doi: 10.1002/j.1537-2197.1967.tb10715.x

- 401 Lersten, N. R., and Don, K. W. (1966). The discontinuity plate, a definitive floral  
402 characteristic of the *Psoraleae* (Leguminosae). *American Journal of Botany* 53,  
403 548–555. doi: 10.2307/2440004
- 404 Liu, W. Z., Hilu, K., and Wang, Y. L. (2014). From leaf and branch into a flower:  
405 *Magnolia* tells the story. *Botanical Studies* 55, 28. doi: 10.1186/1999-3110-55-28  
406 doi: 10.1186/1999-3110-55-28
- 407 Mathews, S. and Kramer, E. M. (2012). The Evolution of Reproductive Structures in  
408 Seed Plants: A Re-Examination Based on Insights from Developmental Genetics.  
409 *New phytologist* 194, 910–923. doi: 10.1111/j.1469-8137.2012.04091.x
- 410 McKown, A. D., and Dengler, N. G. (2010). Vein patterning and evolution in C4 plants.  
411 *Botany* 88, 775–786. doi: 10.1139/B10-055
- 412 Metcalfe, C. R., and Chalk, L. (1979). *Anatomy of the Dicotyledons, vol. 1, Systematic*  
413 *Anatomy of Leaf and Stem, with a Brief History of the Subject*, 2nd edn. Oxford:  
414 Clarendon Press.
- 415 Nixon, K. C., Crepet, W. L., Stevenson, D., and Friis, E. M. (1994). A reevaluation of  
416 seed plant phylogeny. *Annals of the Missouri Botanical Garden* 81, 484–533. doi:  
417 10.2307/2399901
- 418 Retallack, G. and Dilcher, D. L. (1981). “A coastal hypothesis for the dispersal and  
419 rise to dominance of flowering plants,” in *Paleobotany, Paleoecology and*  
420 *Evolution*, ed. K. J. Niklas (New York: Praeger Publishers), 27–77.
- 421 Roe, J. L., Nemhauser, J. L., and Zambrysk, P. C. (1997). Torsion Participates in  
422 Apical Tissue Formation During Gynoecium Development in *Arabidopsis*. *Plant*  
423 *Cell* 9: 335–353. doi: 10.2307/3870486
- 424 Robertson, R. E., and Tucker, S. C. (1979). Floral ontogeny of *Illicium floridanum*,  
425 with emphasis on stamen and carpel development. *American Journal of Botany* 66,  
426 605–617. doi: 10.1002/j.1537-2197.1979.tb06264.x
- 427 Robinson-Beers, K., Pruitt, R. E., and Gasser, C. S. (1992). Ovule development in  
428 wild-type *Arabidopsis* and two female-sterile mutants. *Plant Cell* 4, 1237–1249.  
429 doi: 10.1105/tpc.4.10.1237
- 430 Sauquet, H., Doyle, J. A., Scharaschkin, T., Borsch, T., Hilu, K. W., Chatrou, L. W.,  
431 et al. (2003). Phylogenetic analysis of Magnoliales and Myristicaceae based on  
432 multiple data sets: implications for character evolution. *Botanical Journal of the*  
433 *Linnean Society* 142, 125–186. doi: 10.1046/j.1095-8339.2003.00171.x
- 434 Skinner, D. J., Hill, T. A., Gasser, C. S. (2004). Regulation of Ovule Development.  
435 *Plant Cell* 16, S32–S45. doi: 10.1105/tpc.015933
- 436 Stebbins, G. L. (1974). *Flowering Plants: Evolution above the Species Level*.  
437 Cambridge, Massachusetts: The Belknap Press of Harvard University Press.
- 438 Surveswaran, S., Wang, R. J., Su, Y. C. F., and Saunders, R. M. K. (2010). Generic  
439 delimitation and historical biogeography in the early-divergent ‘ambavioid’  
440 lineage of Annonaceae: *Cananga*, *Cyathocalyx* and *Drepananthus*. *Taxon* 59,  
441 1721–1734. doi: 10.1002/tax.596007
- 442 Takhtajan, A. L. (1991). *Evolutionary trends in flowering plants*. New York:  
443 Columbia University Press.
- 444 Taylor, D. W. (1991). Angiosperm ovules and carpels: their characters and polarities,  
445 distribution in basal clades and structural evolution. *Postilla* 208, 1–40.
- 446 Tucker, S. C. (1975). Carpellary vasculature and the ovular vascular supply in *Drimys*.  
447 *American Journal of Botany* 62, 191–197. doi:  
448 10.1002/j.1537-2197.1975.tb14052.x
- 449 Tucker, S. C. (1961). Phyllotaxis and vascular organization of the carpels in *Michelia*

- 450 *fuscata*. *American Journal of Botany* 48, 60–71. doi:  
451 10.1002/j.1537-2197.1961.tb11605.x
- 452 Von Balthazar, M., and Endress, P. K. (2002). Reproductive structures and systematics  
453 of Buxaceae. *Botanical Journal of the Linnean Society* 140, 193–228. doi:  
454 10.1046/j.1095-8339.2002.00107.x
- 455 Wan, T., Liu, Z. M., Li, L. F., Leitch, A. R., Leitch, I. J., Lohaus, R., et al. (2018). A  
456 genome for gnetophytes and early evolution of seed plants. *Nature Plants* 4, 82–89.  
457 doi: 10.1038/s41477-017-0097-2
- 458 Wang, X. (2010). *The dawn angiosperms*. Heidelberg: Springer.
- 459 Wang, X. (2018). *The dawn angiosperms*, 2nd edn. Heidelberg: Springer.
- 460 Wang, Y. Z., and Pan, K. Y. (1998). “Comparative floral anatomy of *Whytockia*  
461 (*Gesneriaceae*) endemic to China,” in *Floristic Characteristics and Diversity of*  
462 *East Asian Plants*, ed. A. L. Zhang, and S. G. Wu (Beijing: China Higher Education  
463 Press), 352–366.
- 464 Wettstein, R. (1907). Über des vorkommen zweigeschlechtig Infloreszenzen bei  
465 *Ephedra*. *Festschriften Naturwissenschaften Vereins Universitiit Wien* 25, 21–28.
- 466 Wettstein, R. (1935). *Handbuch der systematischen Botanik*, 4th edn. Leipzig: Franz  
467 Deuticke.
- 468 Wickett, N. J., Mirarab, S., Nguyen, N., Warnow, T., Carpenter, E., Matasci, N., et al.  
469 (2014). Phylotranscriptomic analysis of the origin and early diversification of land  
470 plants. *Proceedings of the National Academy of Sciences of the United States of*  
471 *America* 111, E4859–E4868. doi:10.1073/pnas.1323926111
- 472 Zhang, Q., Huang, L-J., Wang, X-F. (2018). The unusual gynoeceum structure and  
473 extragynoeceal pollen-tube pathway in *Phytolacca* (*Phytolaccaceae*). *Plant*  
474 *Systematics and Evolution* 304: 885–894. doi:10.1007/s00606-018-1518-z
- 475 Zhang, X., Liu, W., and Wang, X. (2017). How the ovules get enclosed in  
476 magnoliaceous carpels. *PLoS One* 12, e0174955.  
477 doi:10.1371/journal.pone.0174955
- 478 Zhang, X., zhang, Z. X. and Zhao, Z. (2019). Floral ontogeny of *Illicium Lanceolatum*  
479 (*Schisandraceae*) and its implications on carpel homology. *phytotaxa* 416, 200–210.  
480 doi: 10.11646/phytotaxa.416.3.1  
481

482 **FIGURE 1.** SEM of *Anaxagorea* carpel. (A–G) *A. luzonensis*. (A) Carpel primordia.  
483 (B–C) Appearance of the basal stipe. (D) Incomplete stipe closure. (E–F) Carpel  
484 thickening and stigma formation. (G) Carpel stipes at anthesis (box). (H–K) *A.*  
485 *javanica* shows similar carpel developmental features correlating with changes  
486 depicted in (A, C, D, F). Carpel stipes are marked by arrows. Abbreviations: c, carpel;  
487 s, stamen; p, perianth. Scale bars: (A–F, H–K) = 100  $\mu\text{m}$ ; (G) = 1 mm.

488  
489 **FIGURE 2.** Paraffin sections of carpels stained with Safranin O and Fast Green.  
490 (A–D) Anthetic carpels of *A. luzonensis*, from base up. (A) The ring-arranged  
491 collateral bundles (RACBs) at the base of carpel, ventral sides are marked by arrows.  
492 (B) Bundle complexes with xylem surrounded by phloem in each carpel (ring marked).  
493 (C) A short ascidiate zone. (D) Ovule bundles separate from the CBCs. (E–H) Mature  
494 carpel of *A. luzonensis*. (E) Two sets of RACBs at the level of (B). (F) Ventral  
495 bundles (vb) and ovule bundles (ob). (G) Detailed view of a vb from (F). (H) Detailed  
496 view of an ob from (F). (I–M) Mature carpel of *A. javanica*, from base up. (I) RACBs  
497 at the base of carpel, a distinct collateral bundle marked by ring. (J–K) Bundles  
498 rearranged into two sets of RACBs. (L) The CBCs with phloem joint each other. (M)  
499 The base of ovule locule. Abbreviations: db, dorsal bundle; vb, ventral bundle; ob,  
500 ovule bundle. Scale bars = 200  $\mu\text{m}$ .

501  
502 **FIGURE 3.** Drawings of sequential sections of a mature *Anaxagorea* carpel.  
503 Vasculature colored with phloem dark green and xylem red; distinct vascular bundles  
504 within the vascular complex are outlined. (A) Schematic longitudinal section with  
505 ventral side at the left. Vertical zones labeled with letters correspond to the transverse  
506 sections of panels to the right. (B–M) Transverse sections (ventral side up) here are  
507 described from the base up to the carpel in the following. (M) The ring-arranged  
508 collateral bundles (RACBs) at the base of carpel. (J–L) Vasculature changes from a  
509 set of RACBs at the base of the carpel to two sets of RACBs. (H–I) Vasculature  
510 changes from each set of RACBs to the “C”-shaped bundle complexes (CBCs). (E–G)  
511 Ovule bundles are separated from the CBCs, while others into the carpel wall. (B–D)  
512 Meshy bundles in the carpel wall. Abbreviations: db, dorsal bundle; vb, ventral bundle;  
513 ob, ovule bundle. Scale bars = 500  $\mu\text{m}$ .

514  
515 **FIGURE 4.** Homology comparison between *Anaxagorea* carpel vasculature and  
516 female reproductive shoot of seed plants. The color implies homologies. Cordaitales  
517 is a Carboniferous to Permian gymnosperm group. On the female reproductive shoot  
518 of Cordaitales, the ovules (yellow) are interspersed with sterile scales (light green),  
519 and ovular axis bearing bracteoles (yellow). The bracteoles on the ovular axis may  
520 aggregate to the ovule and the ovular axis become shorter. Arrangement of the ovules  
521 on the shoot apex (dark green) and the of lengths ovular axis are relatively flexible.  
522 *Ephedra* as a genus represents gnetophytes, which shows its female reproductive  
523 shoot with subtending bracts (light green), have a pair of ovules (yellow) at their  
524 apical end with the abortive apex of the shoot axis (dark green) lying in between. The  
525 axis bearing a pair of ovules and their envelope is called gynocladal axis.

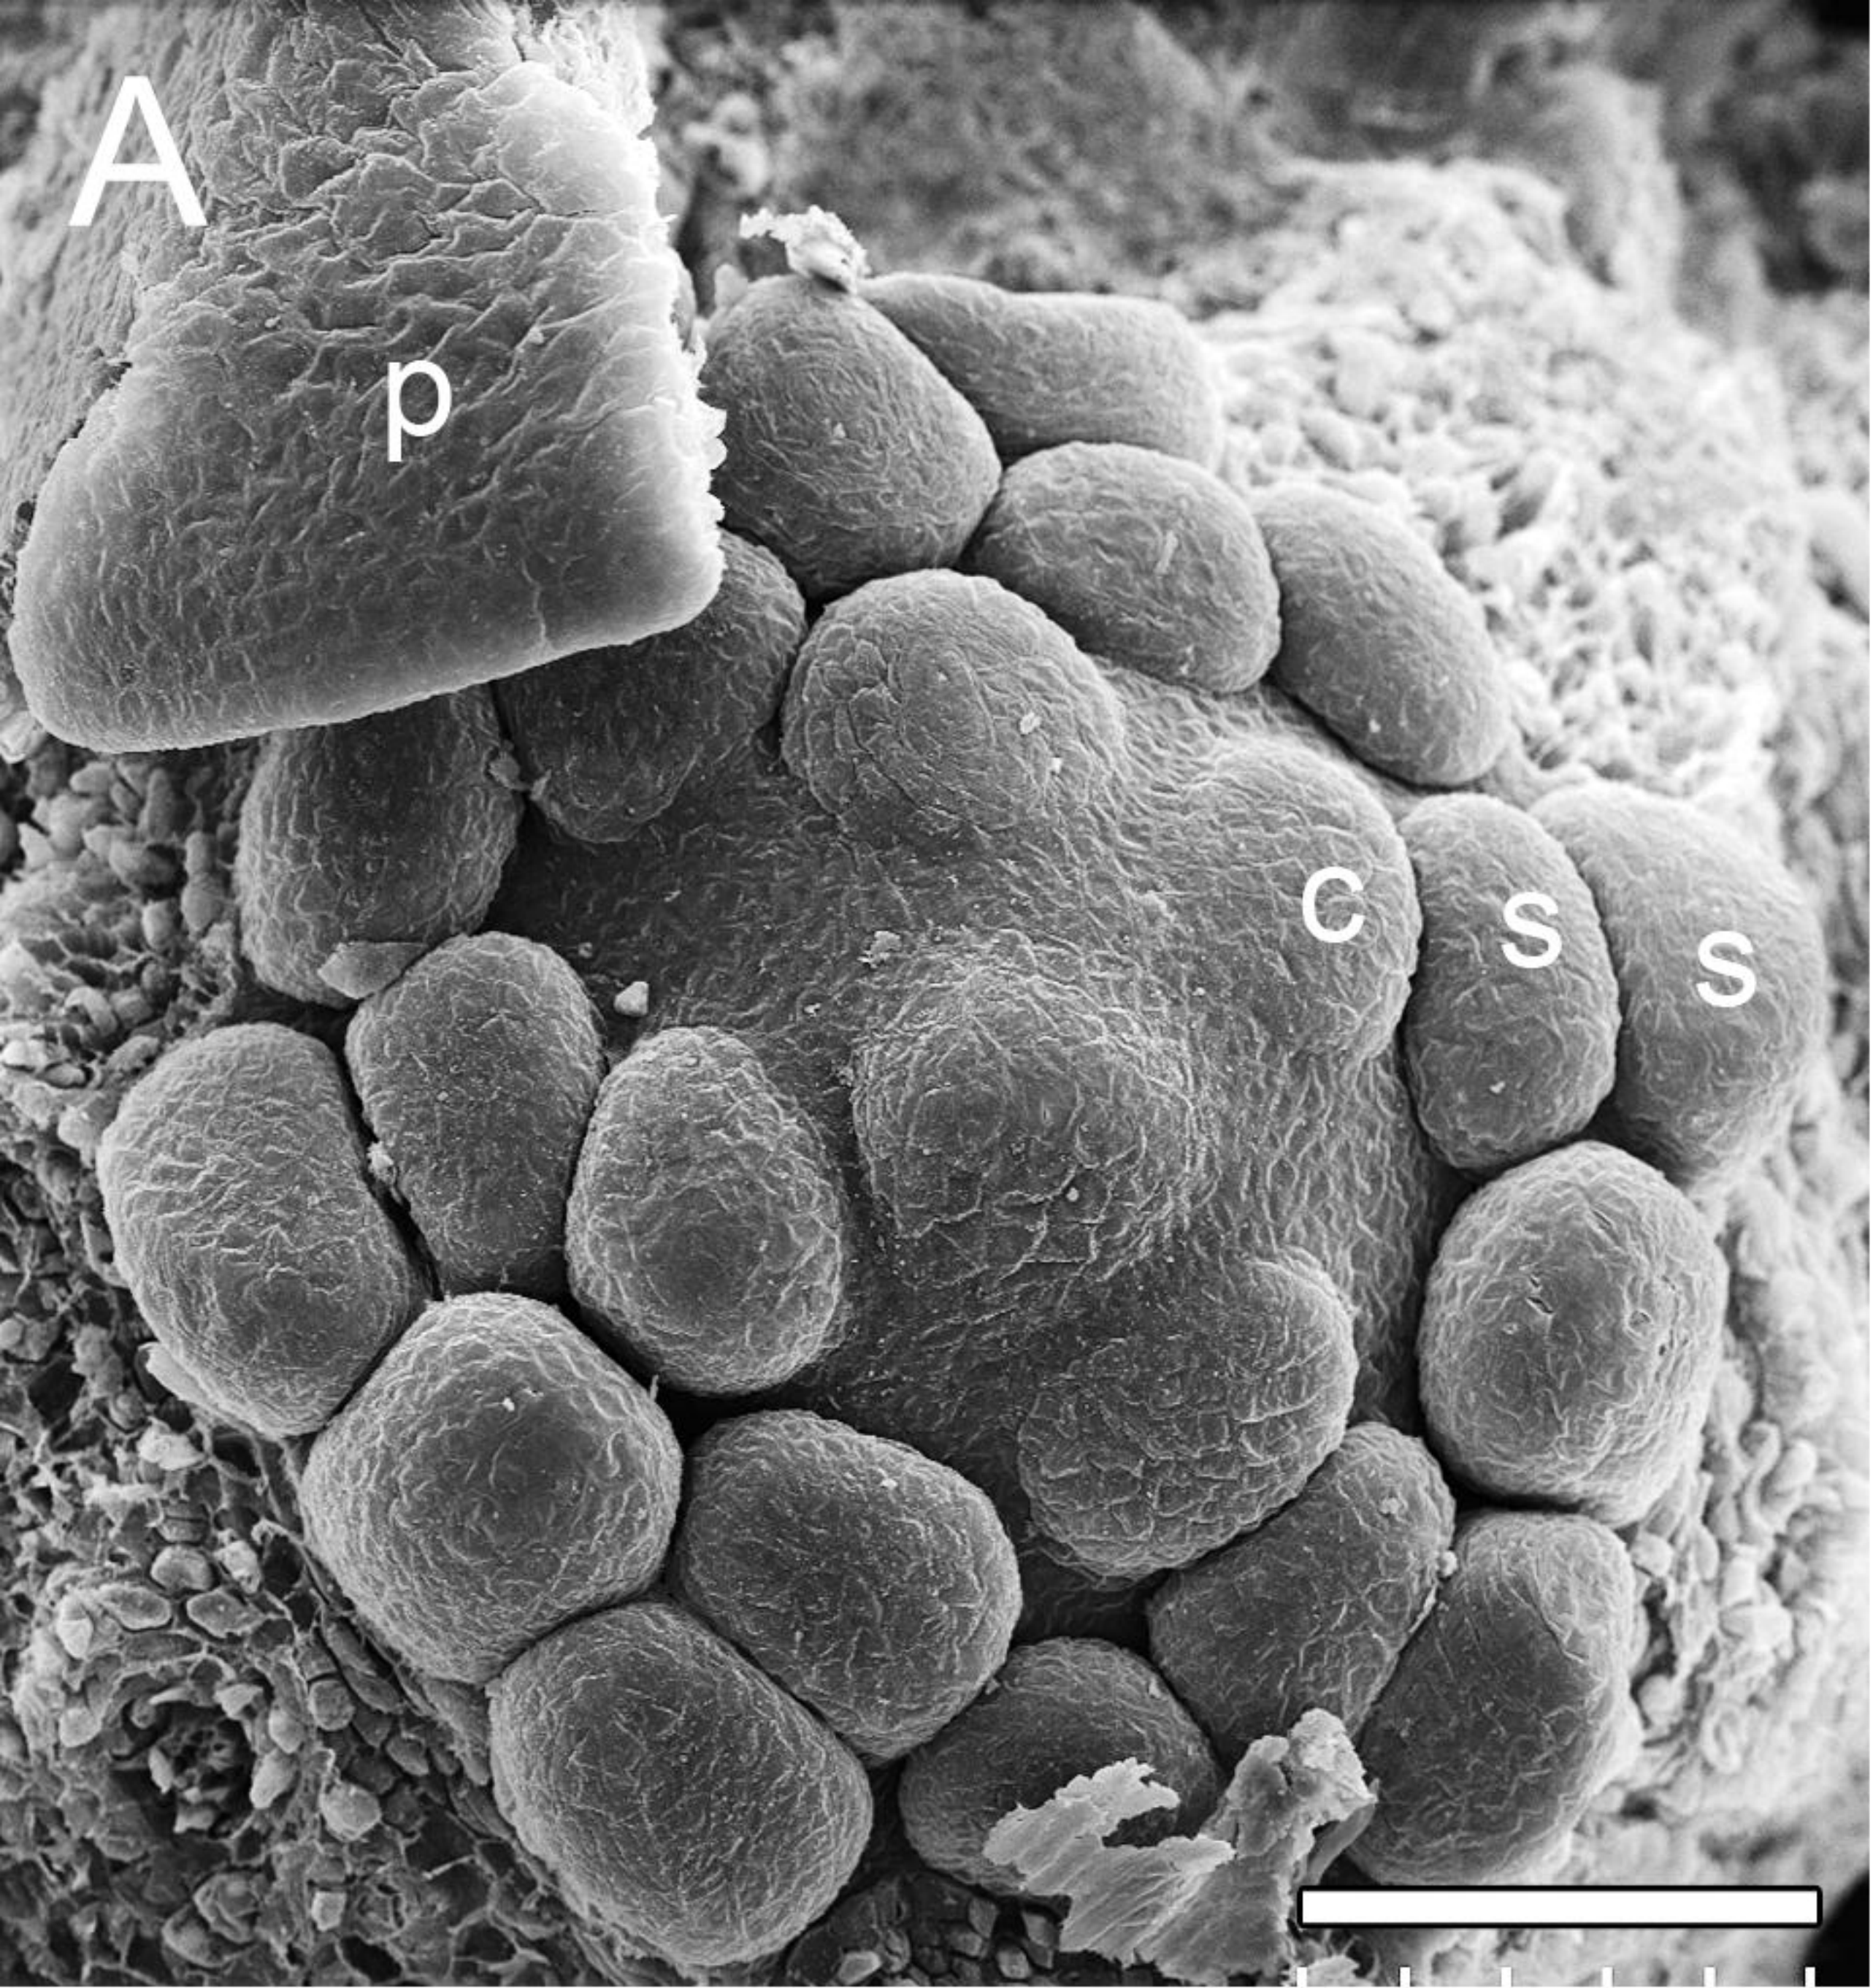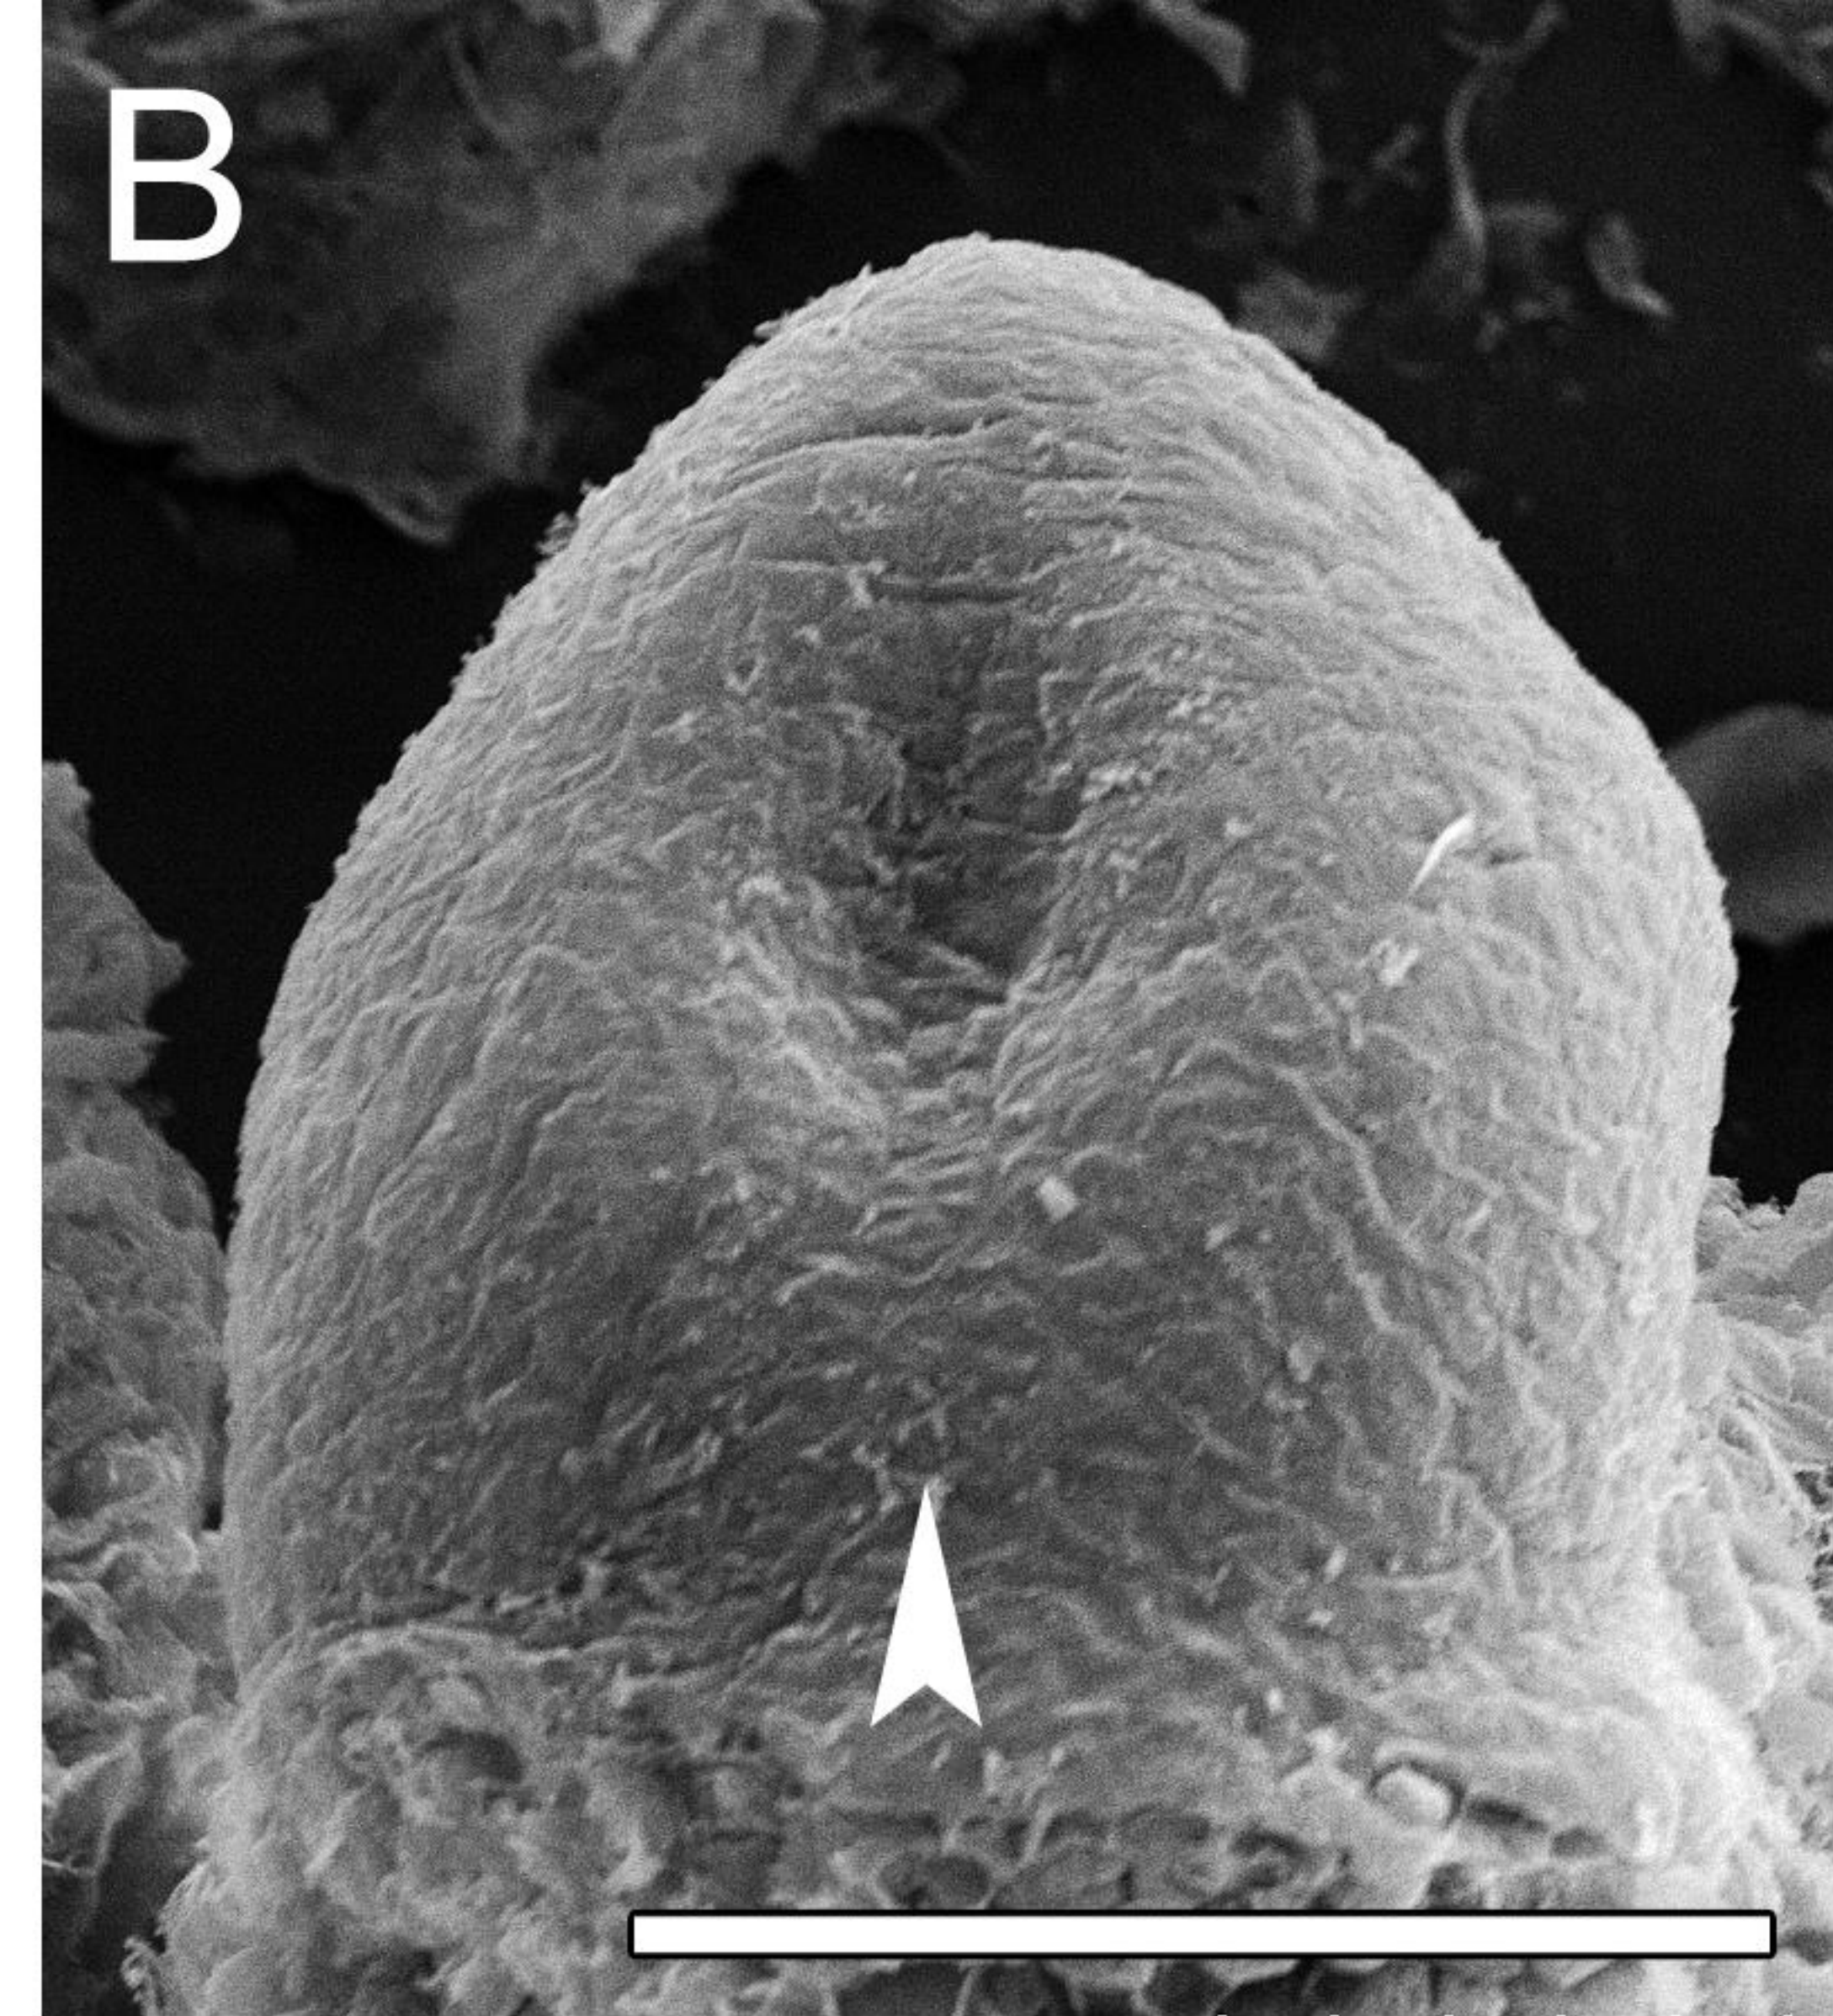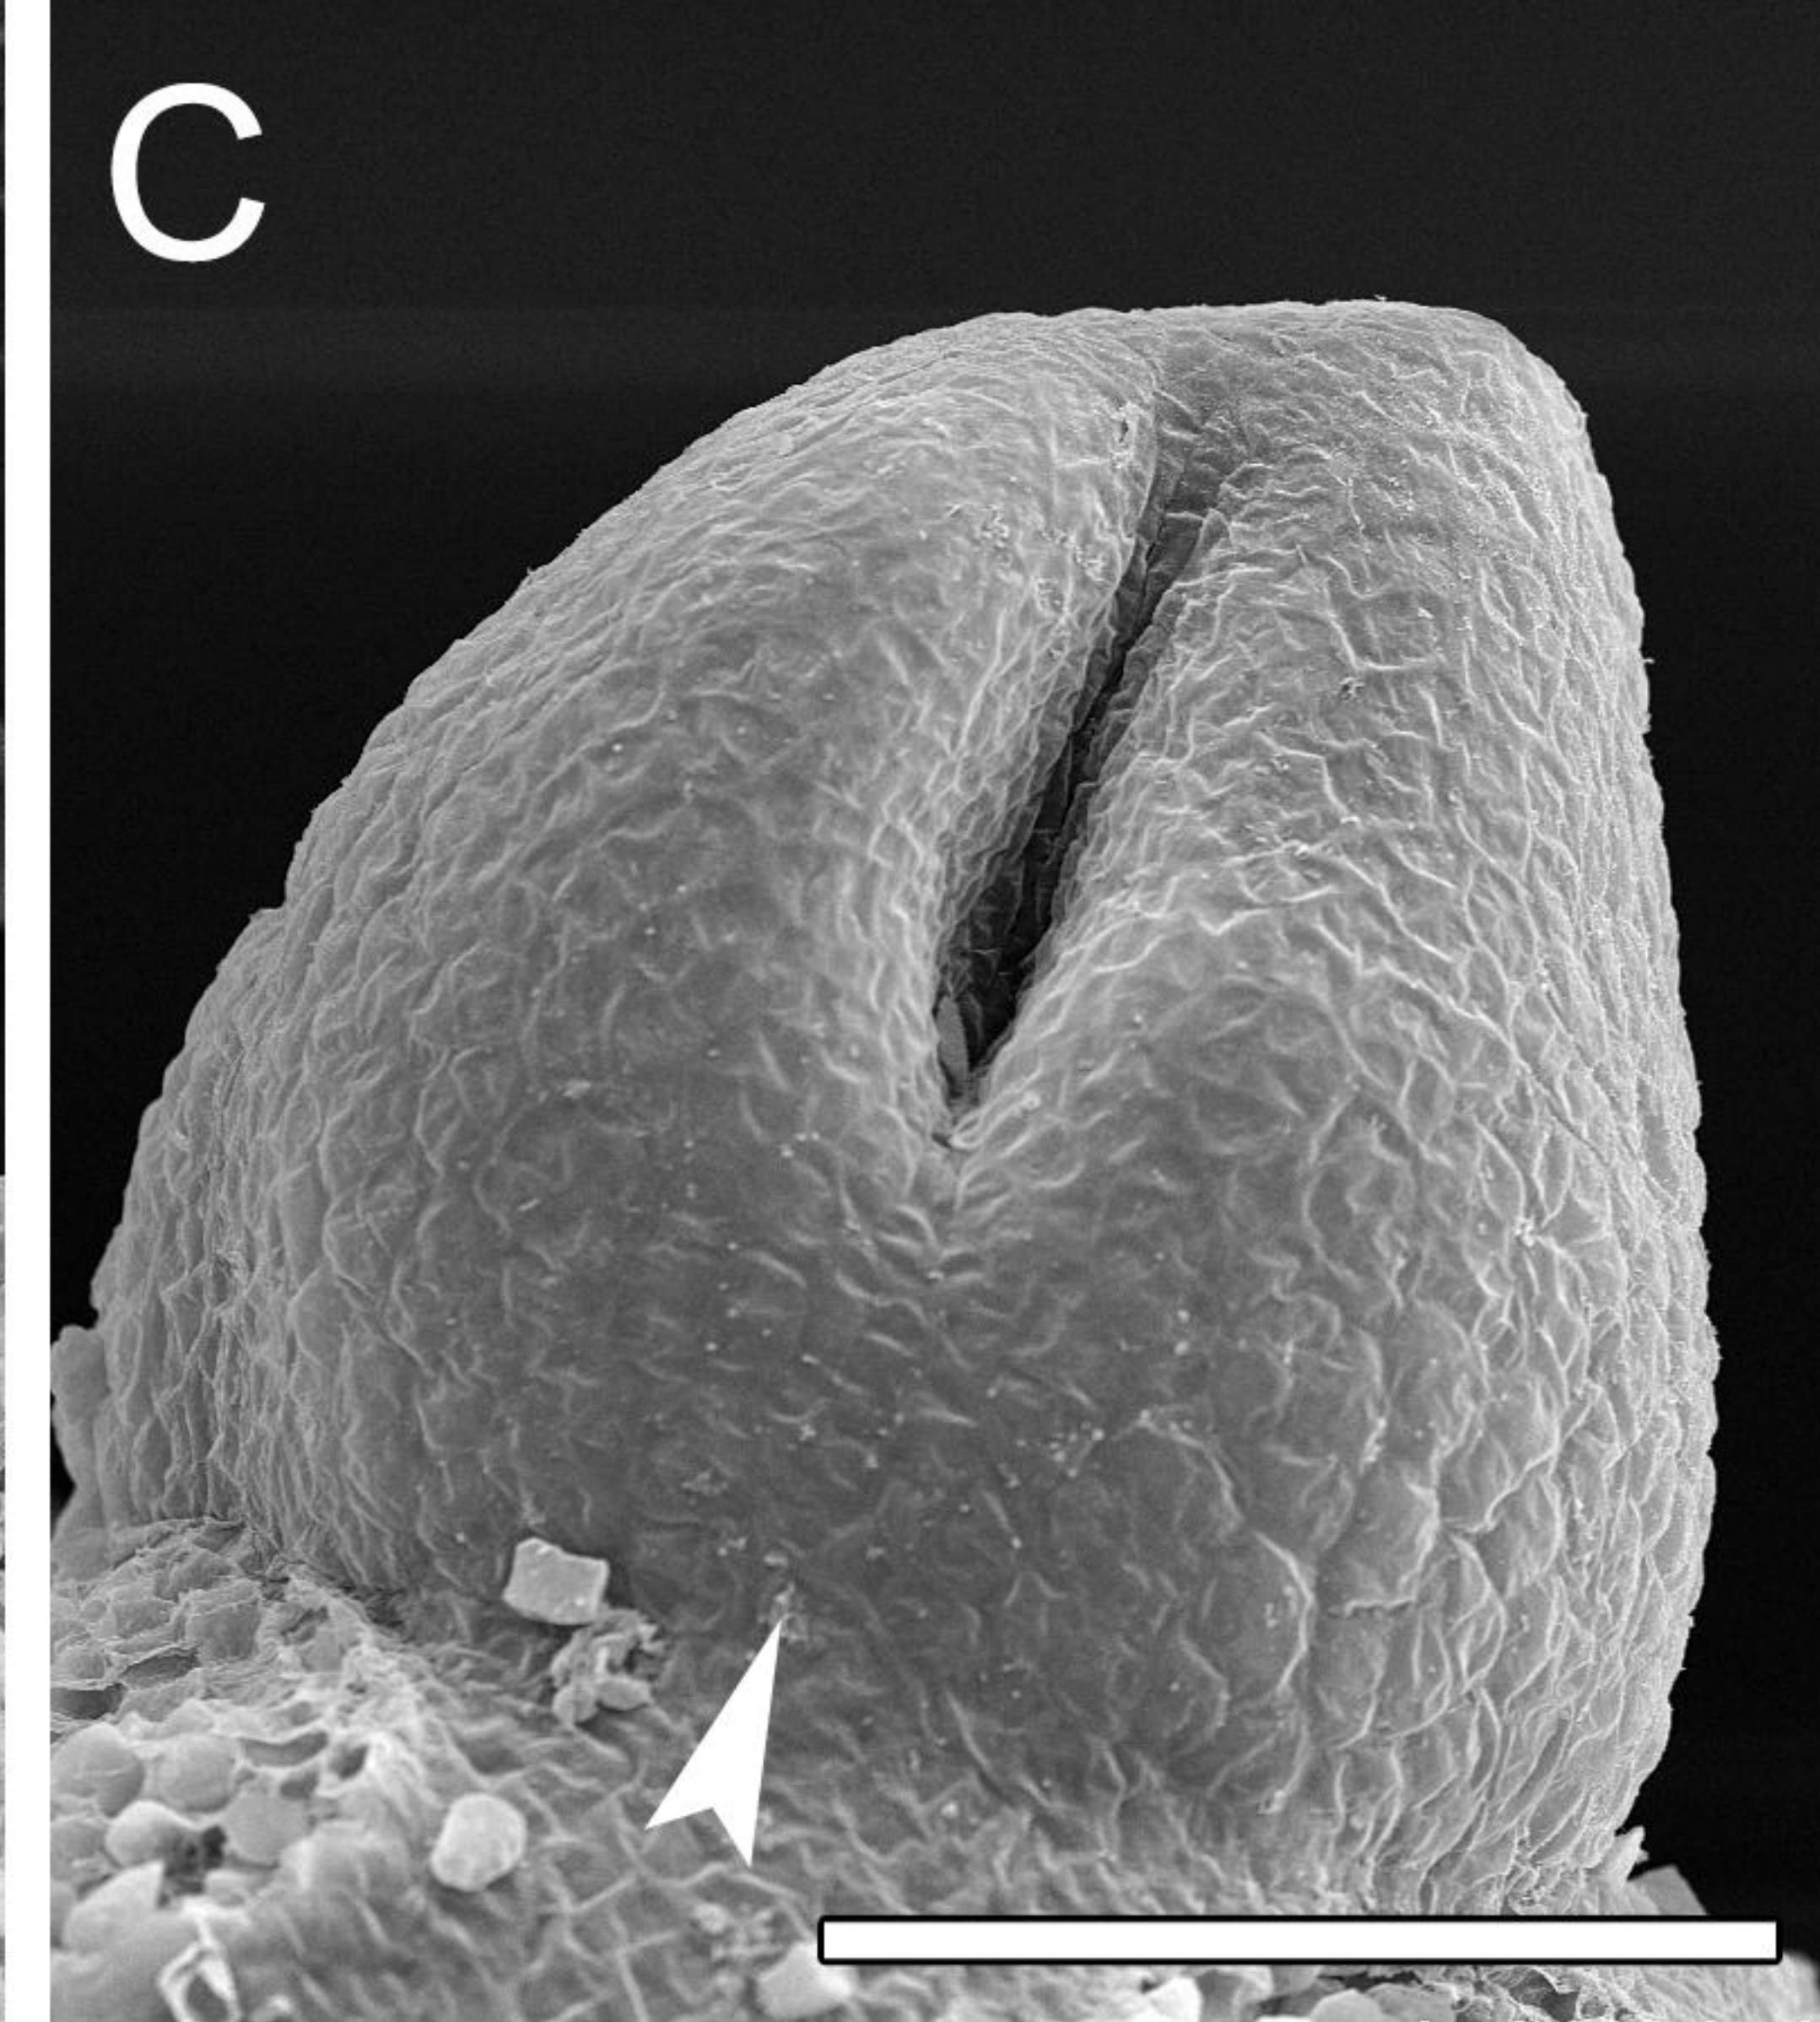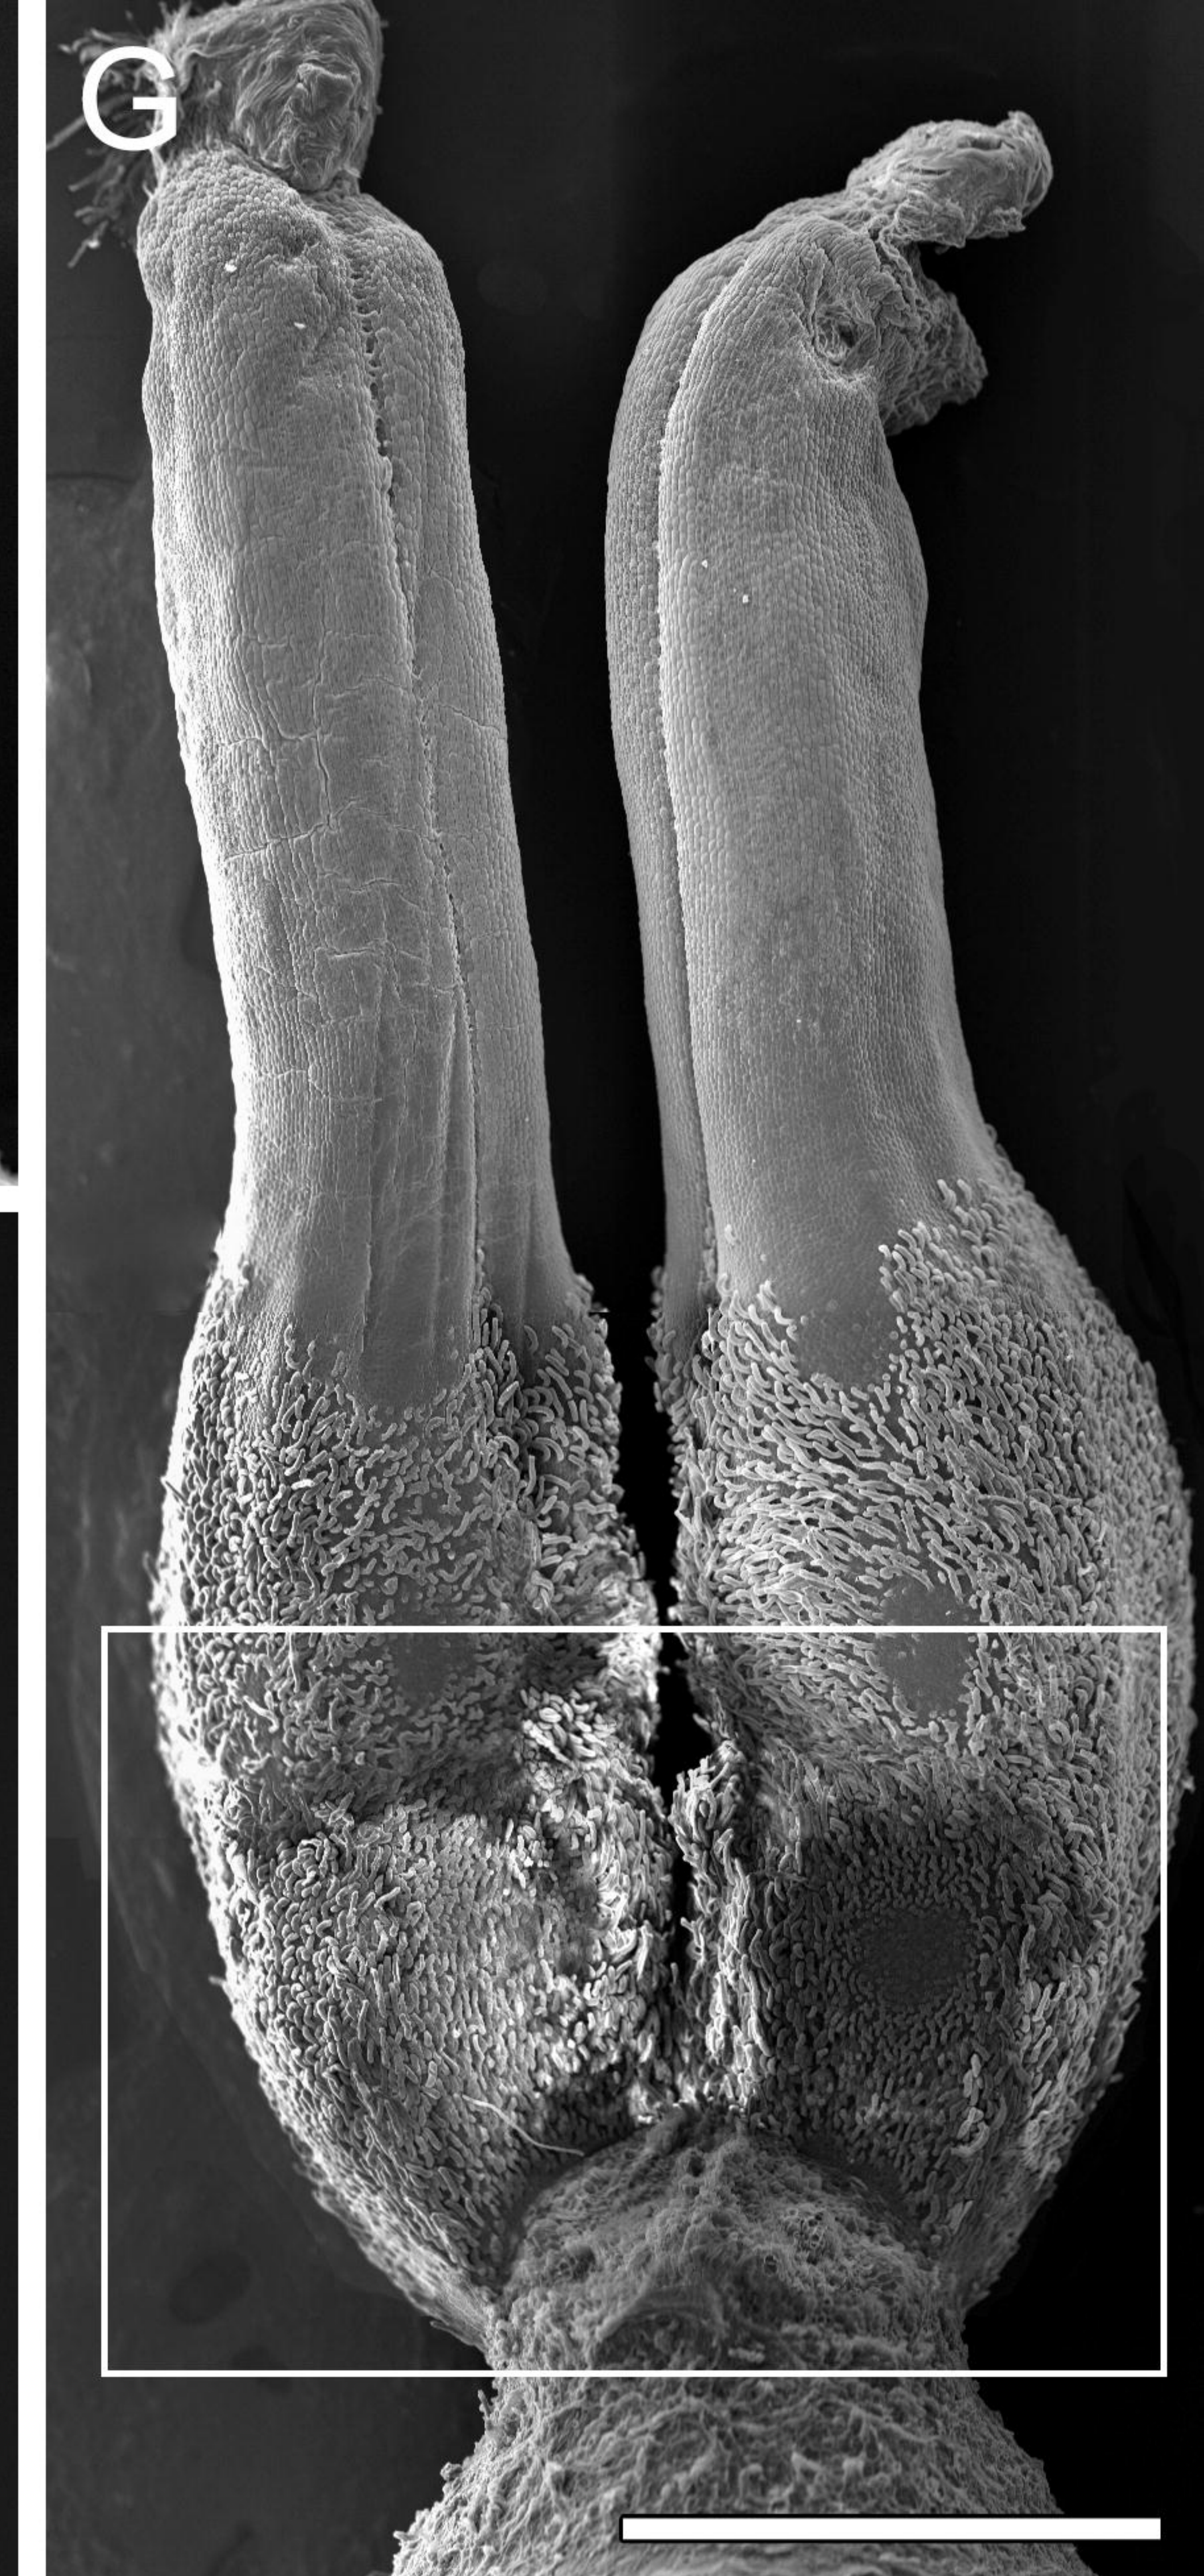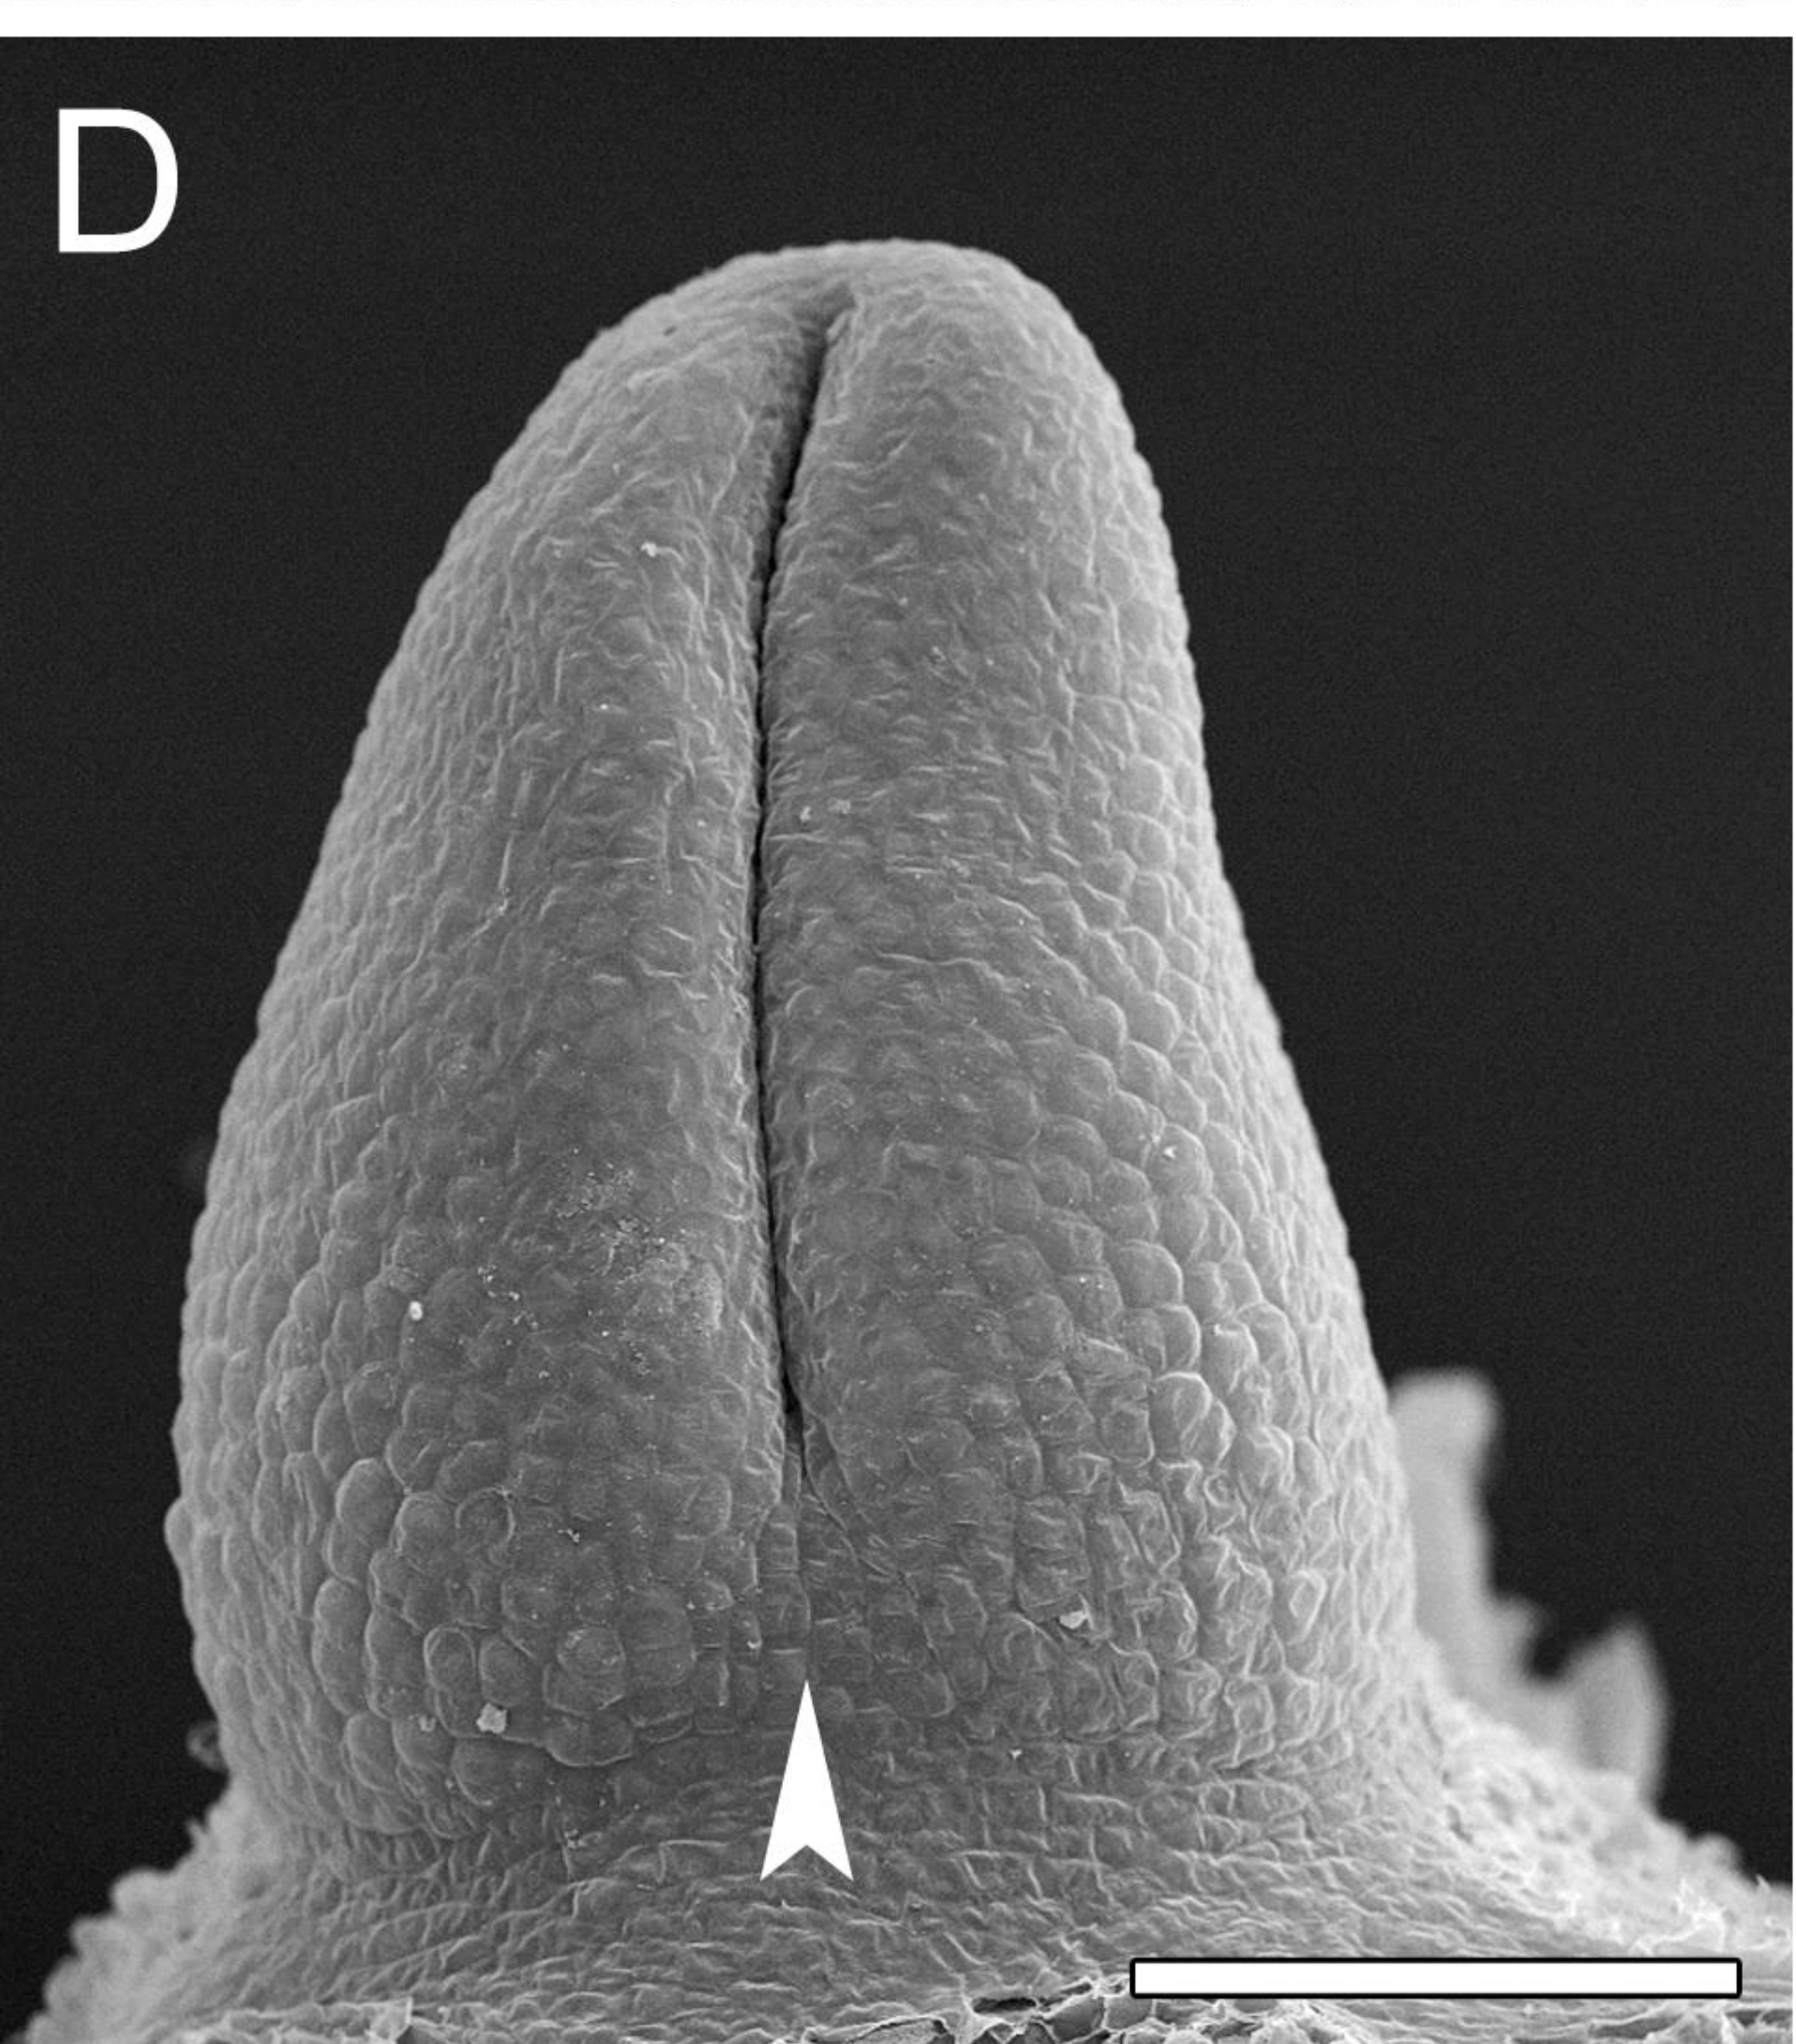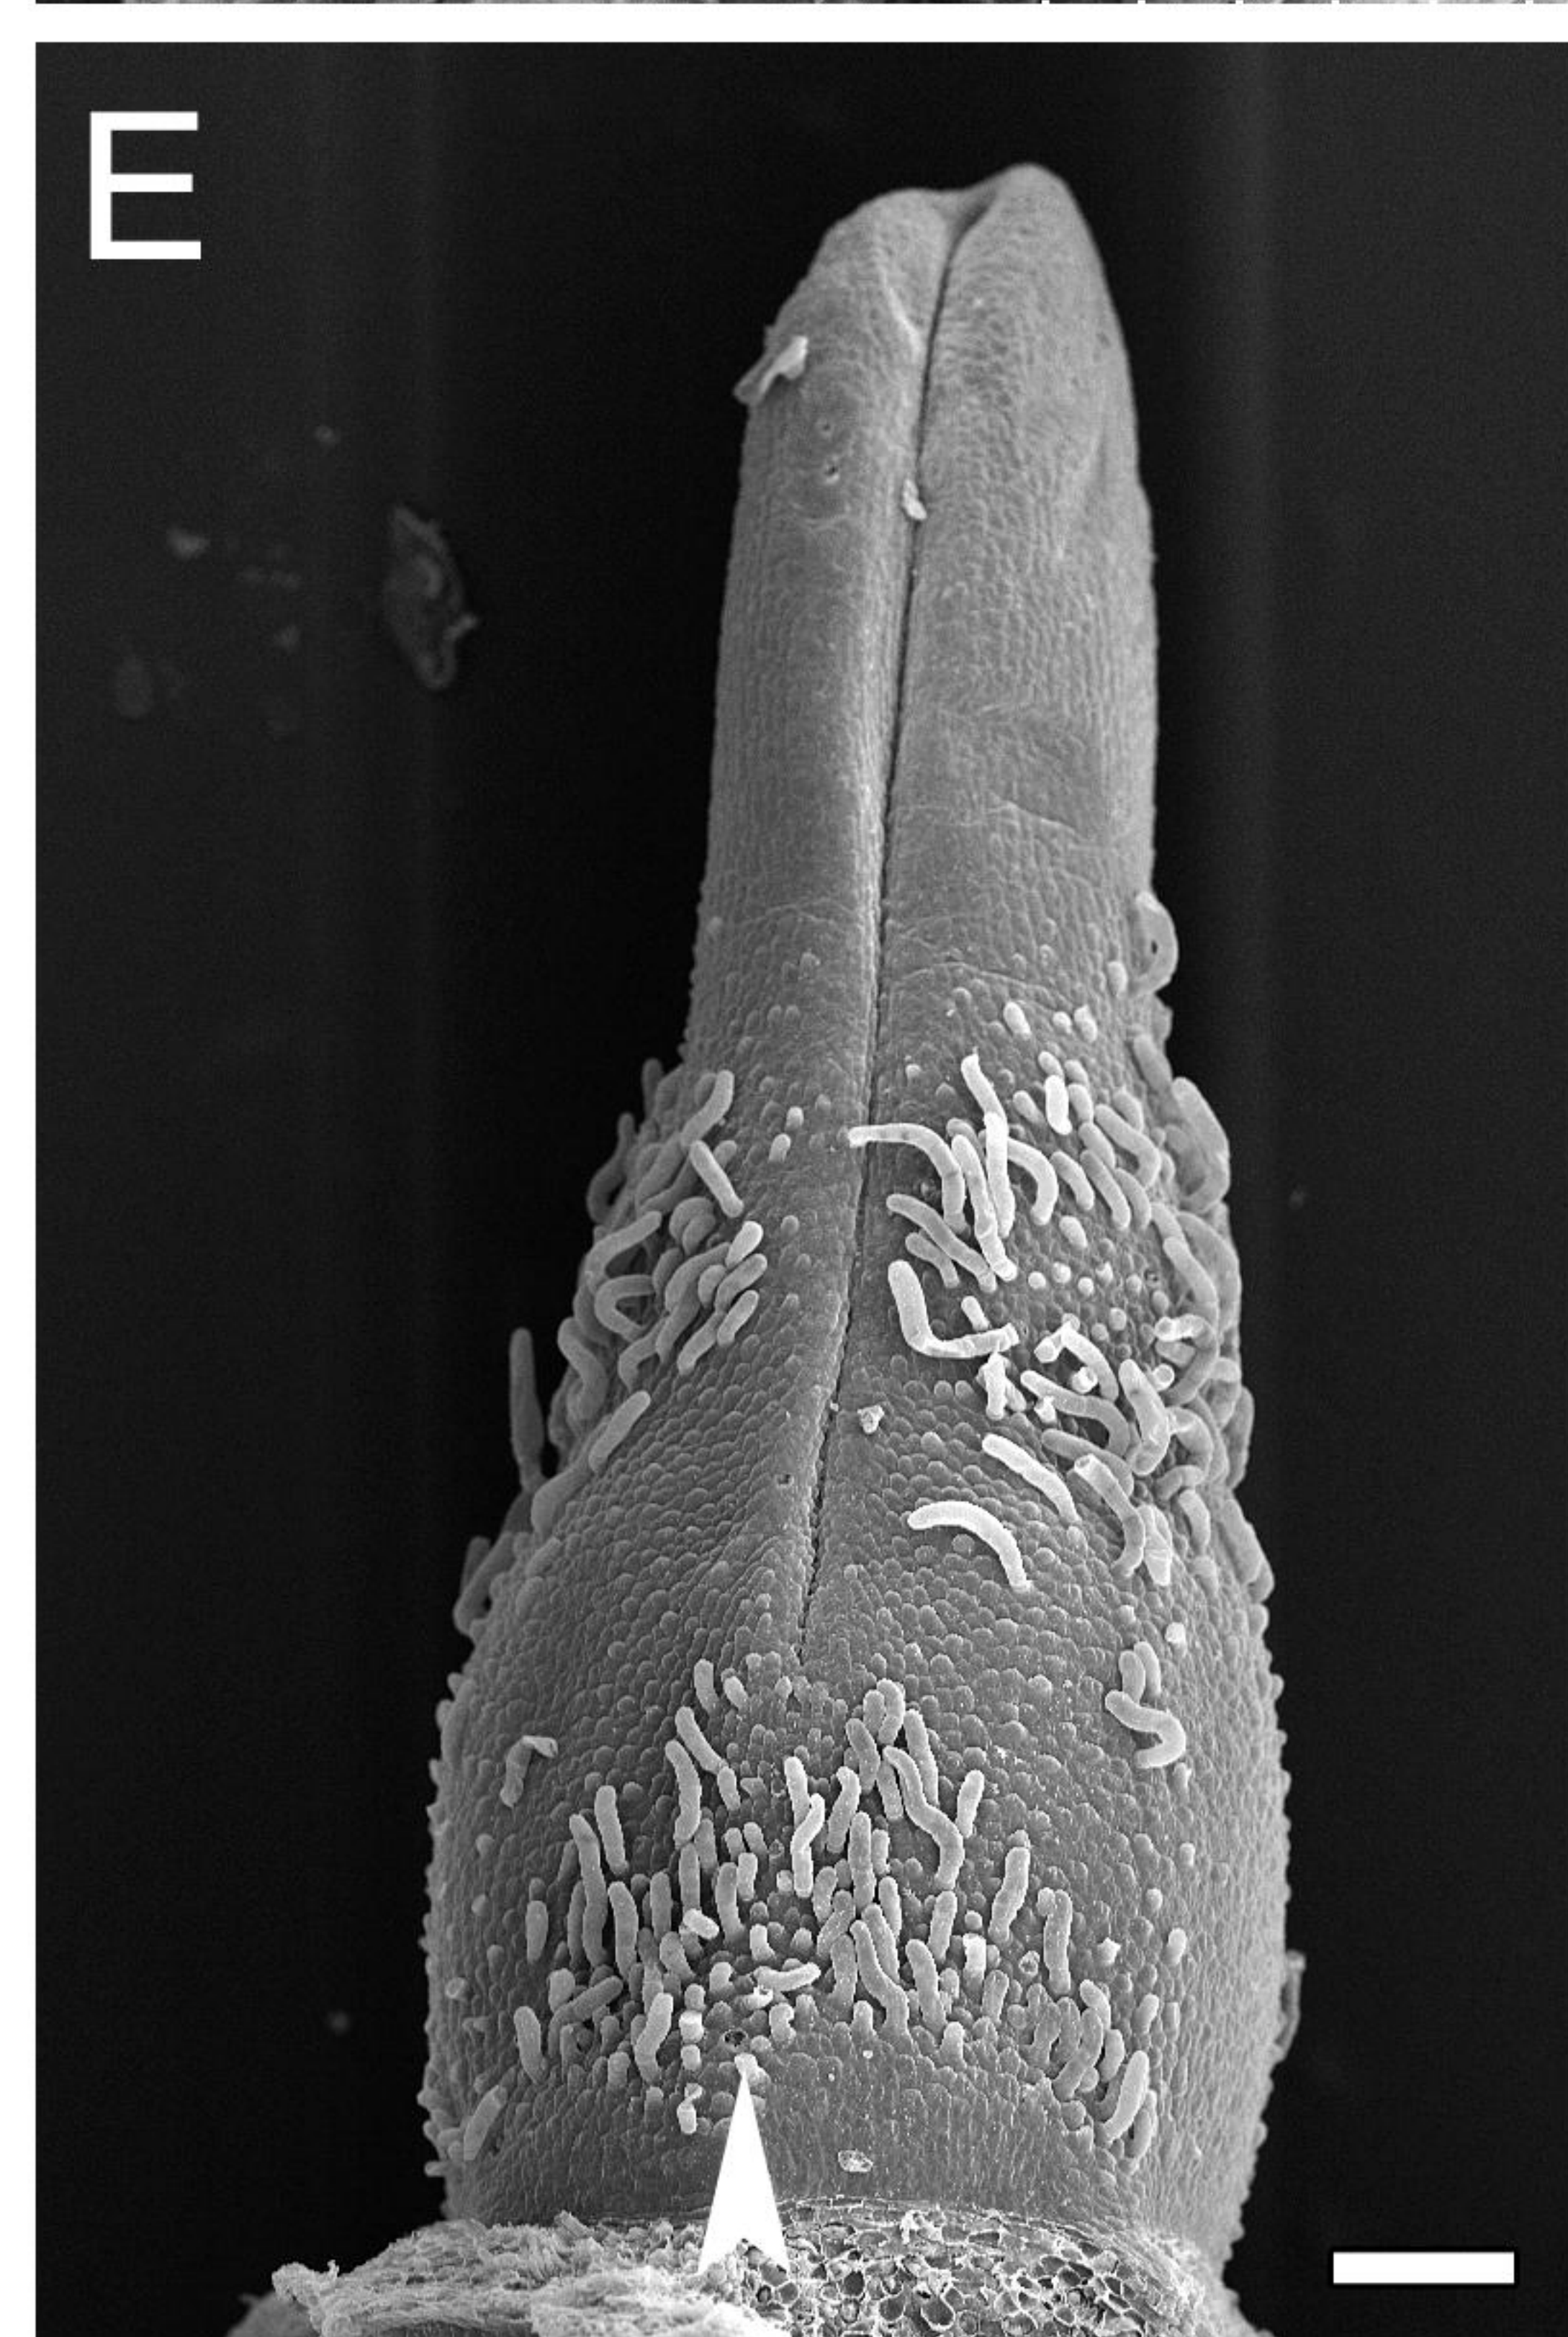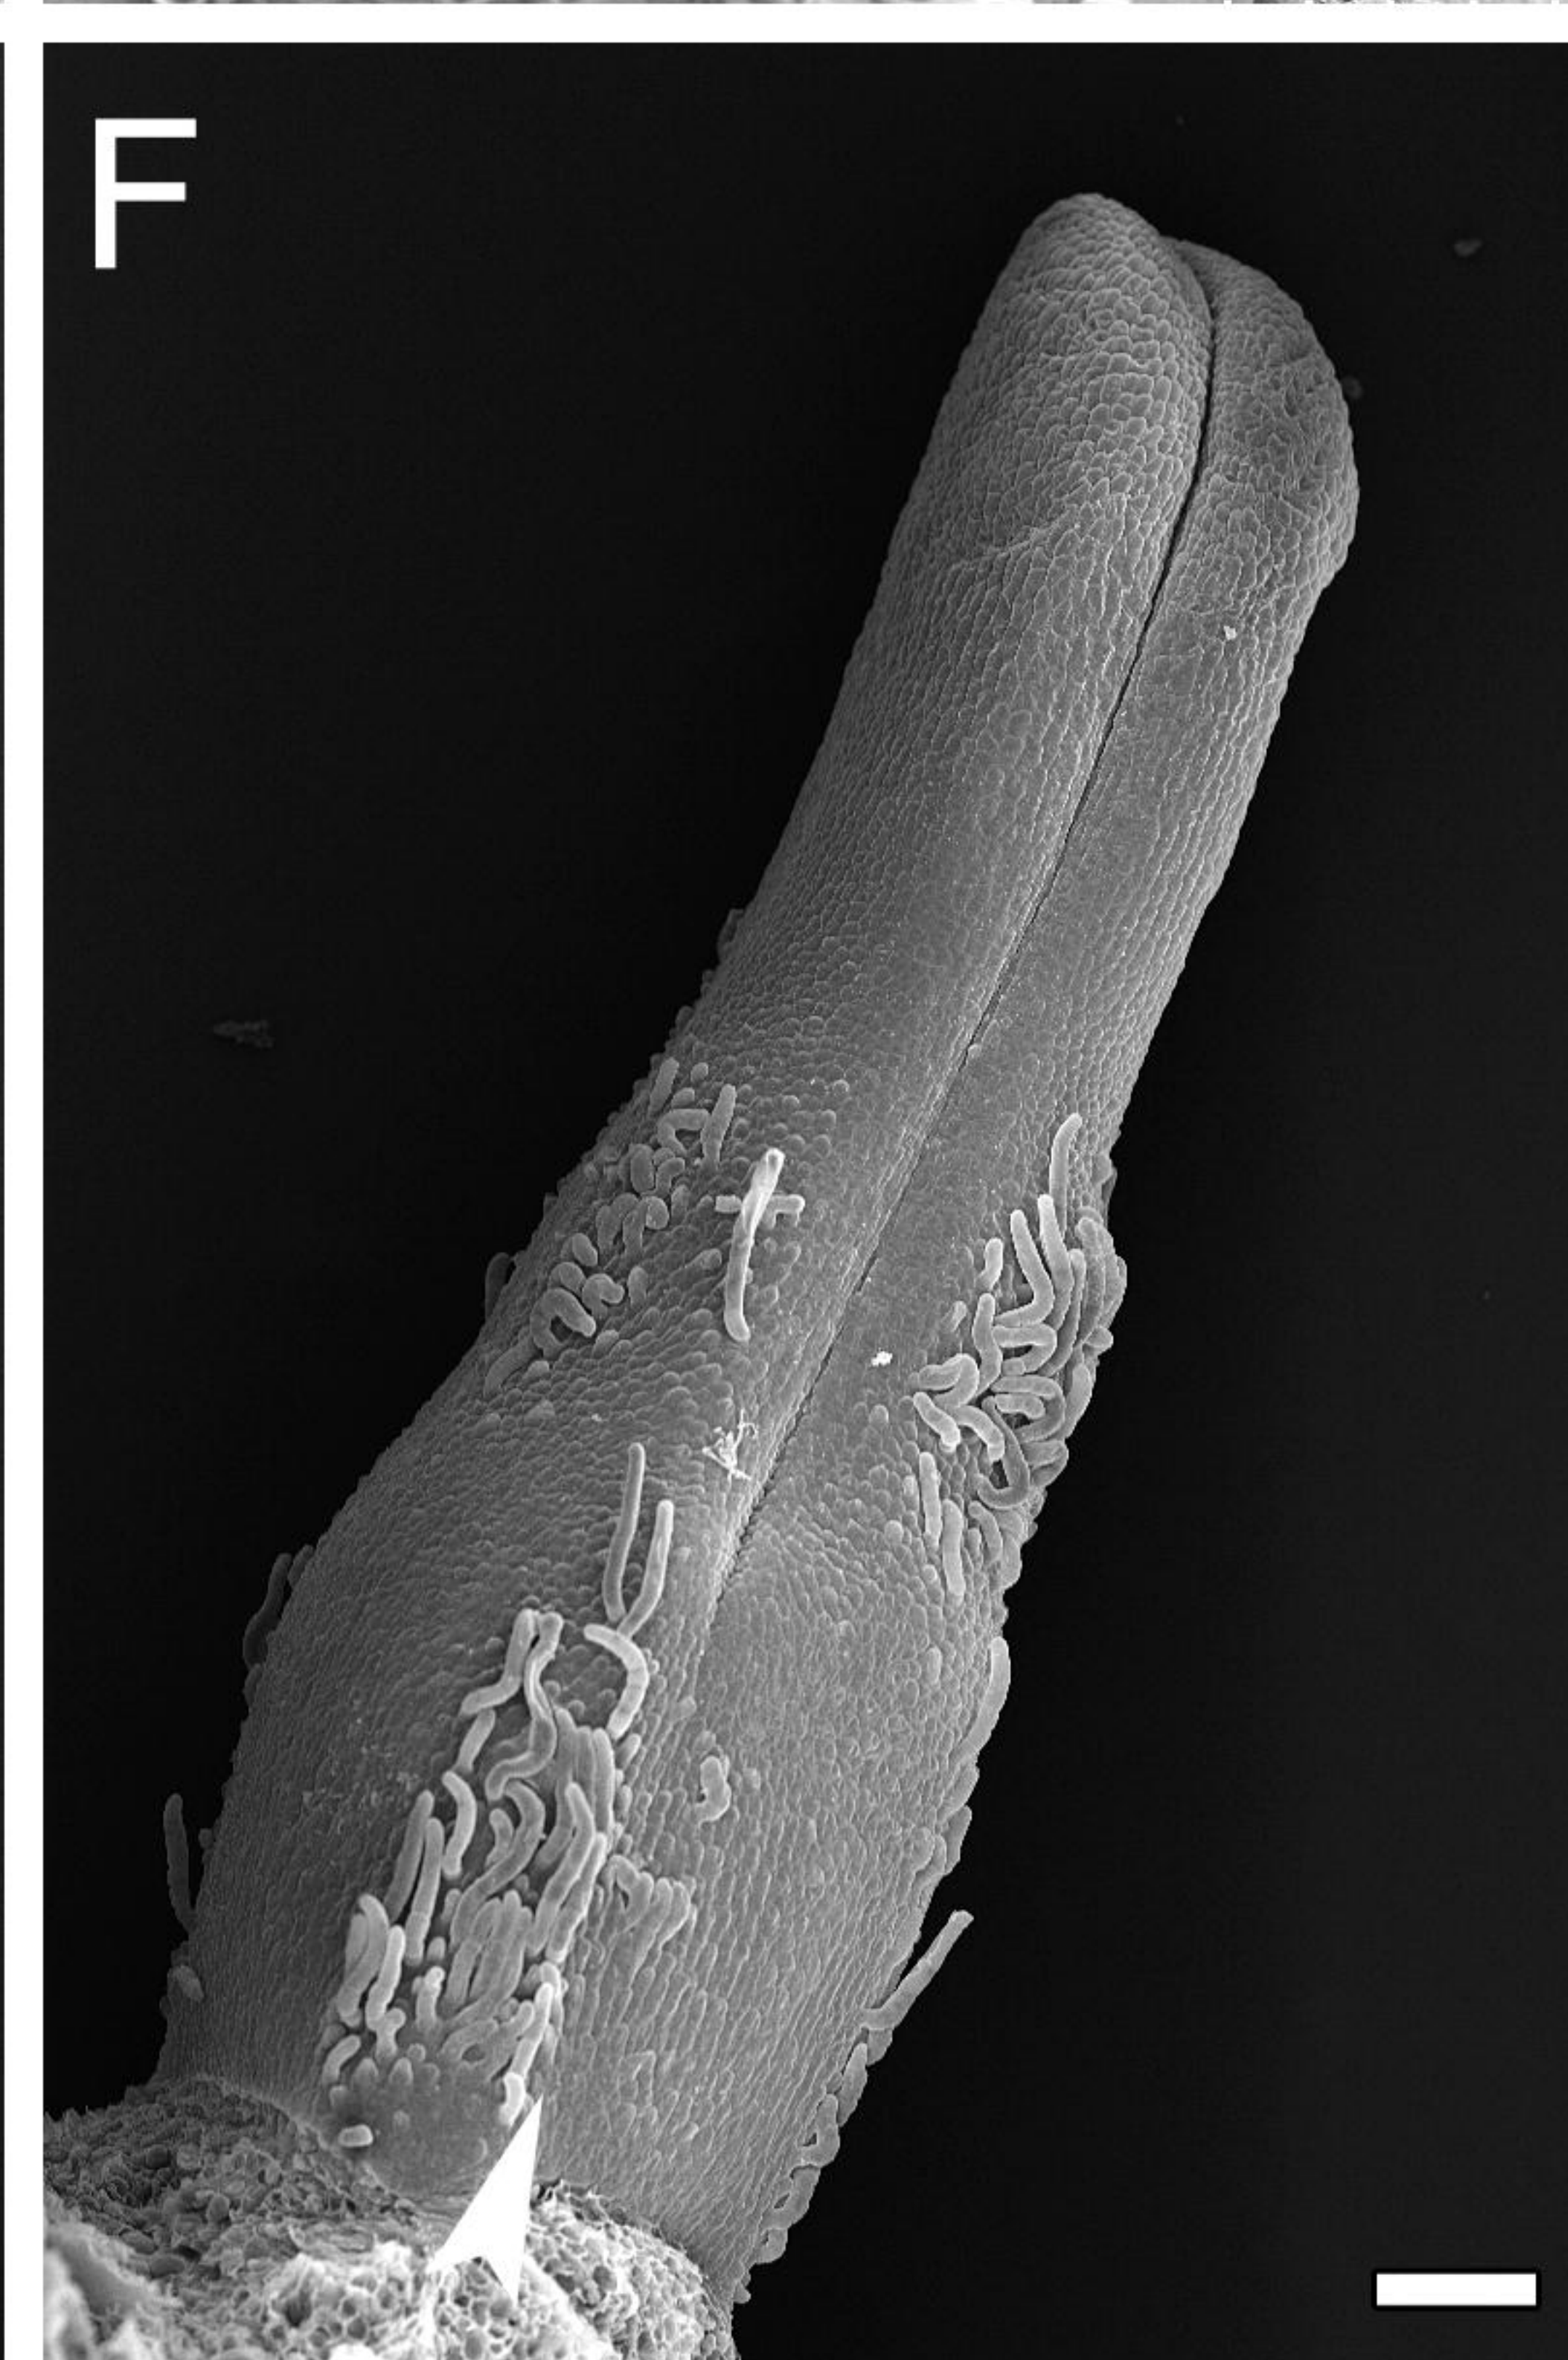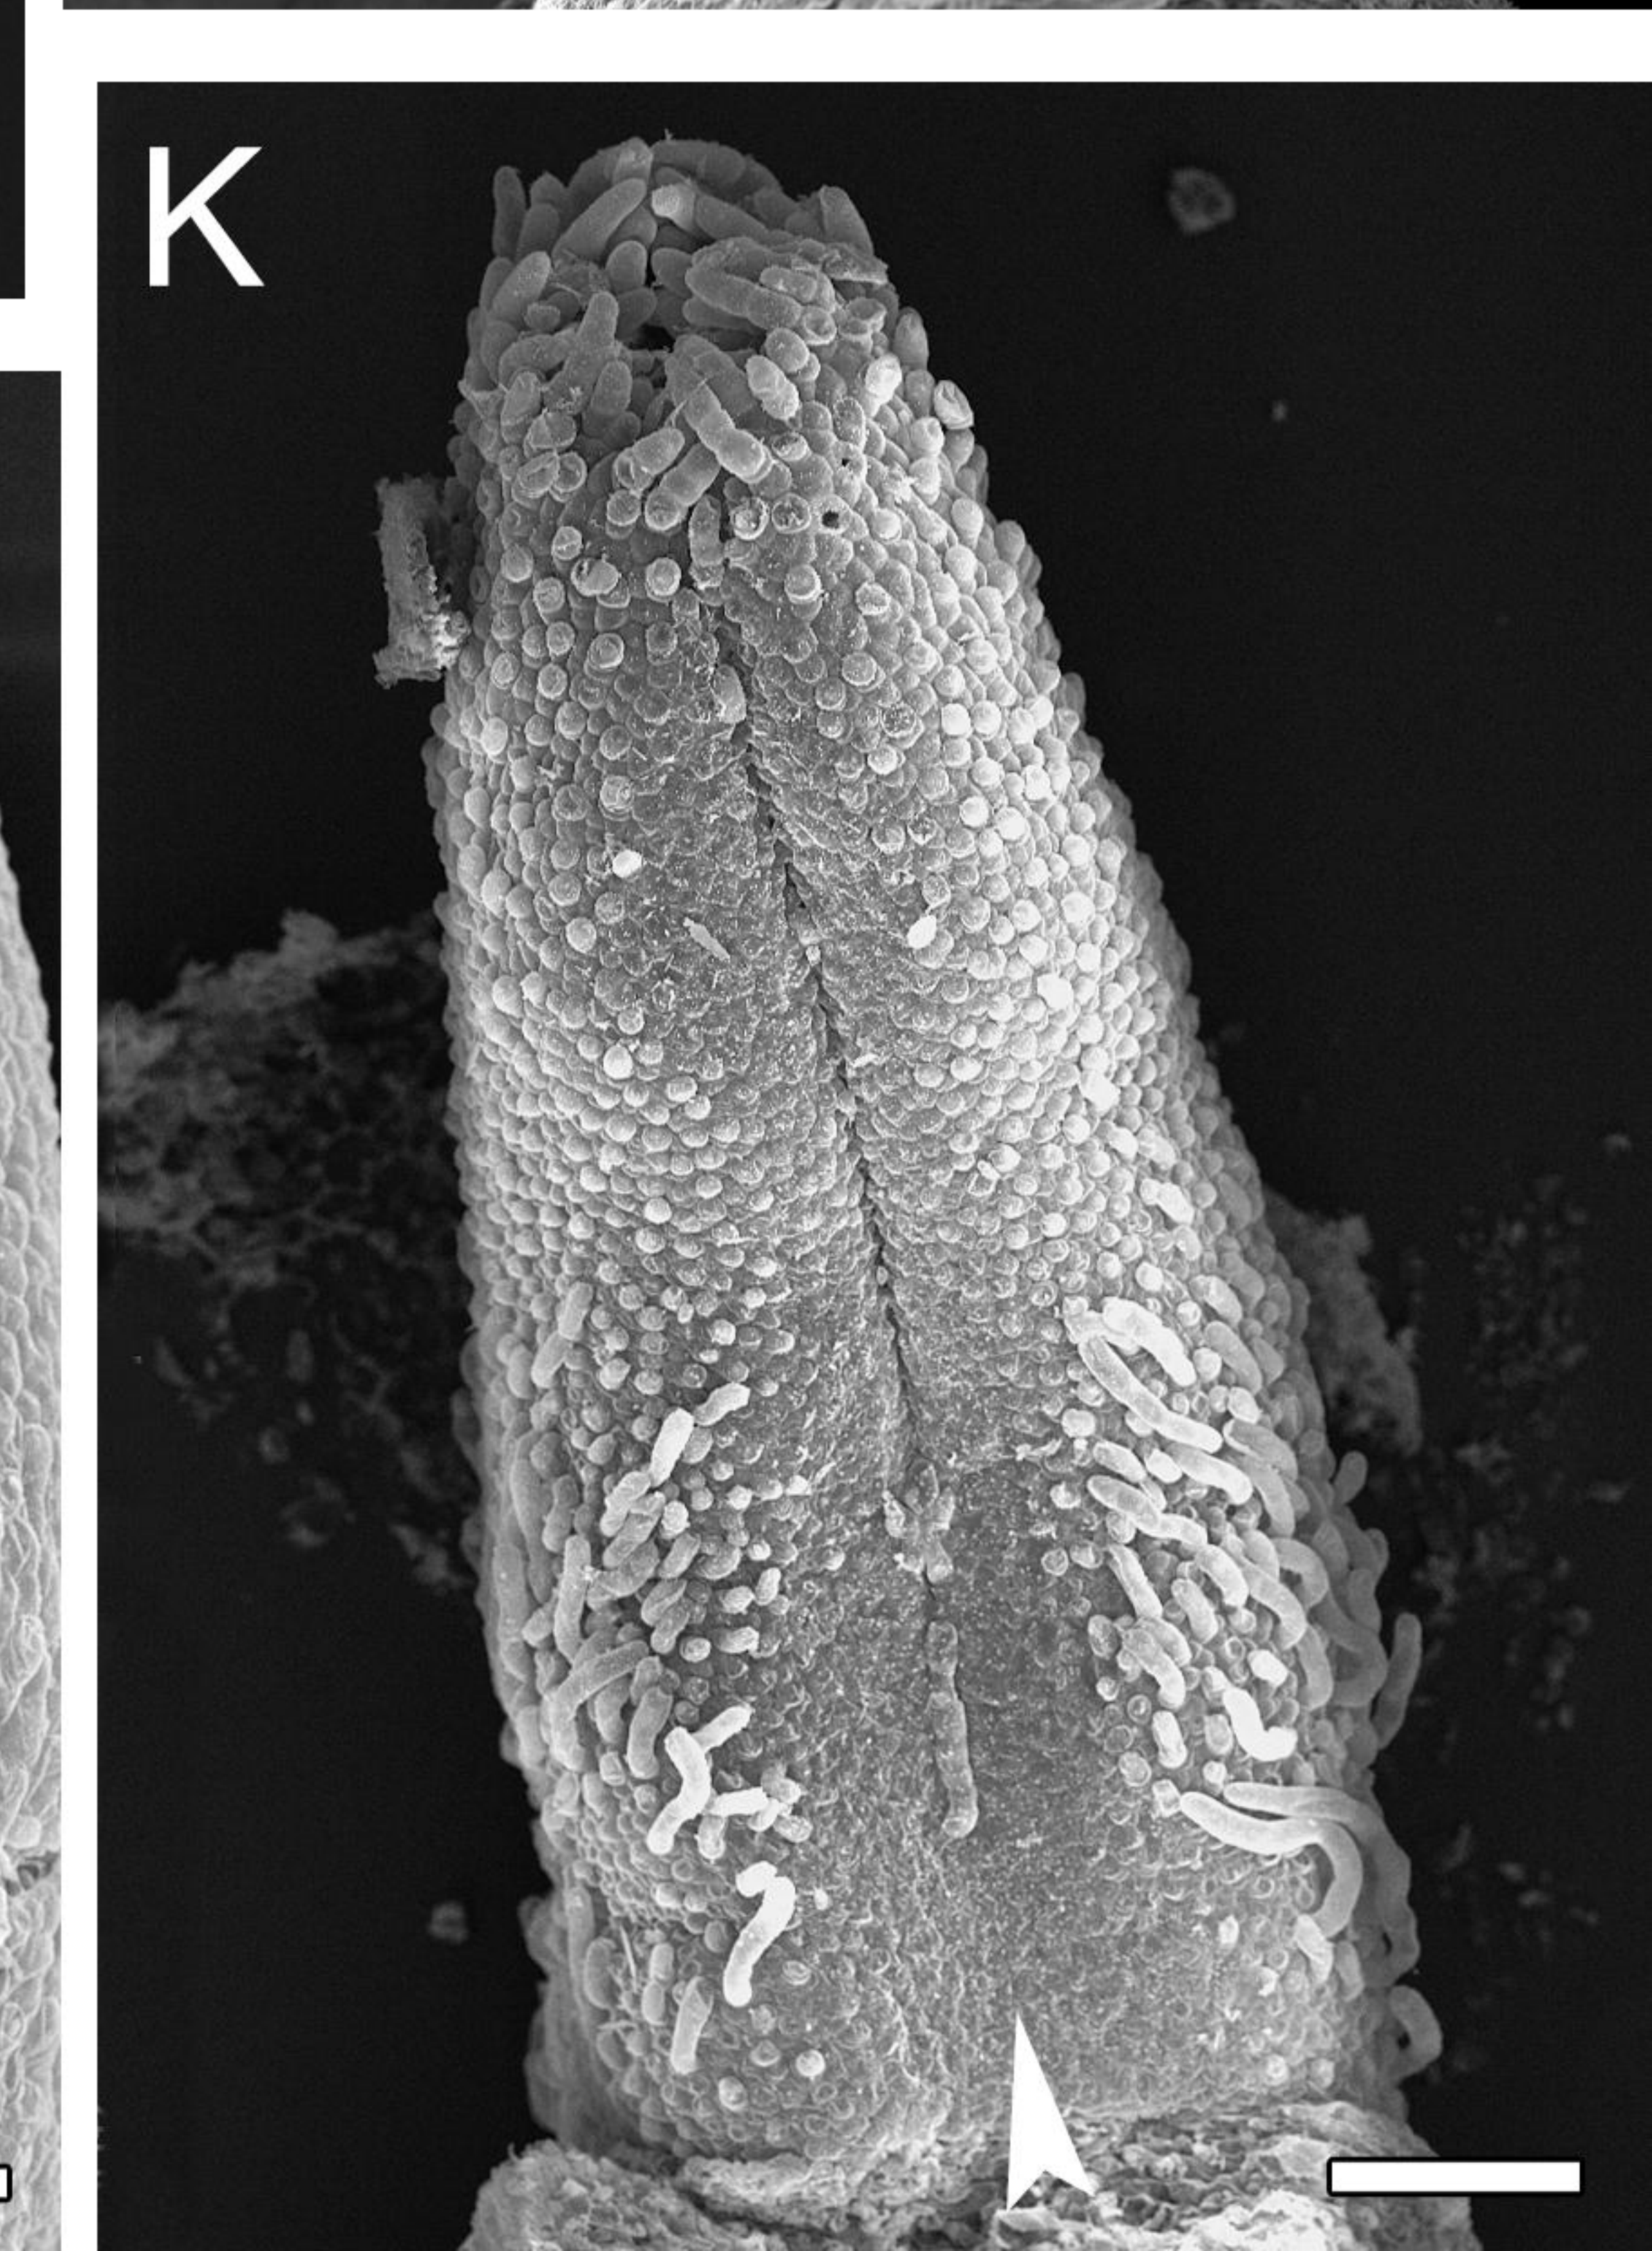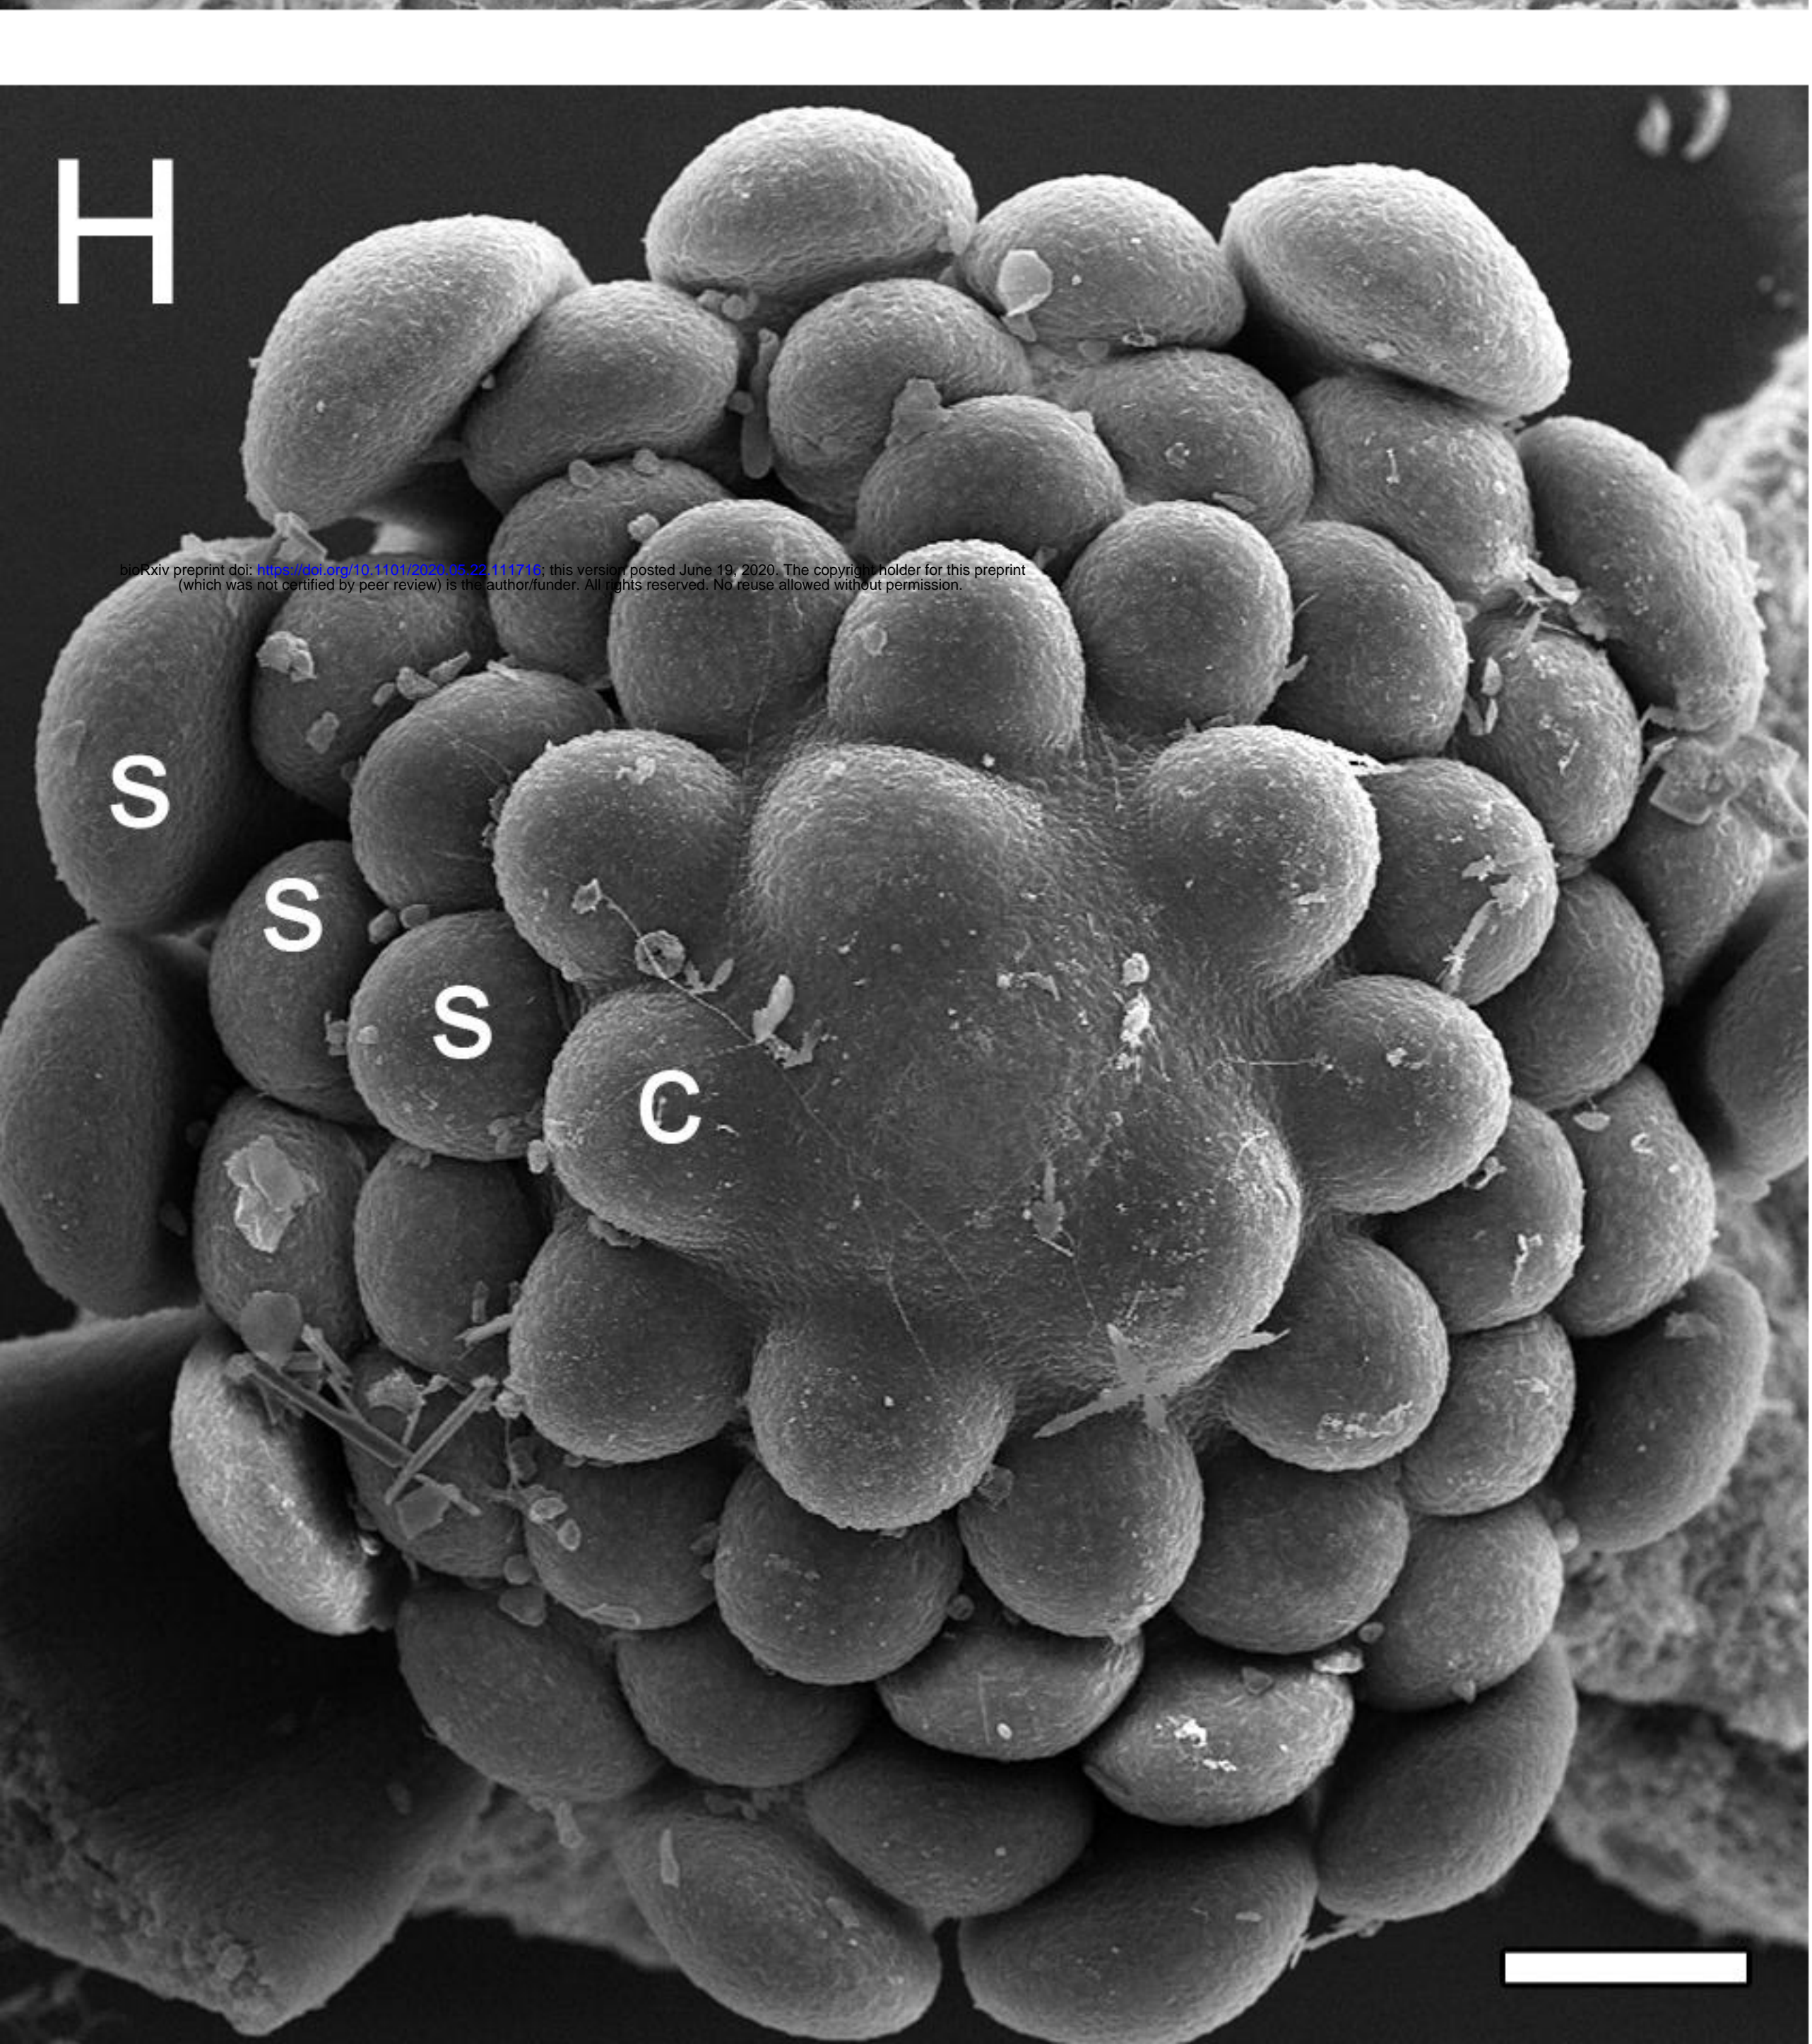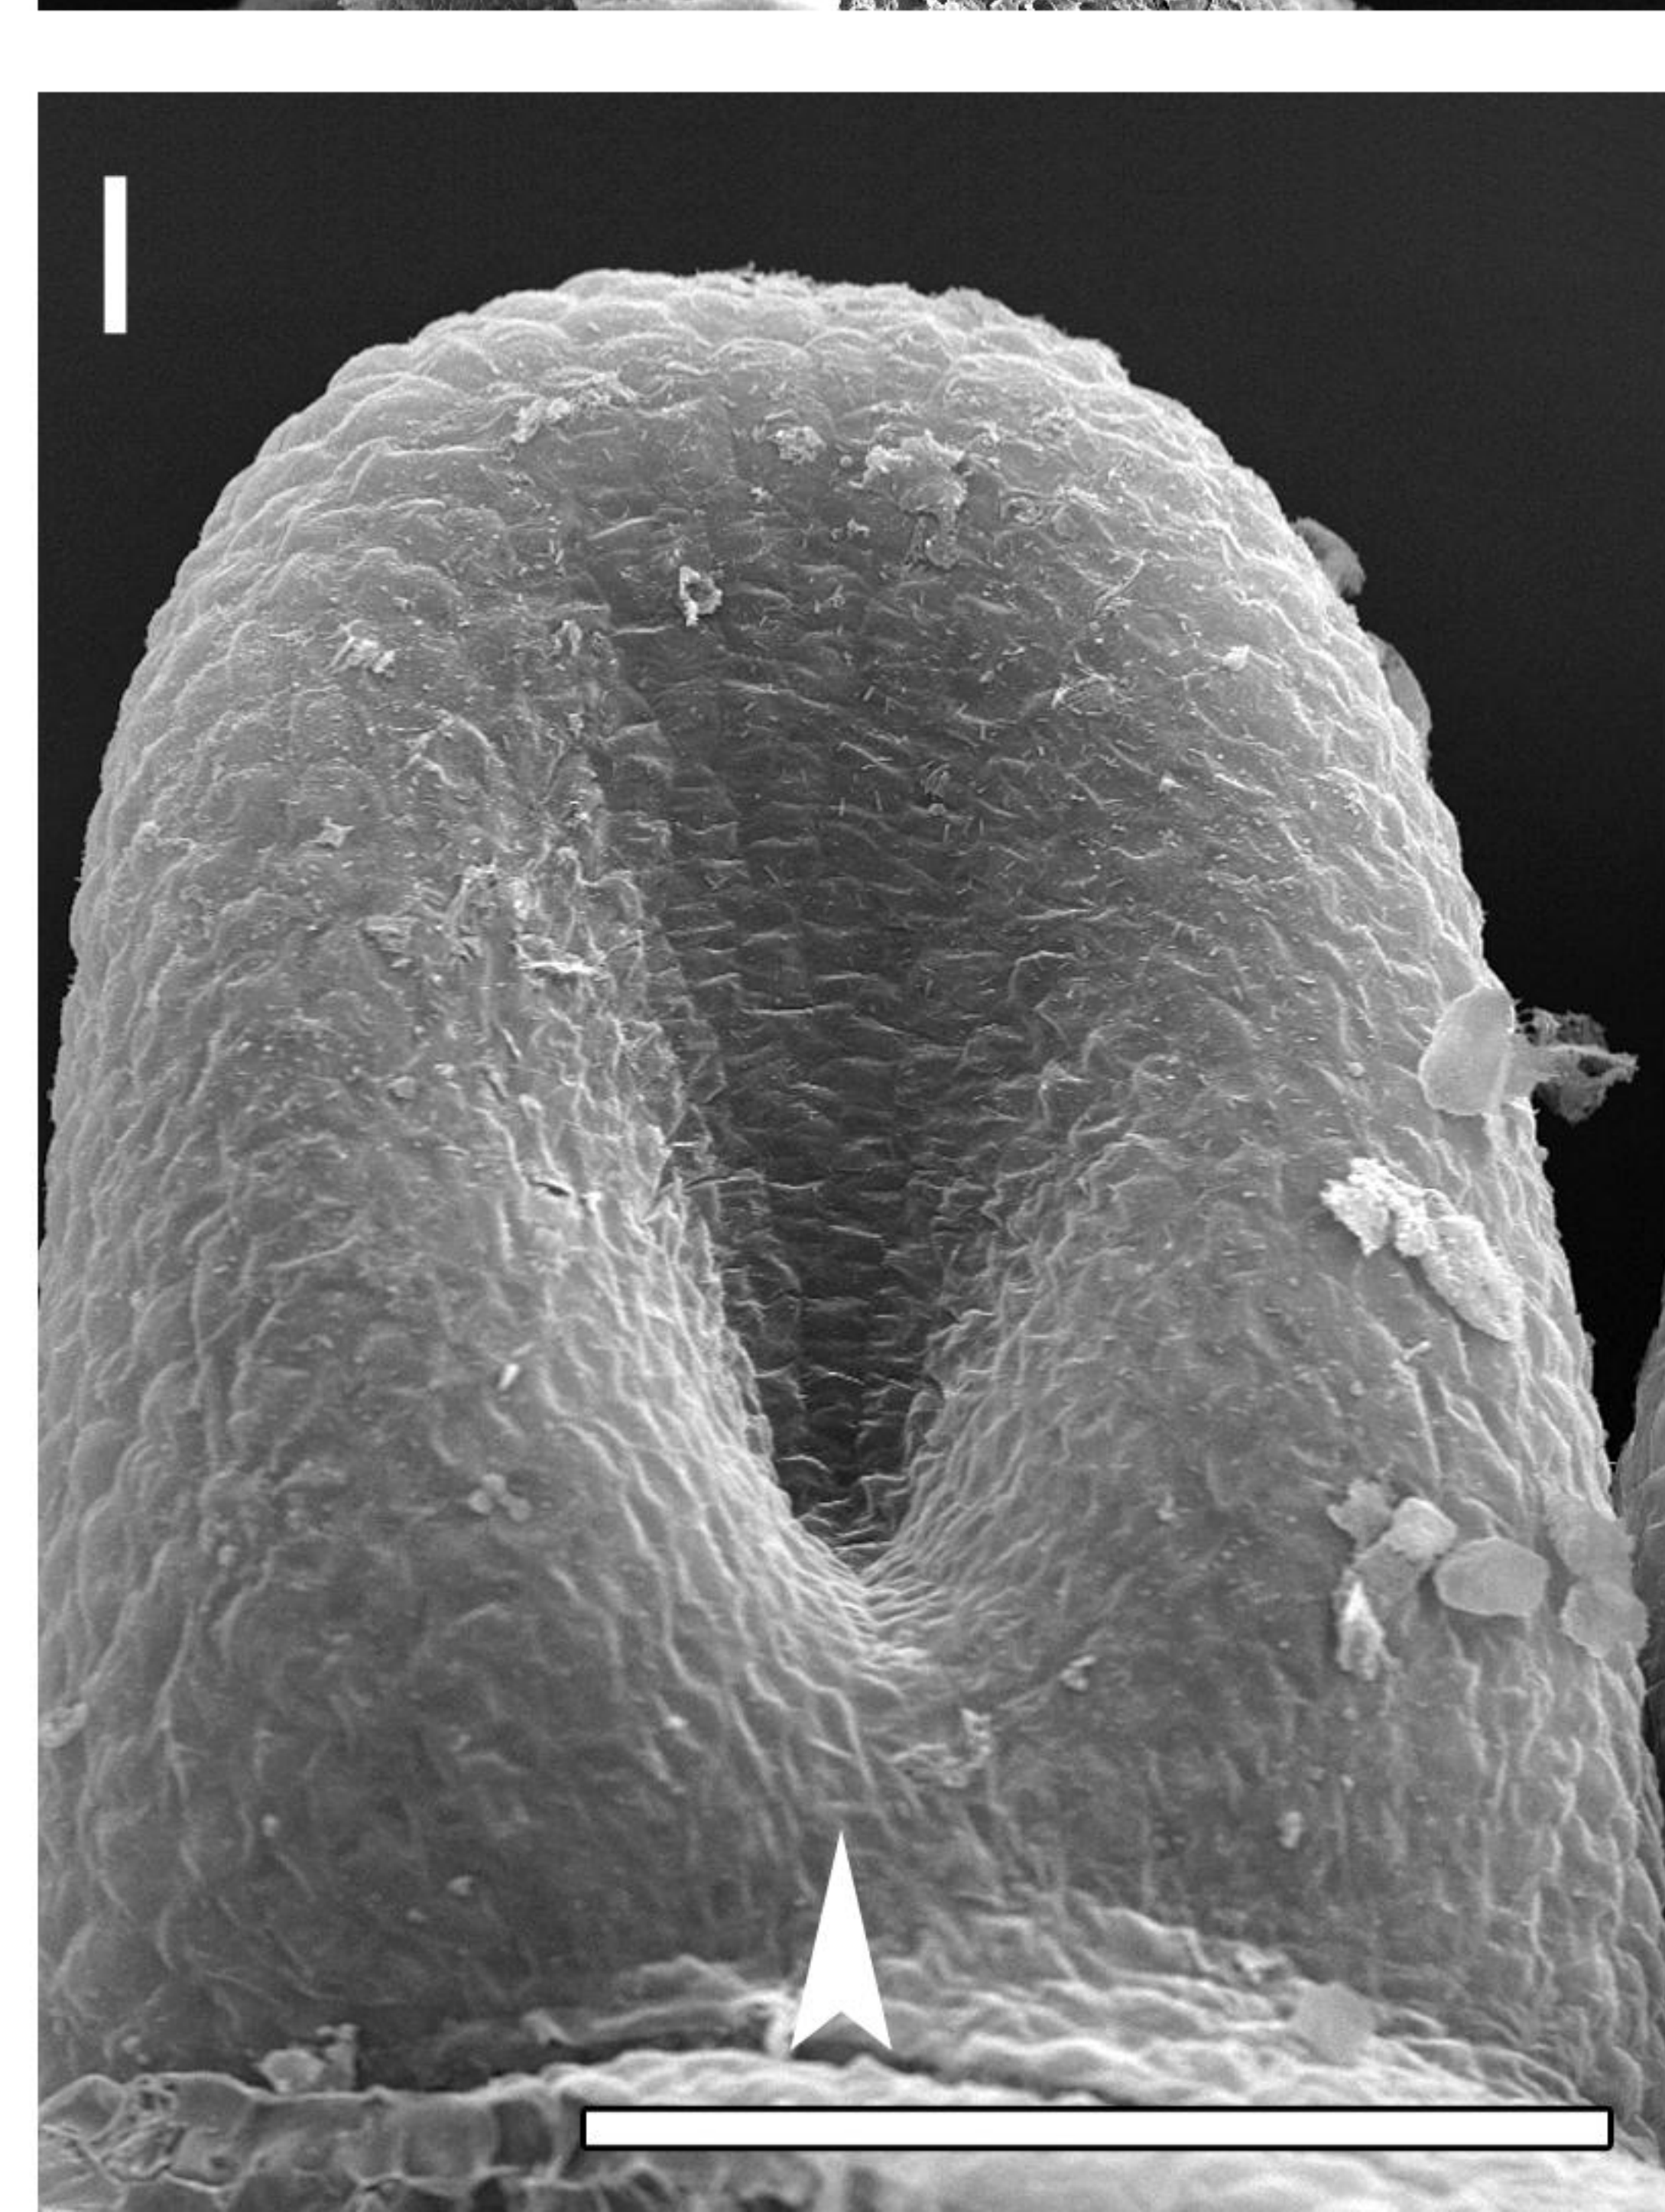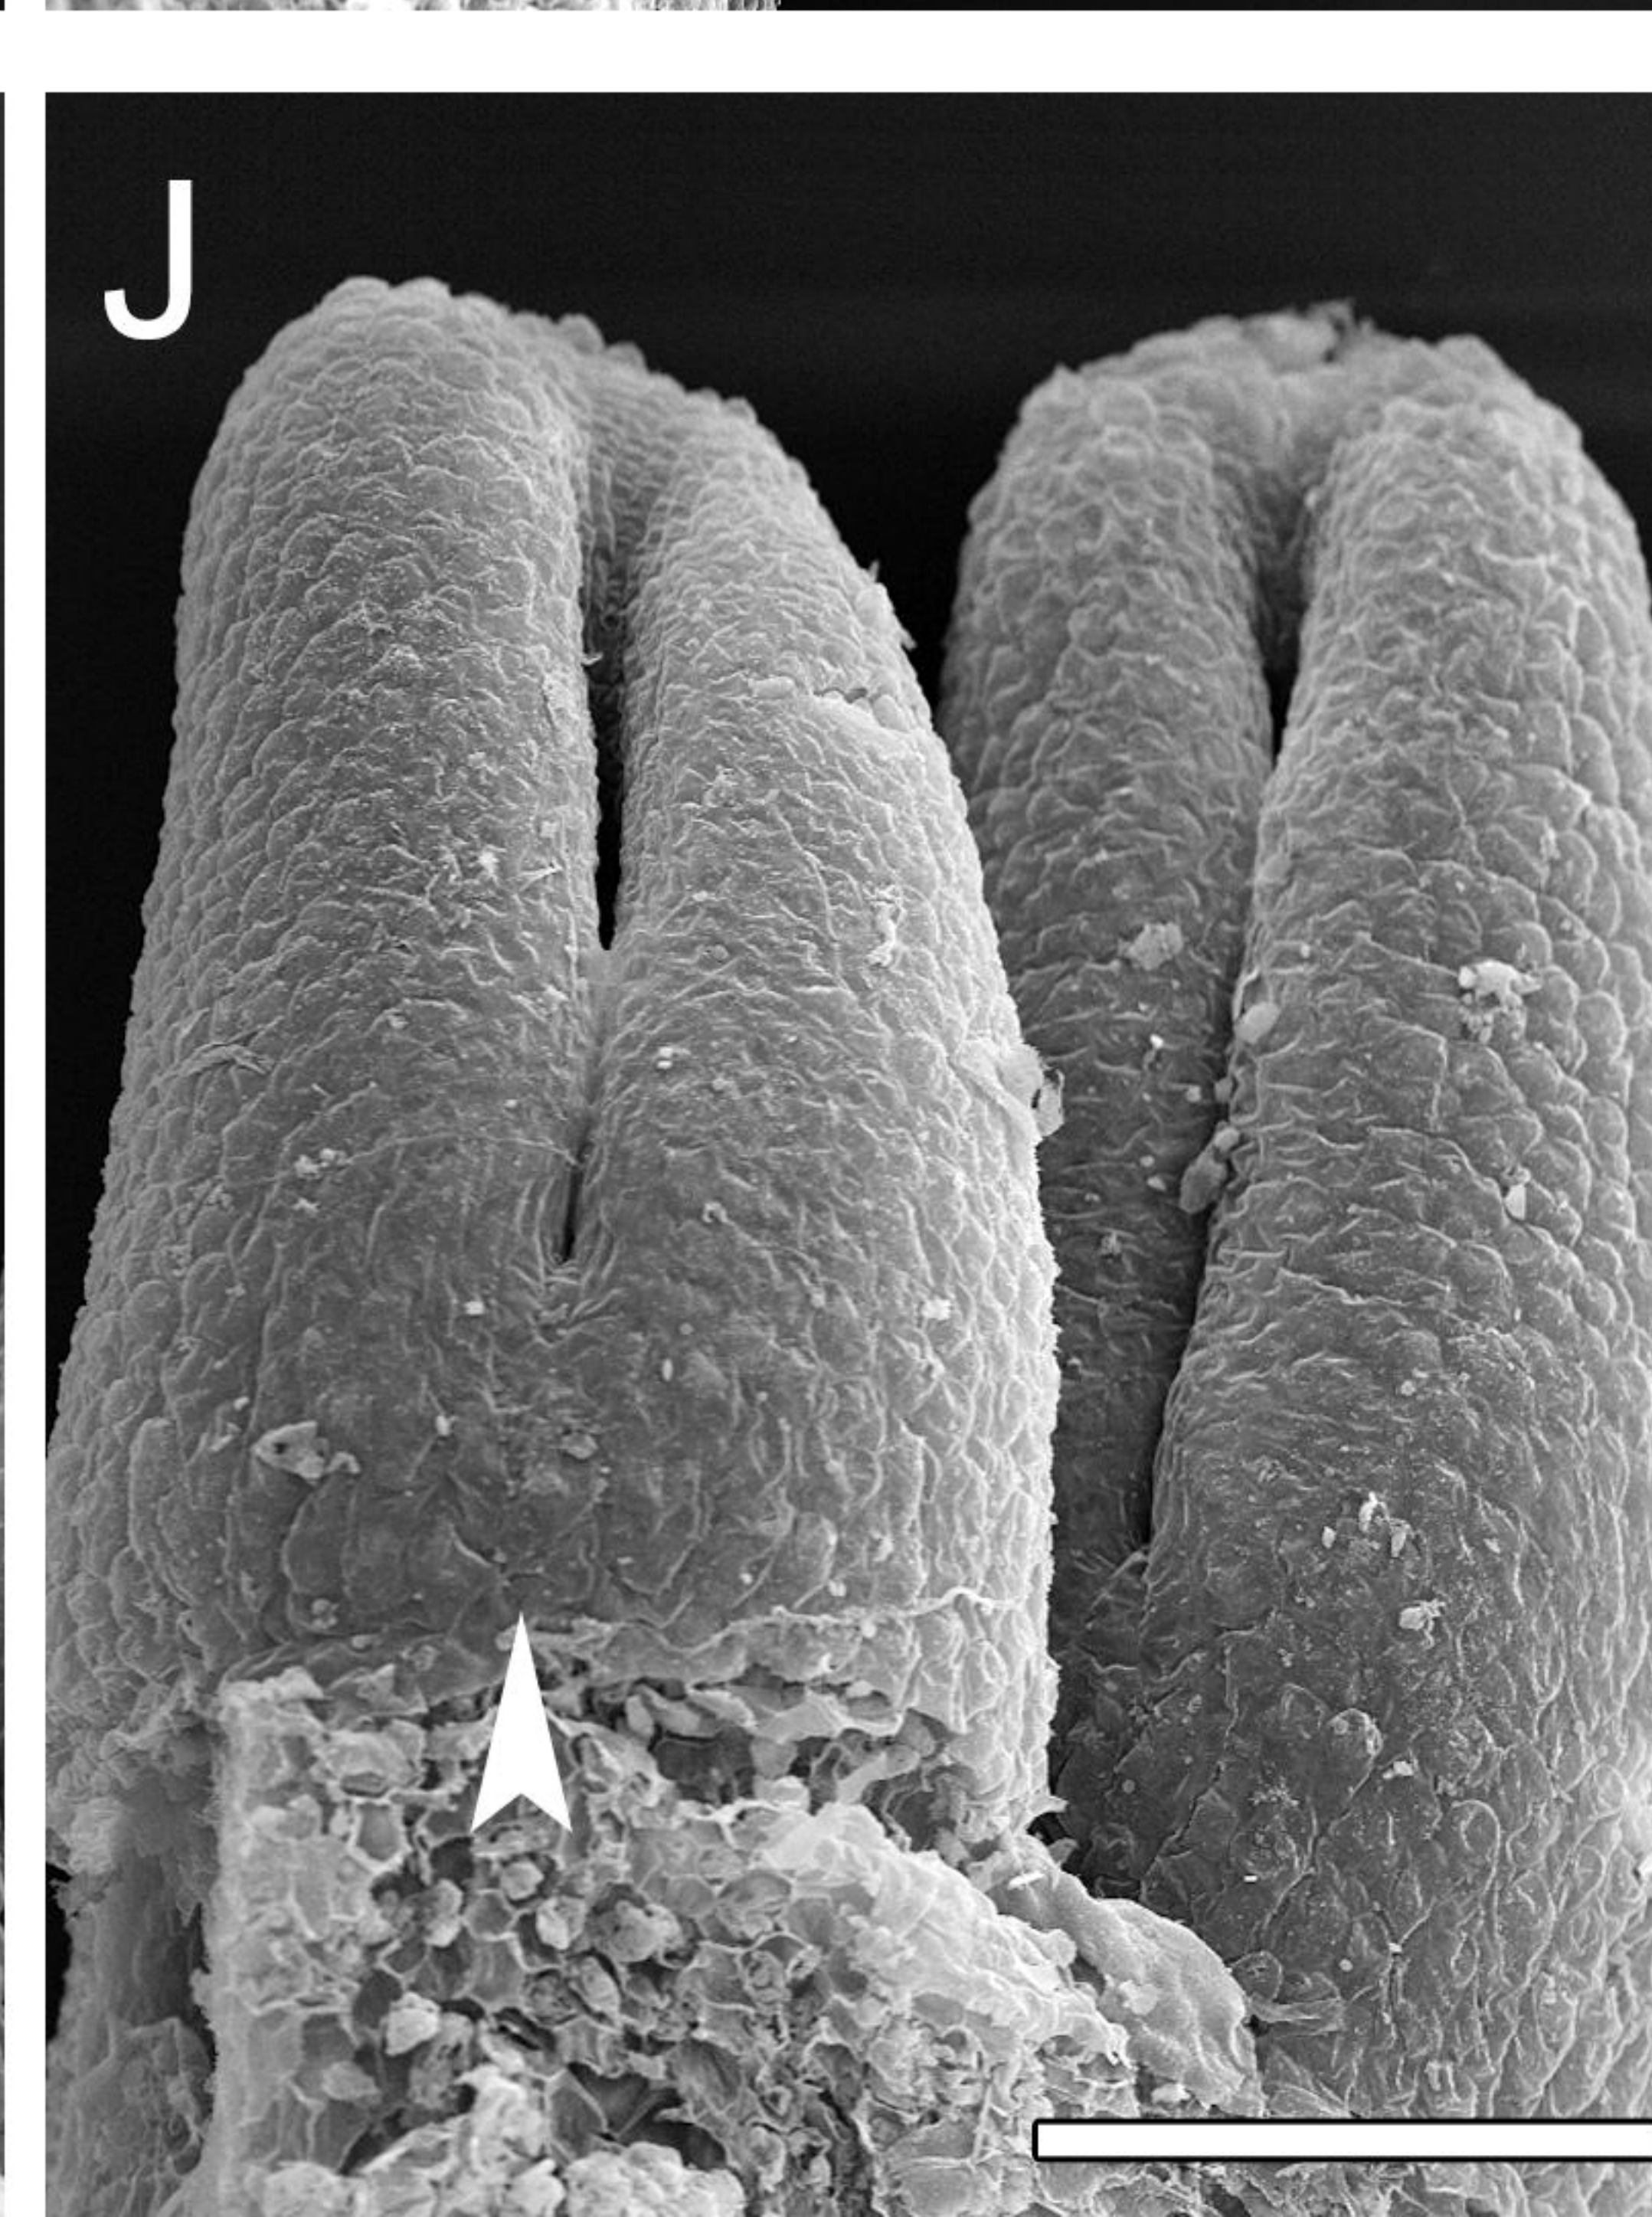

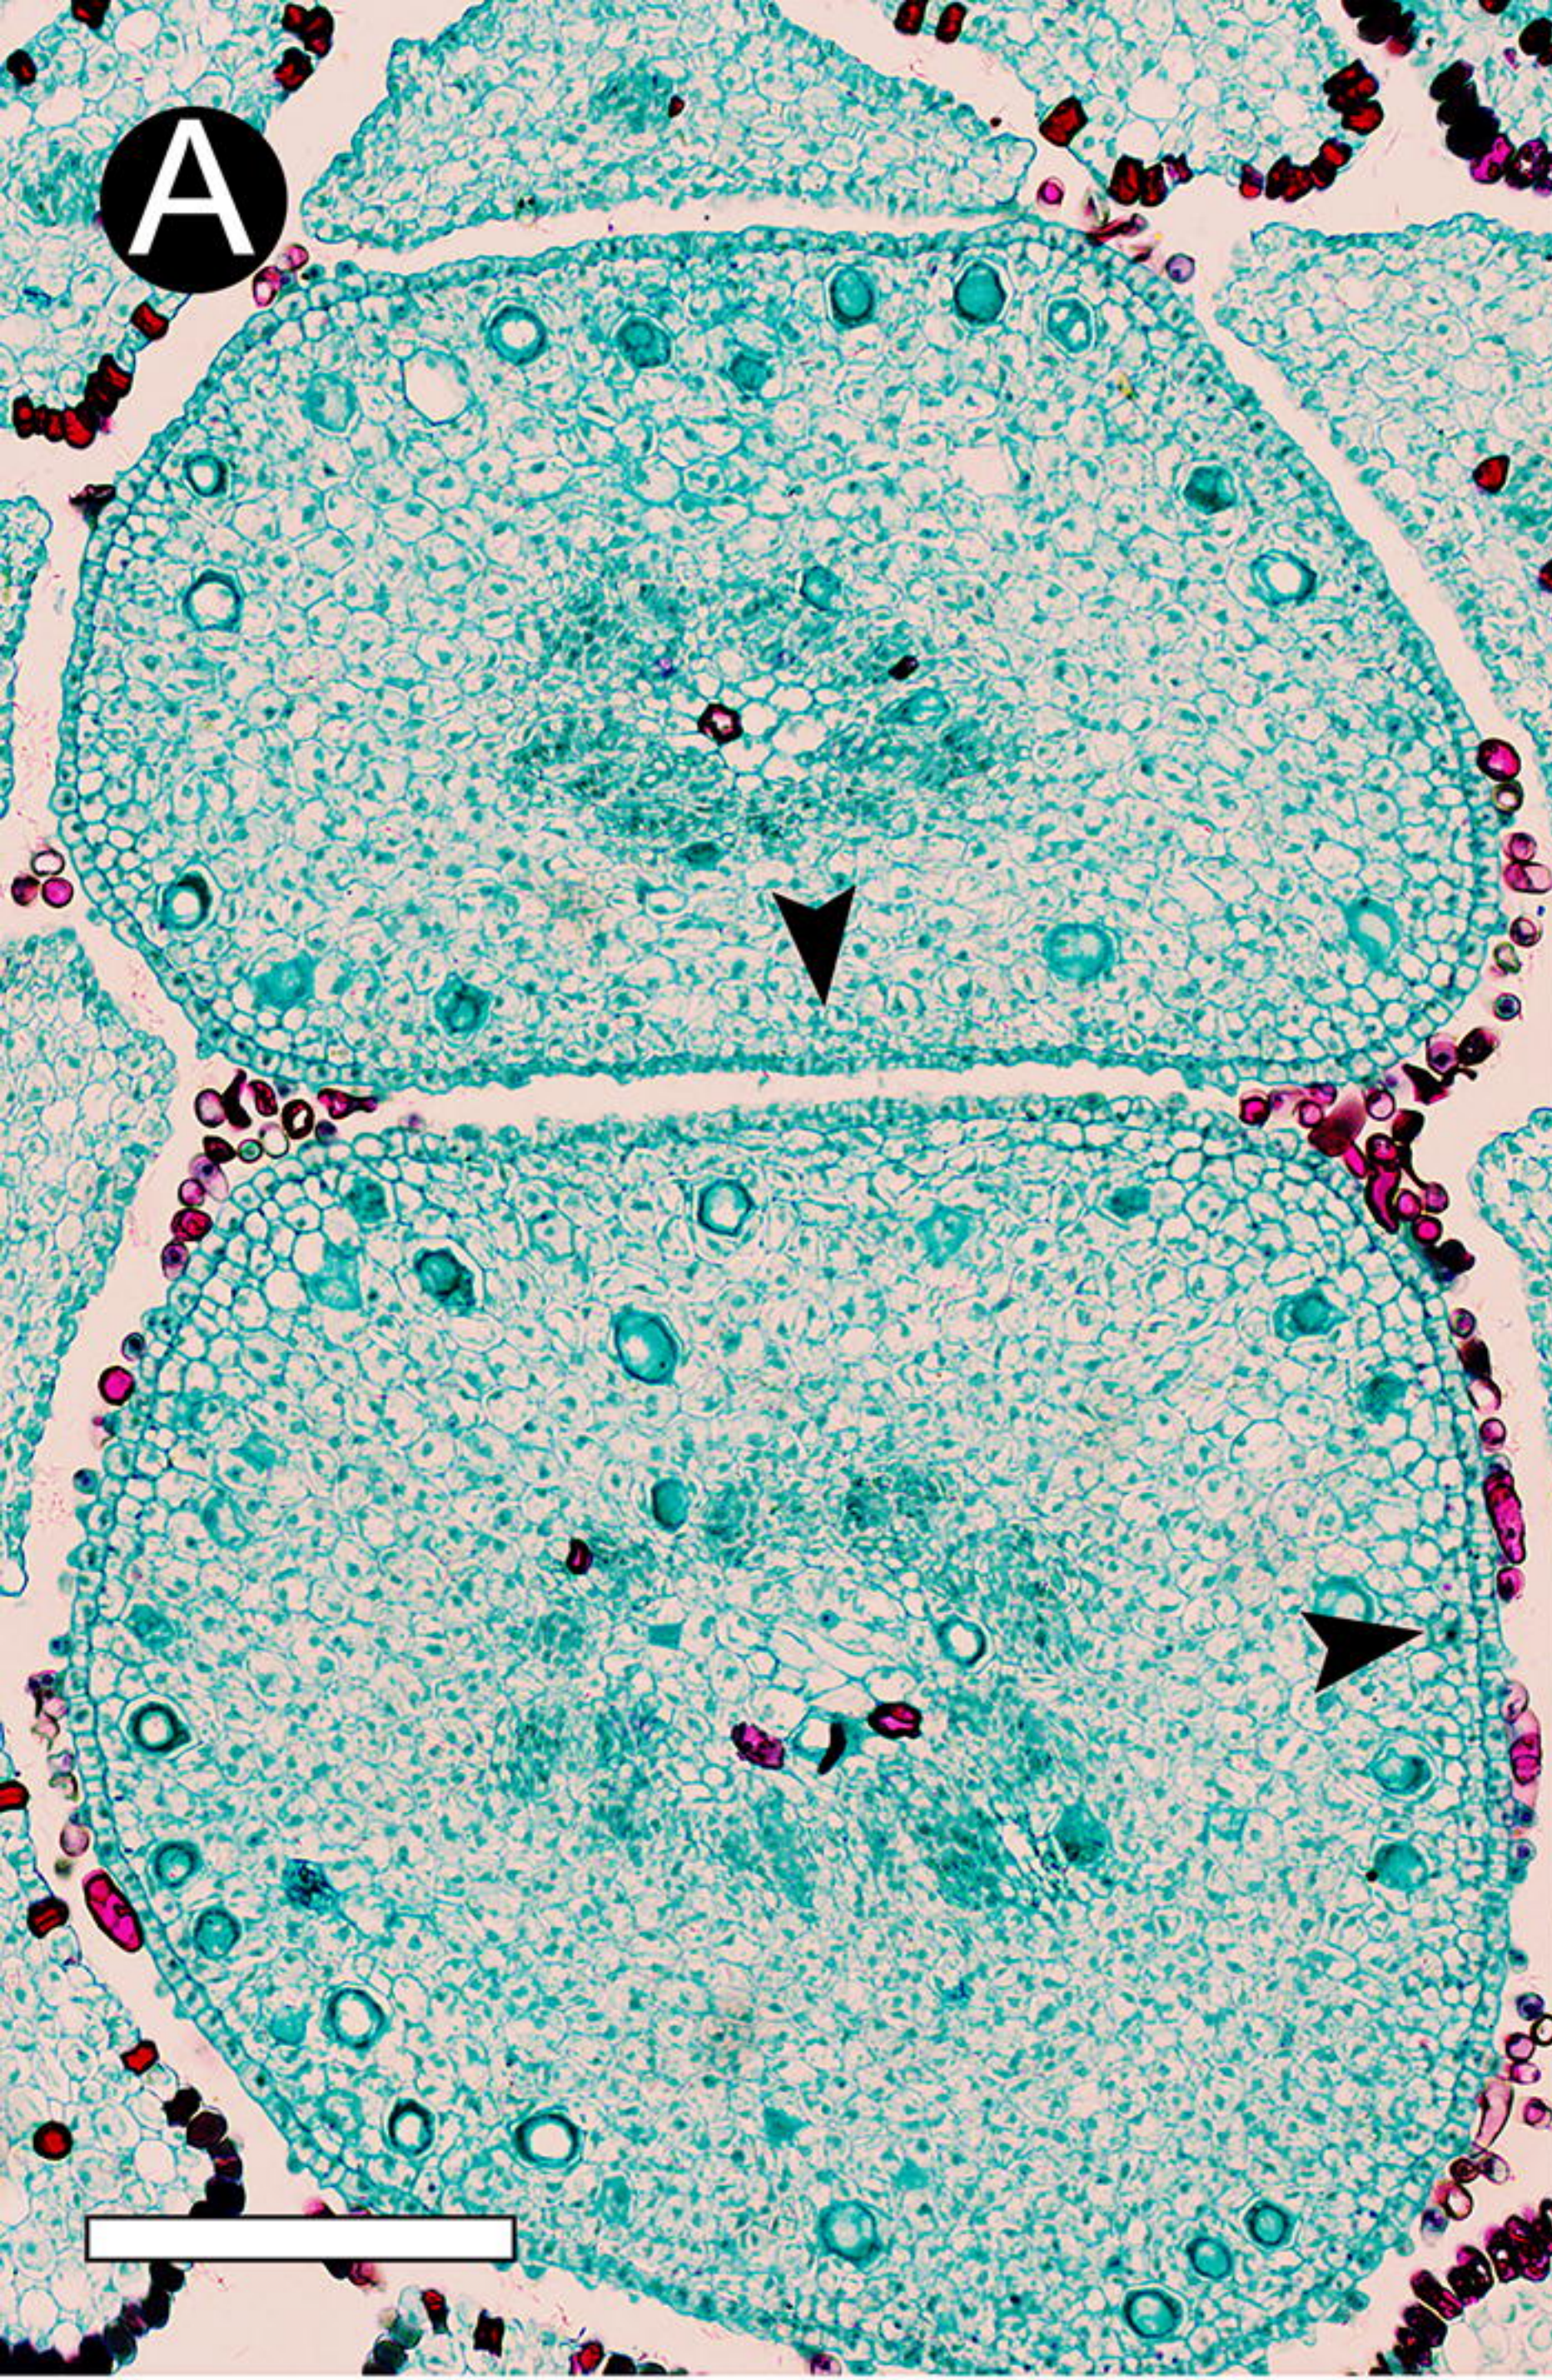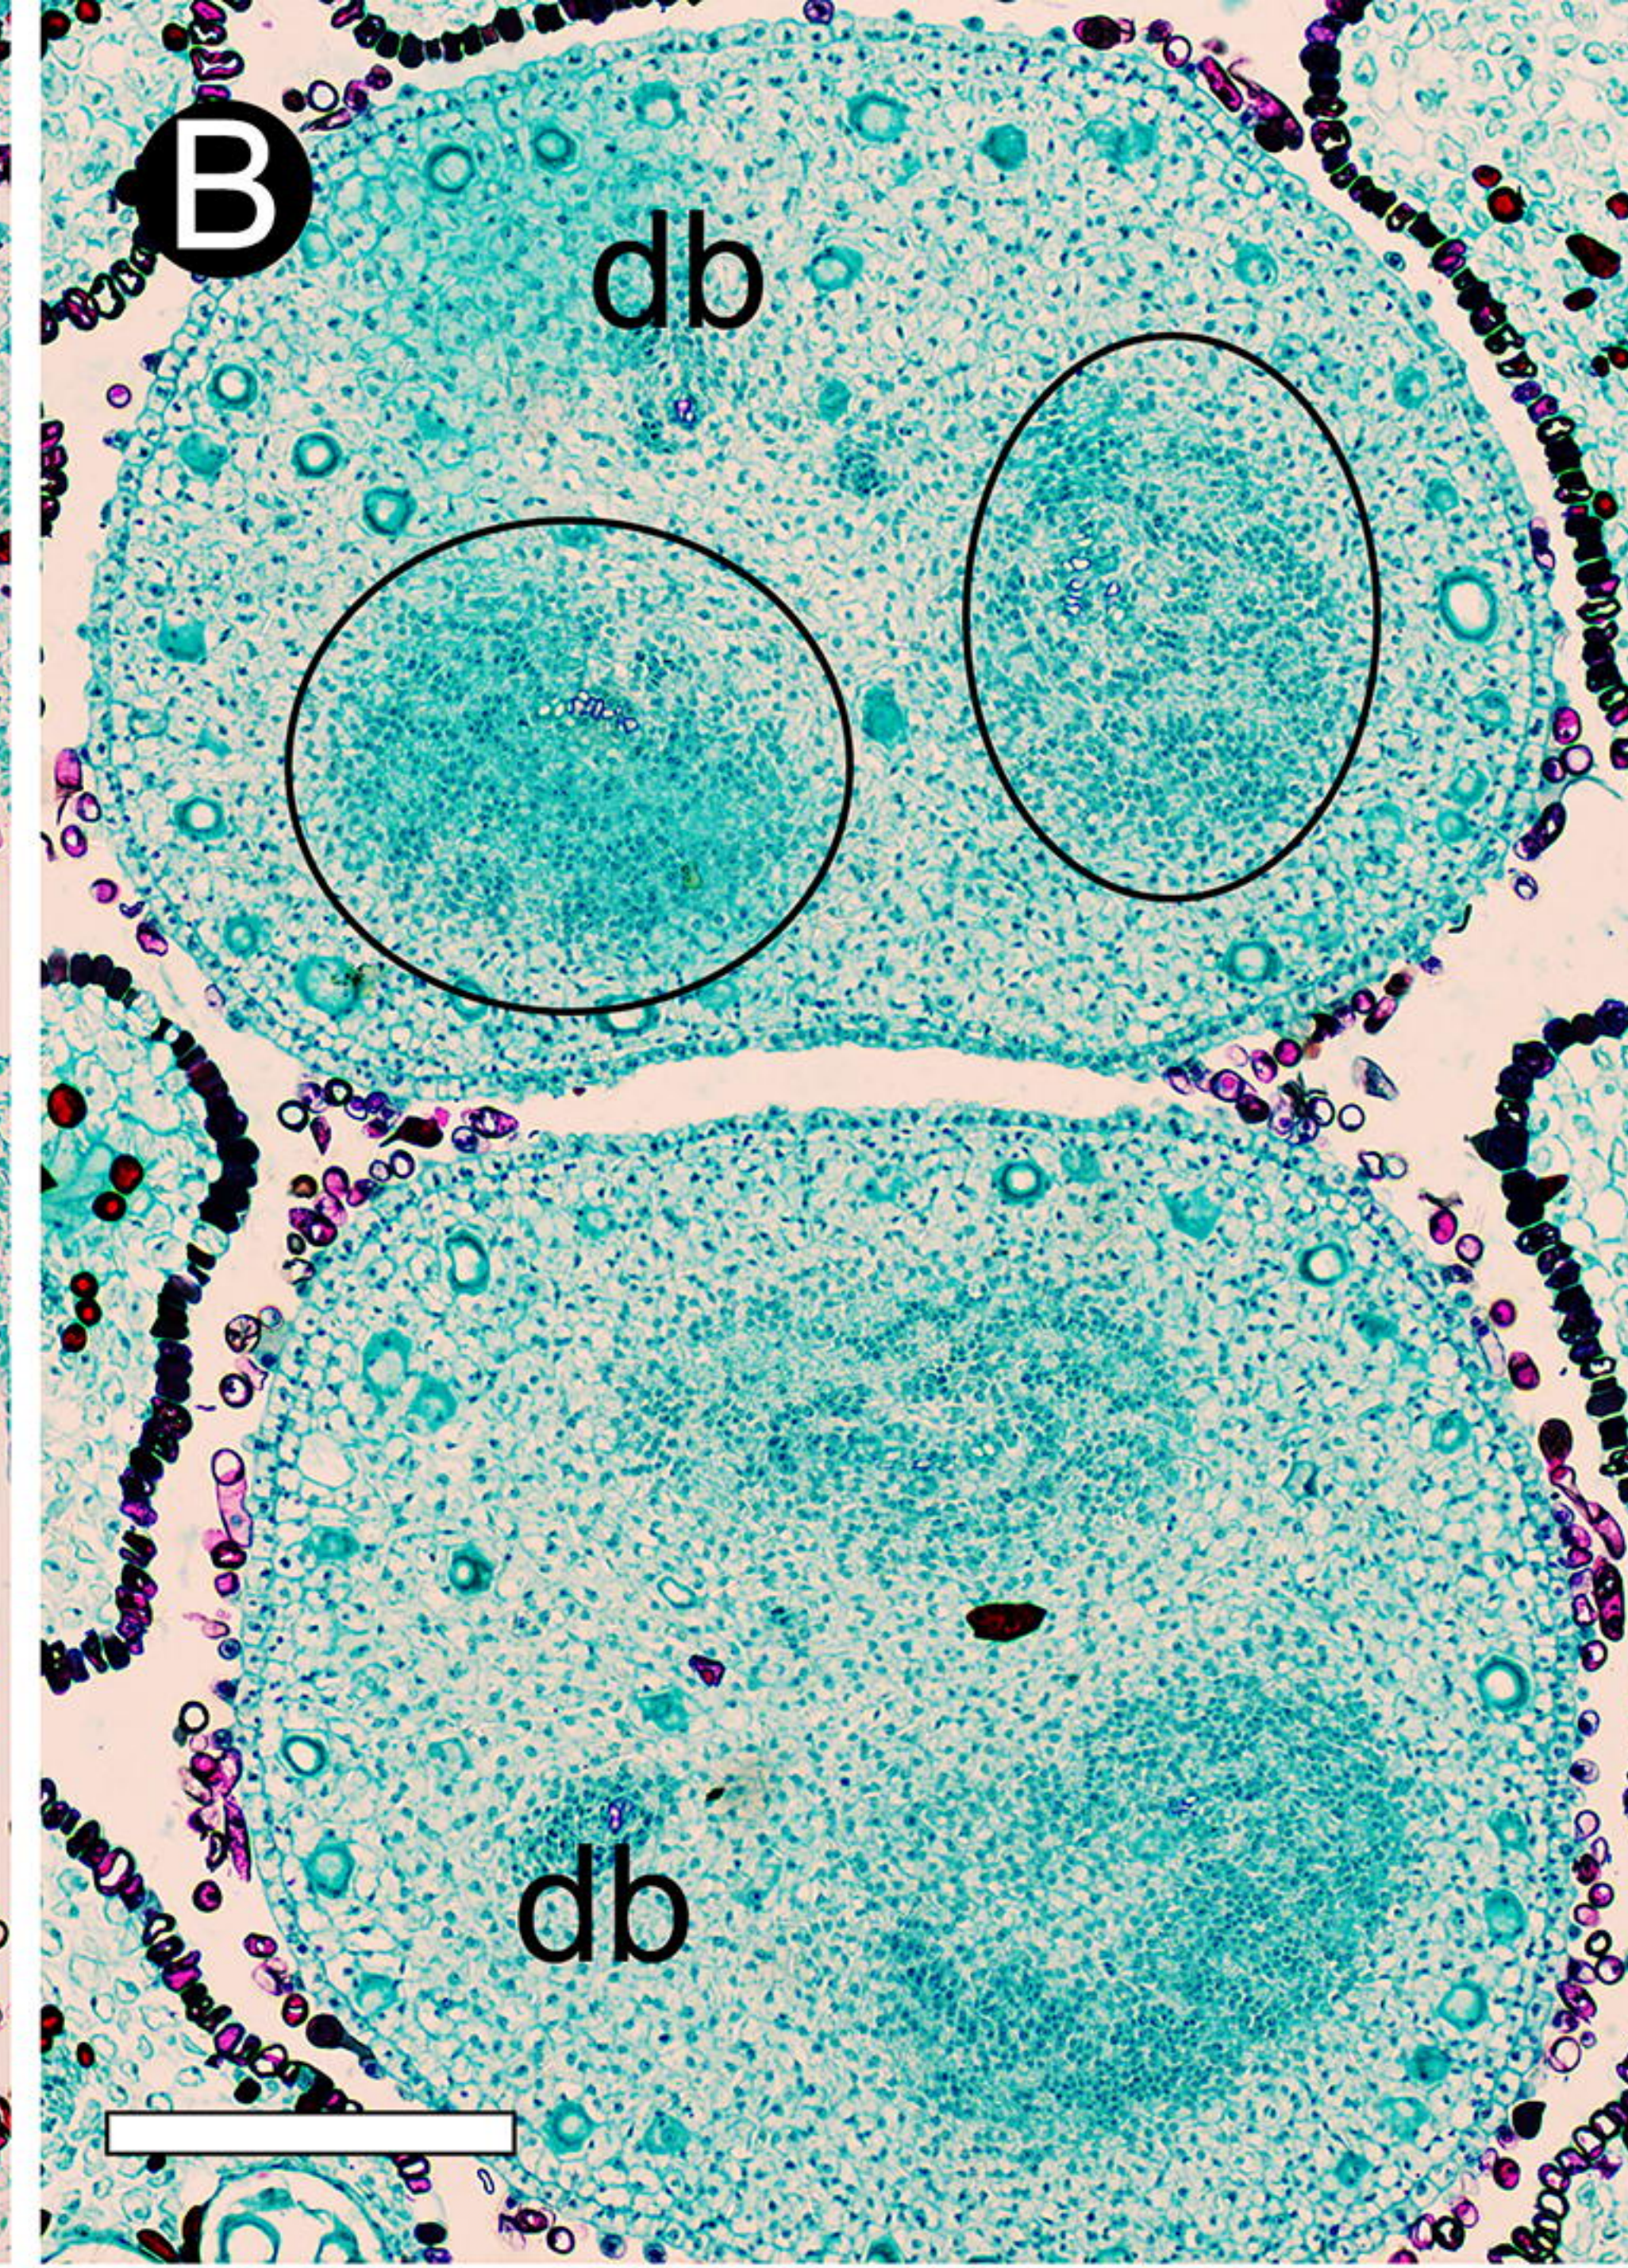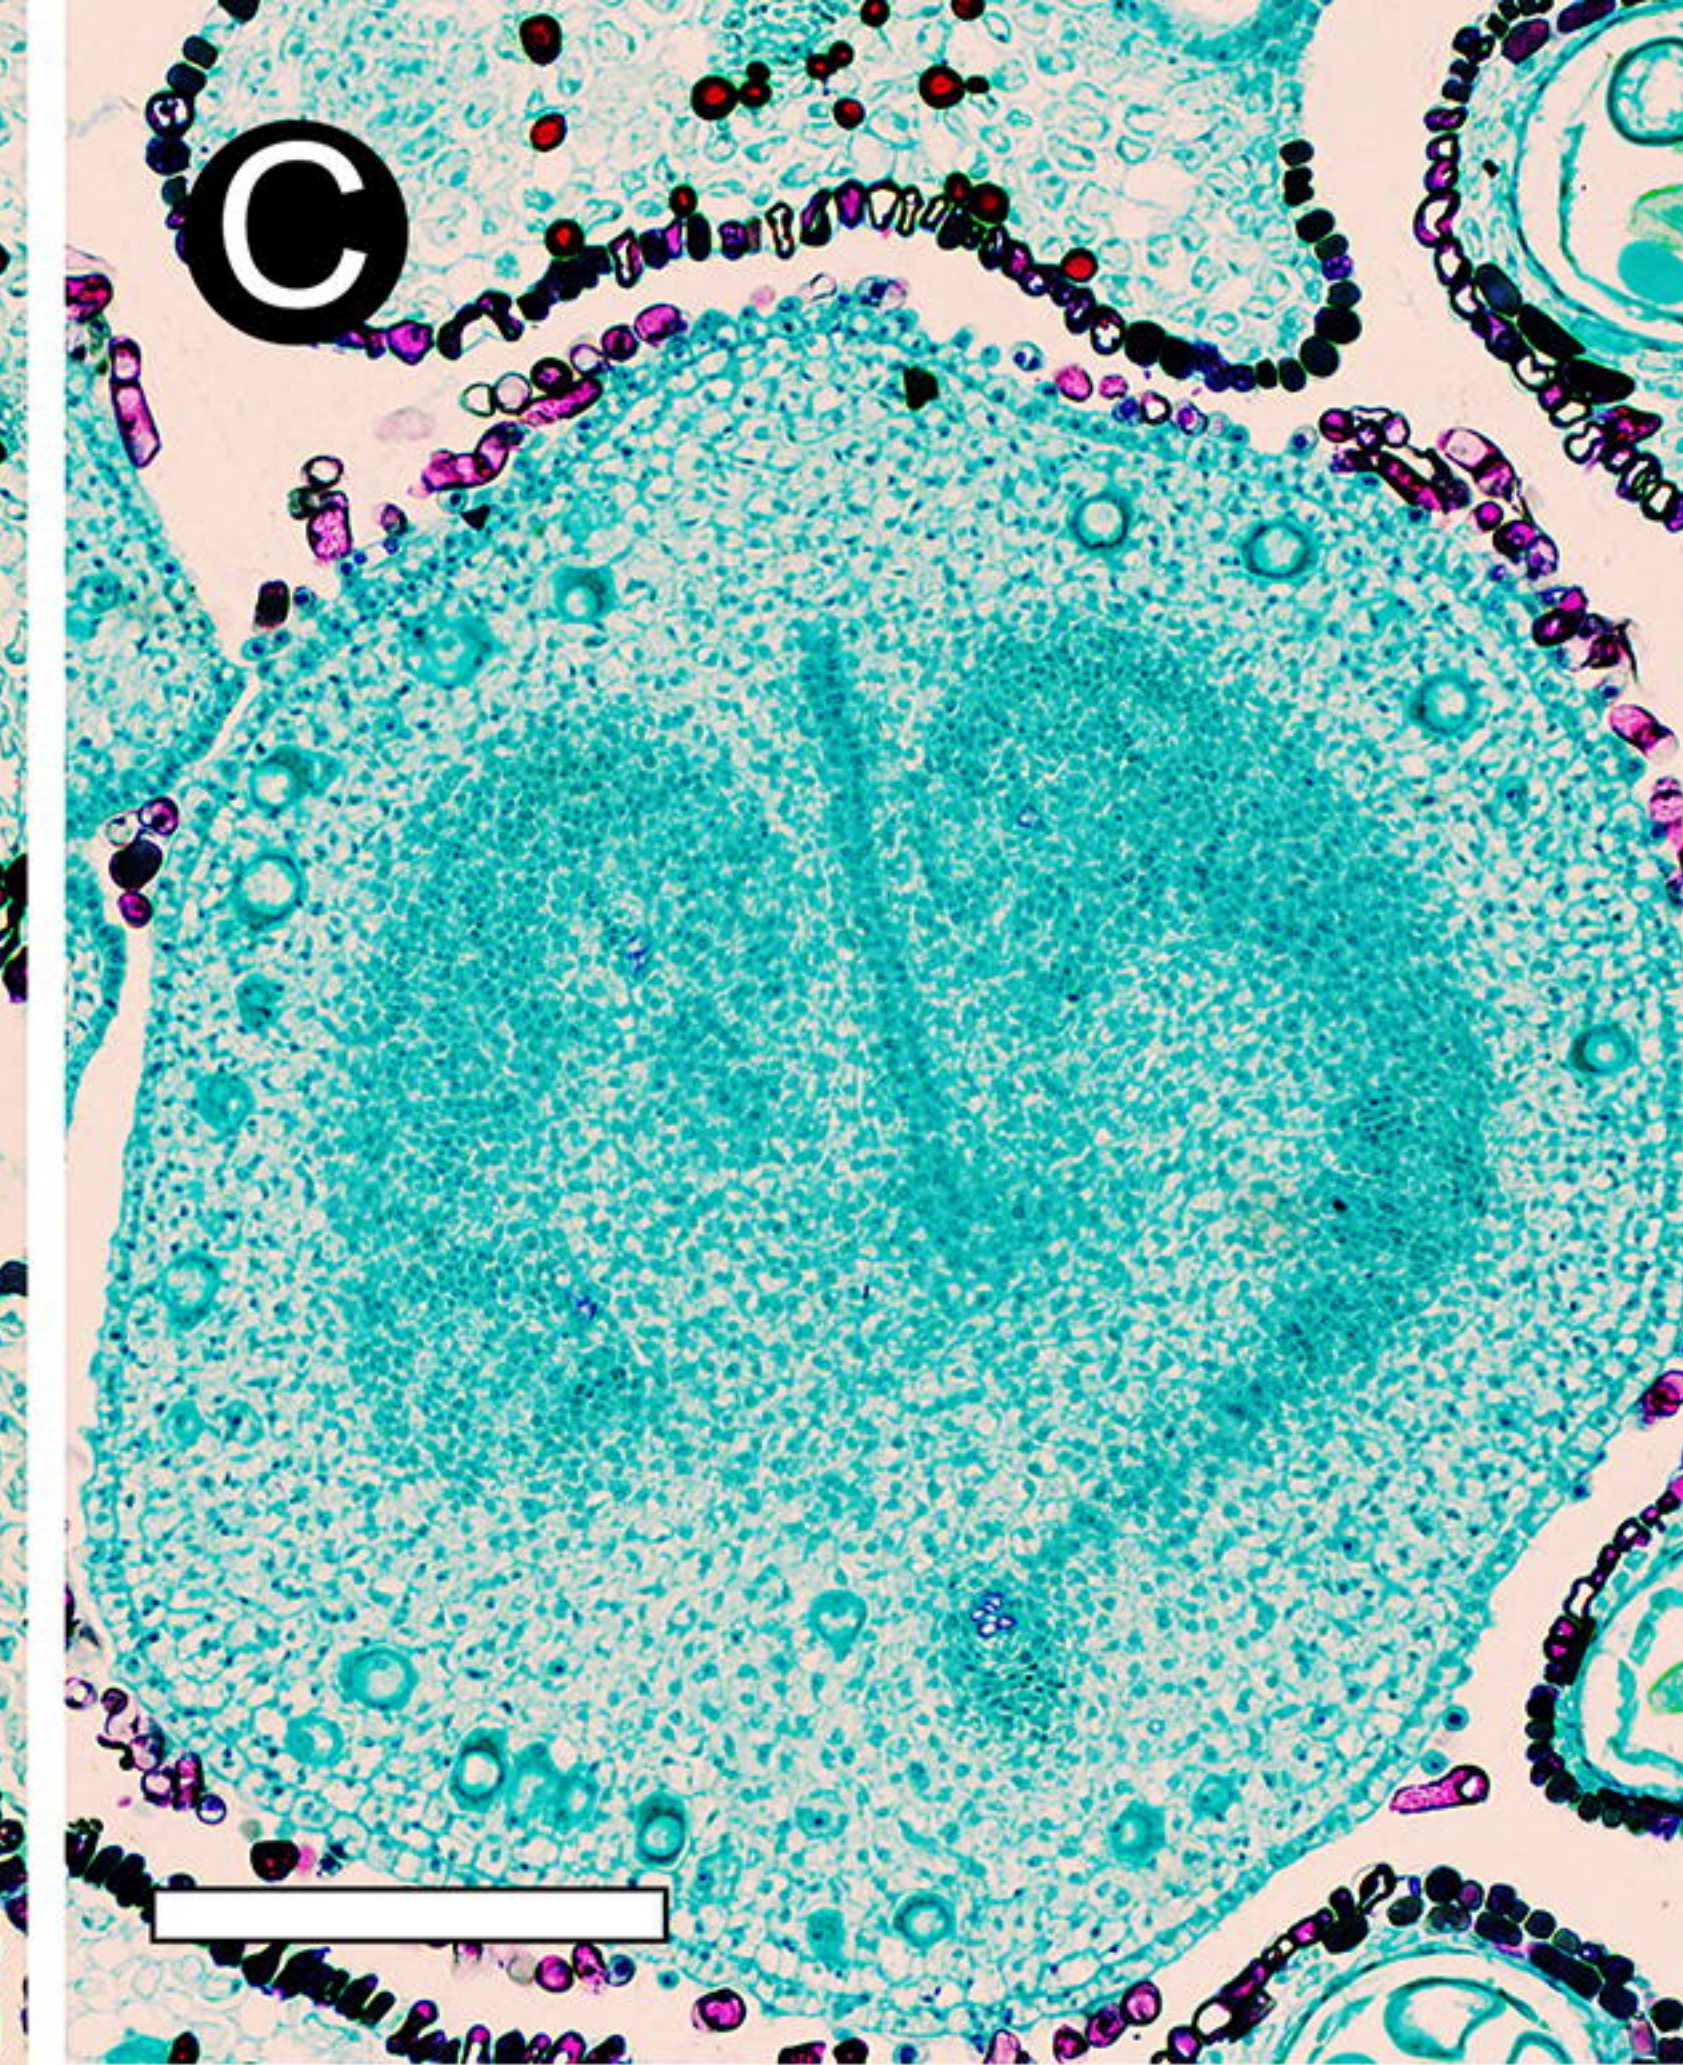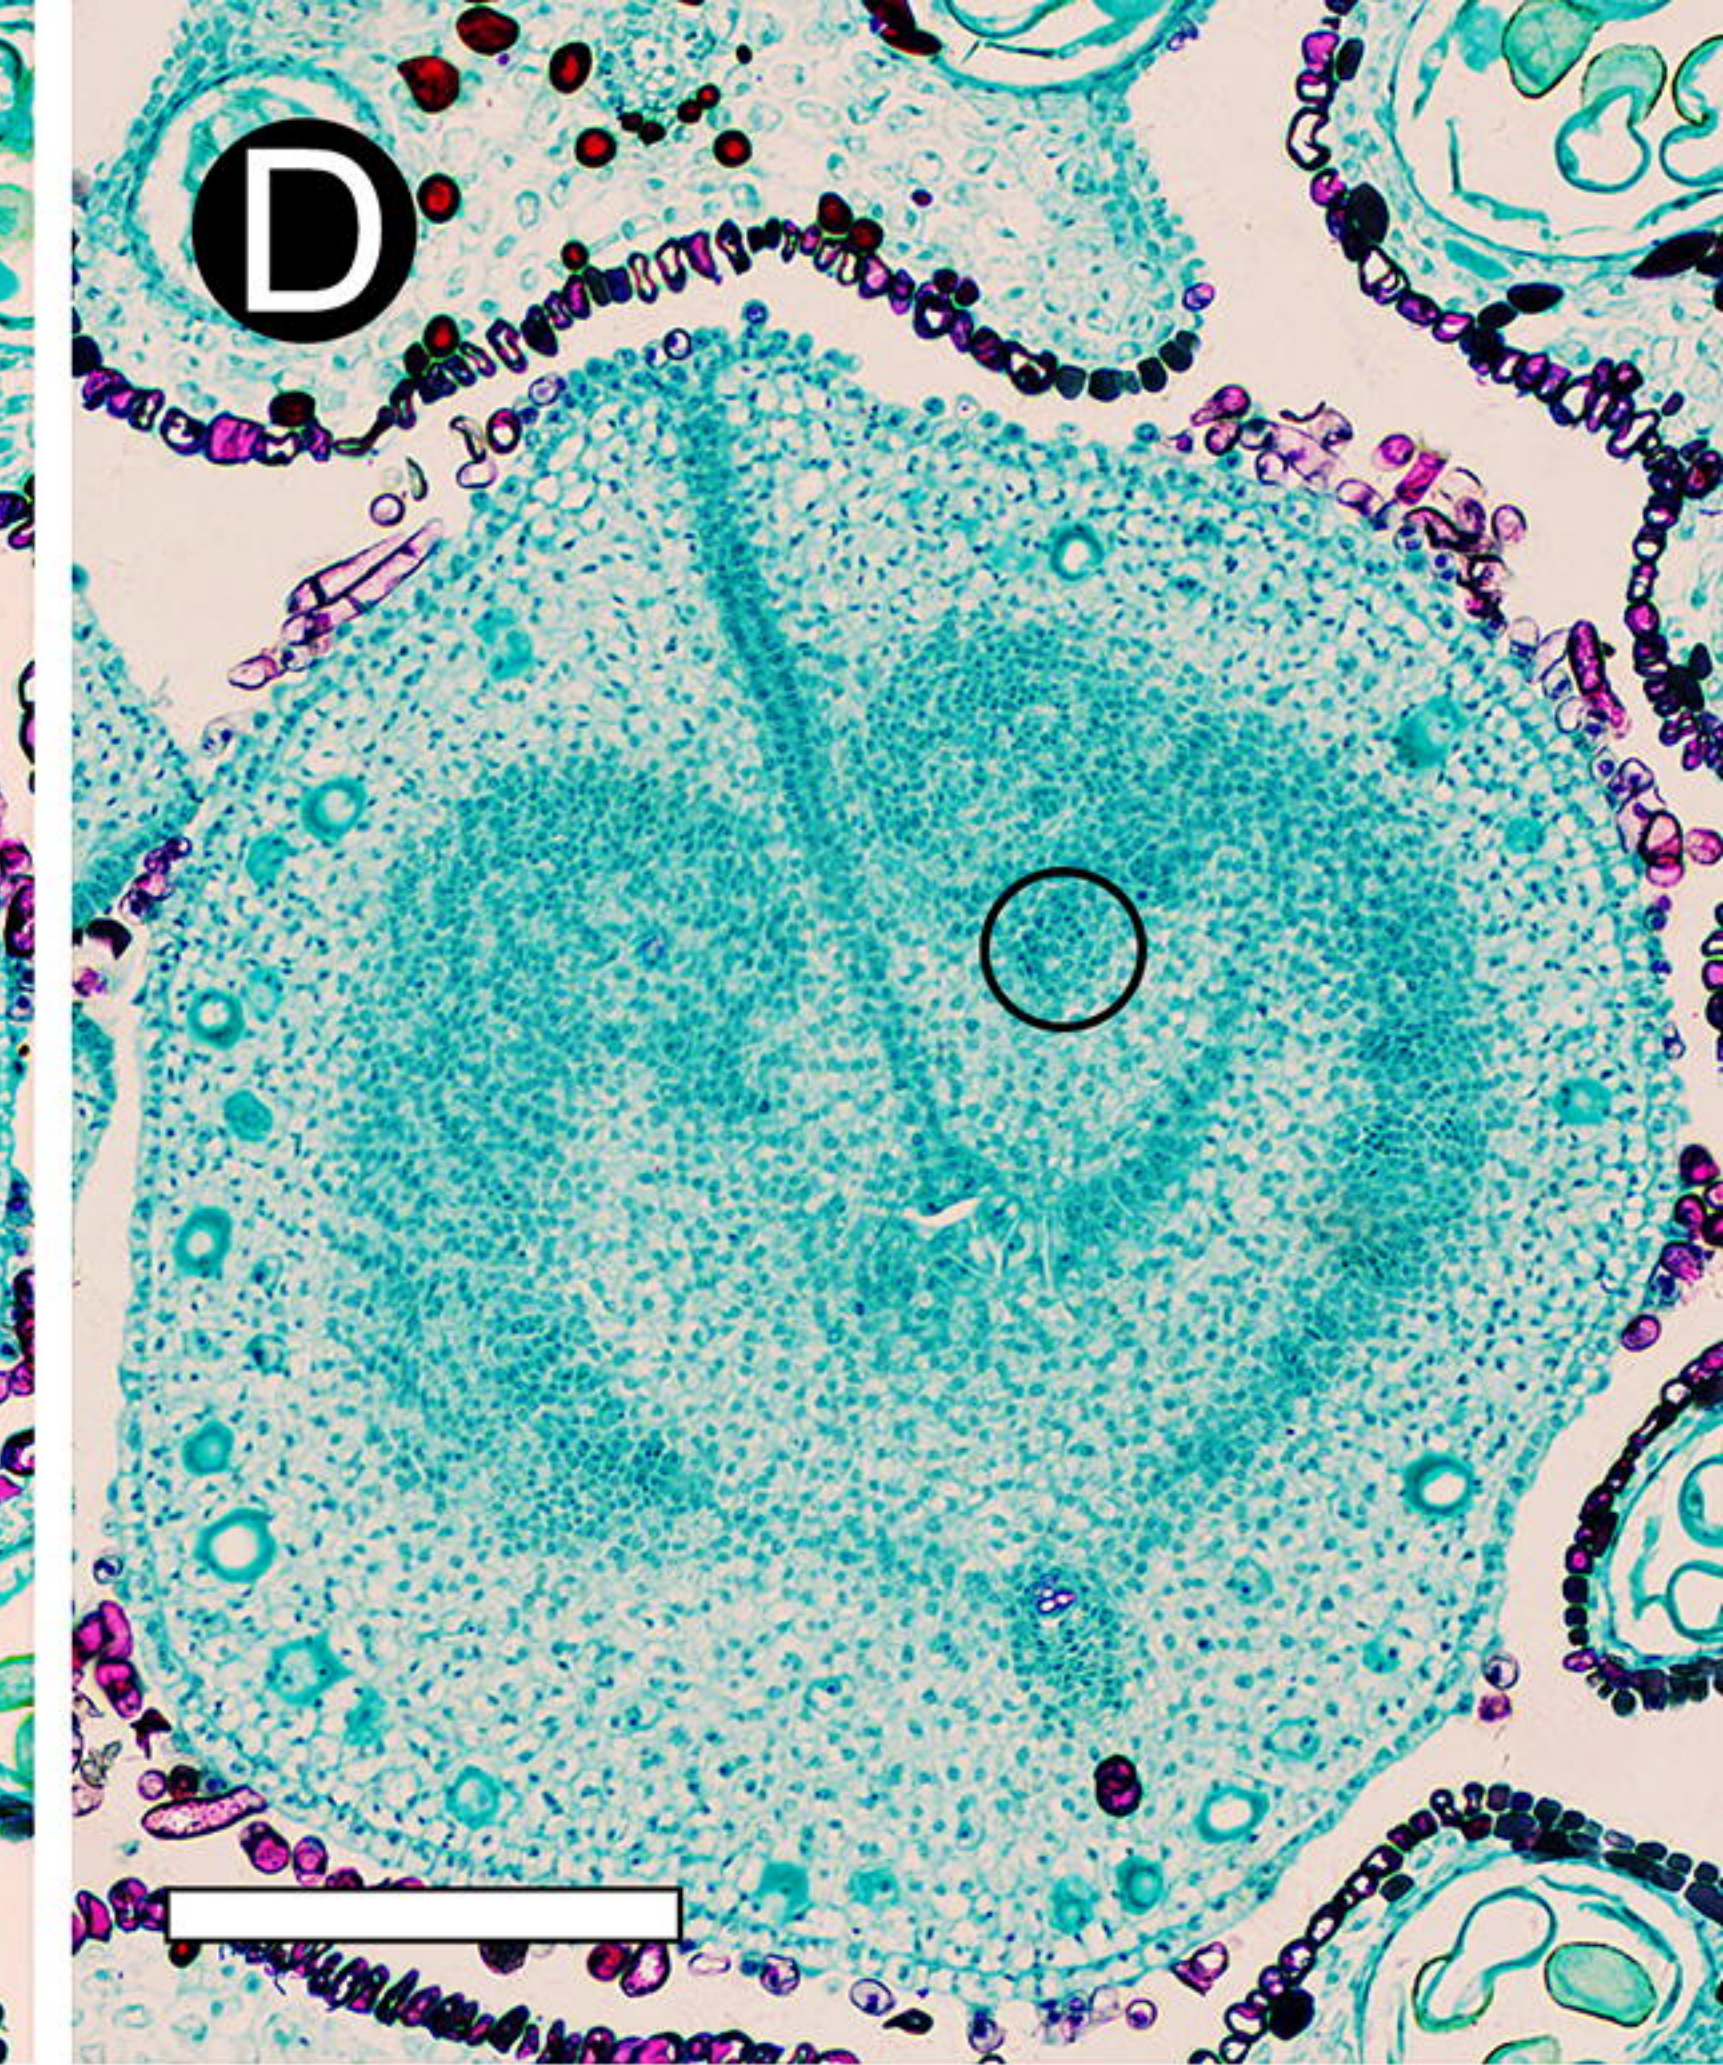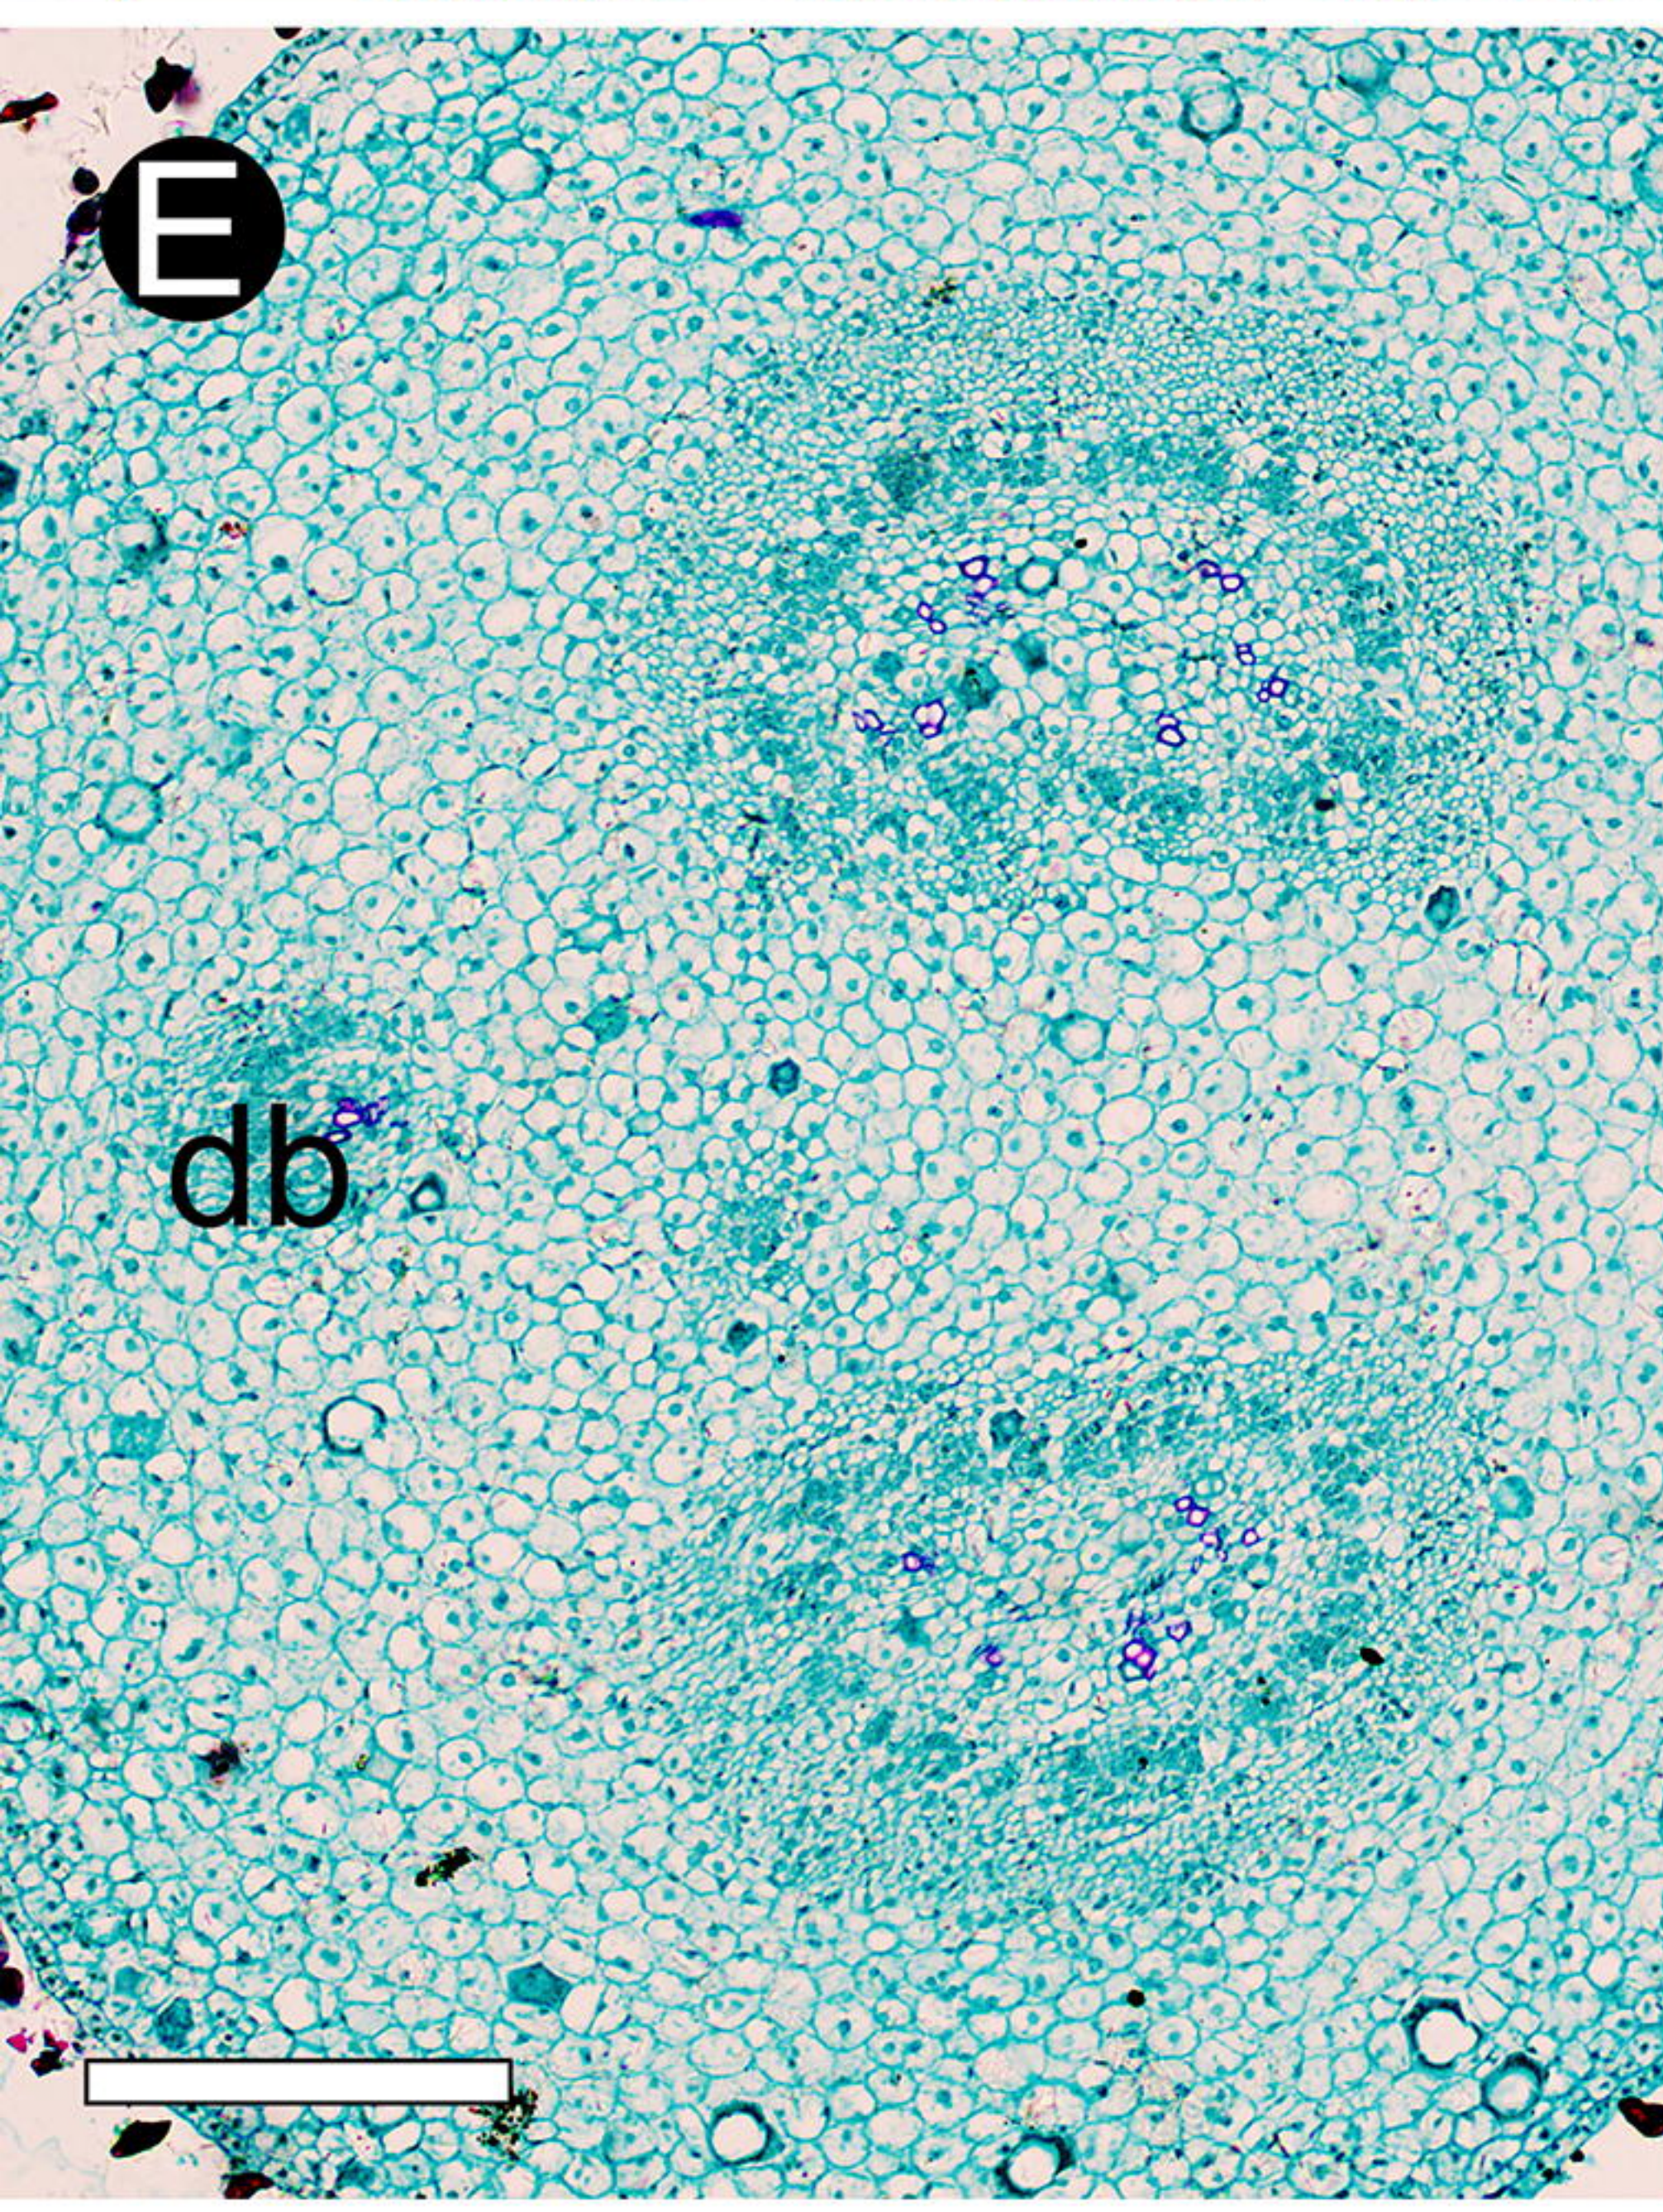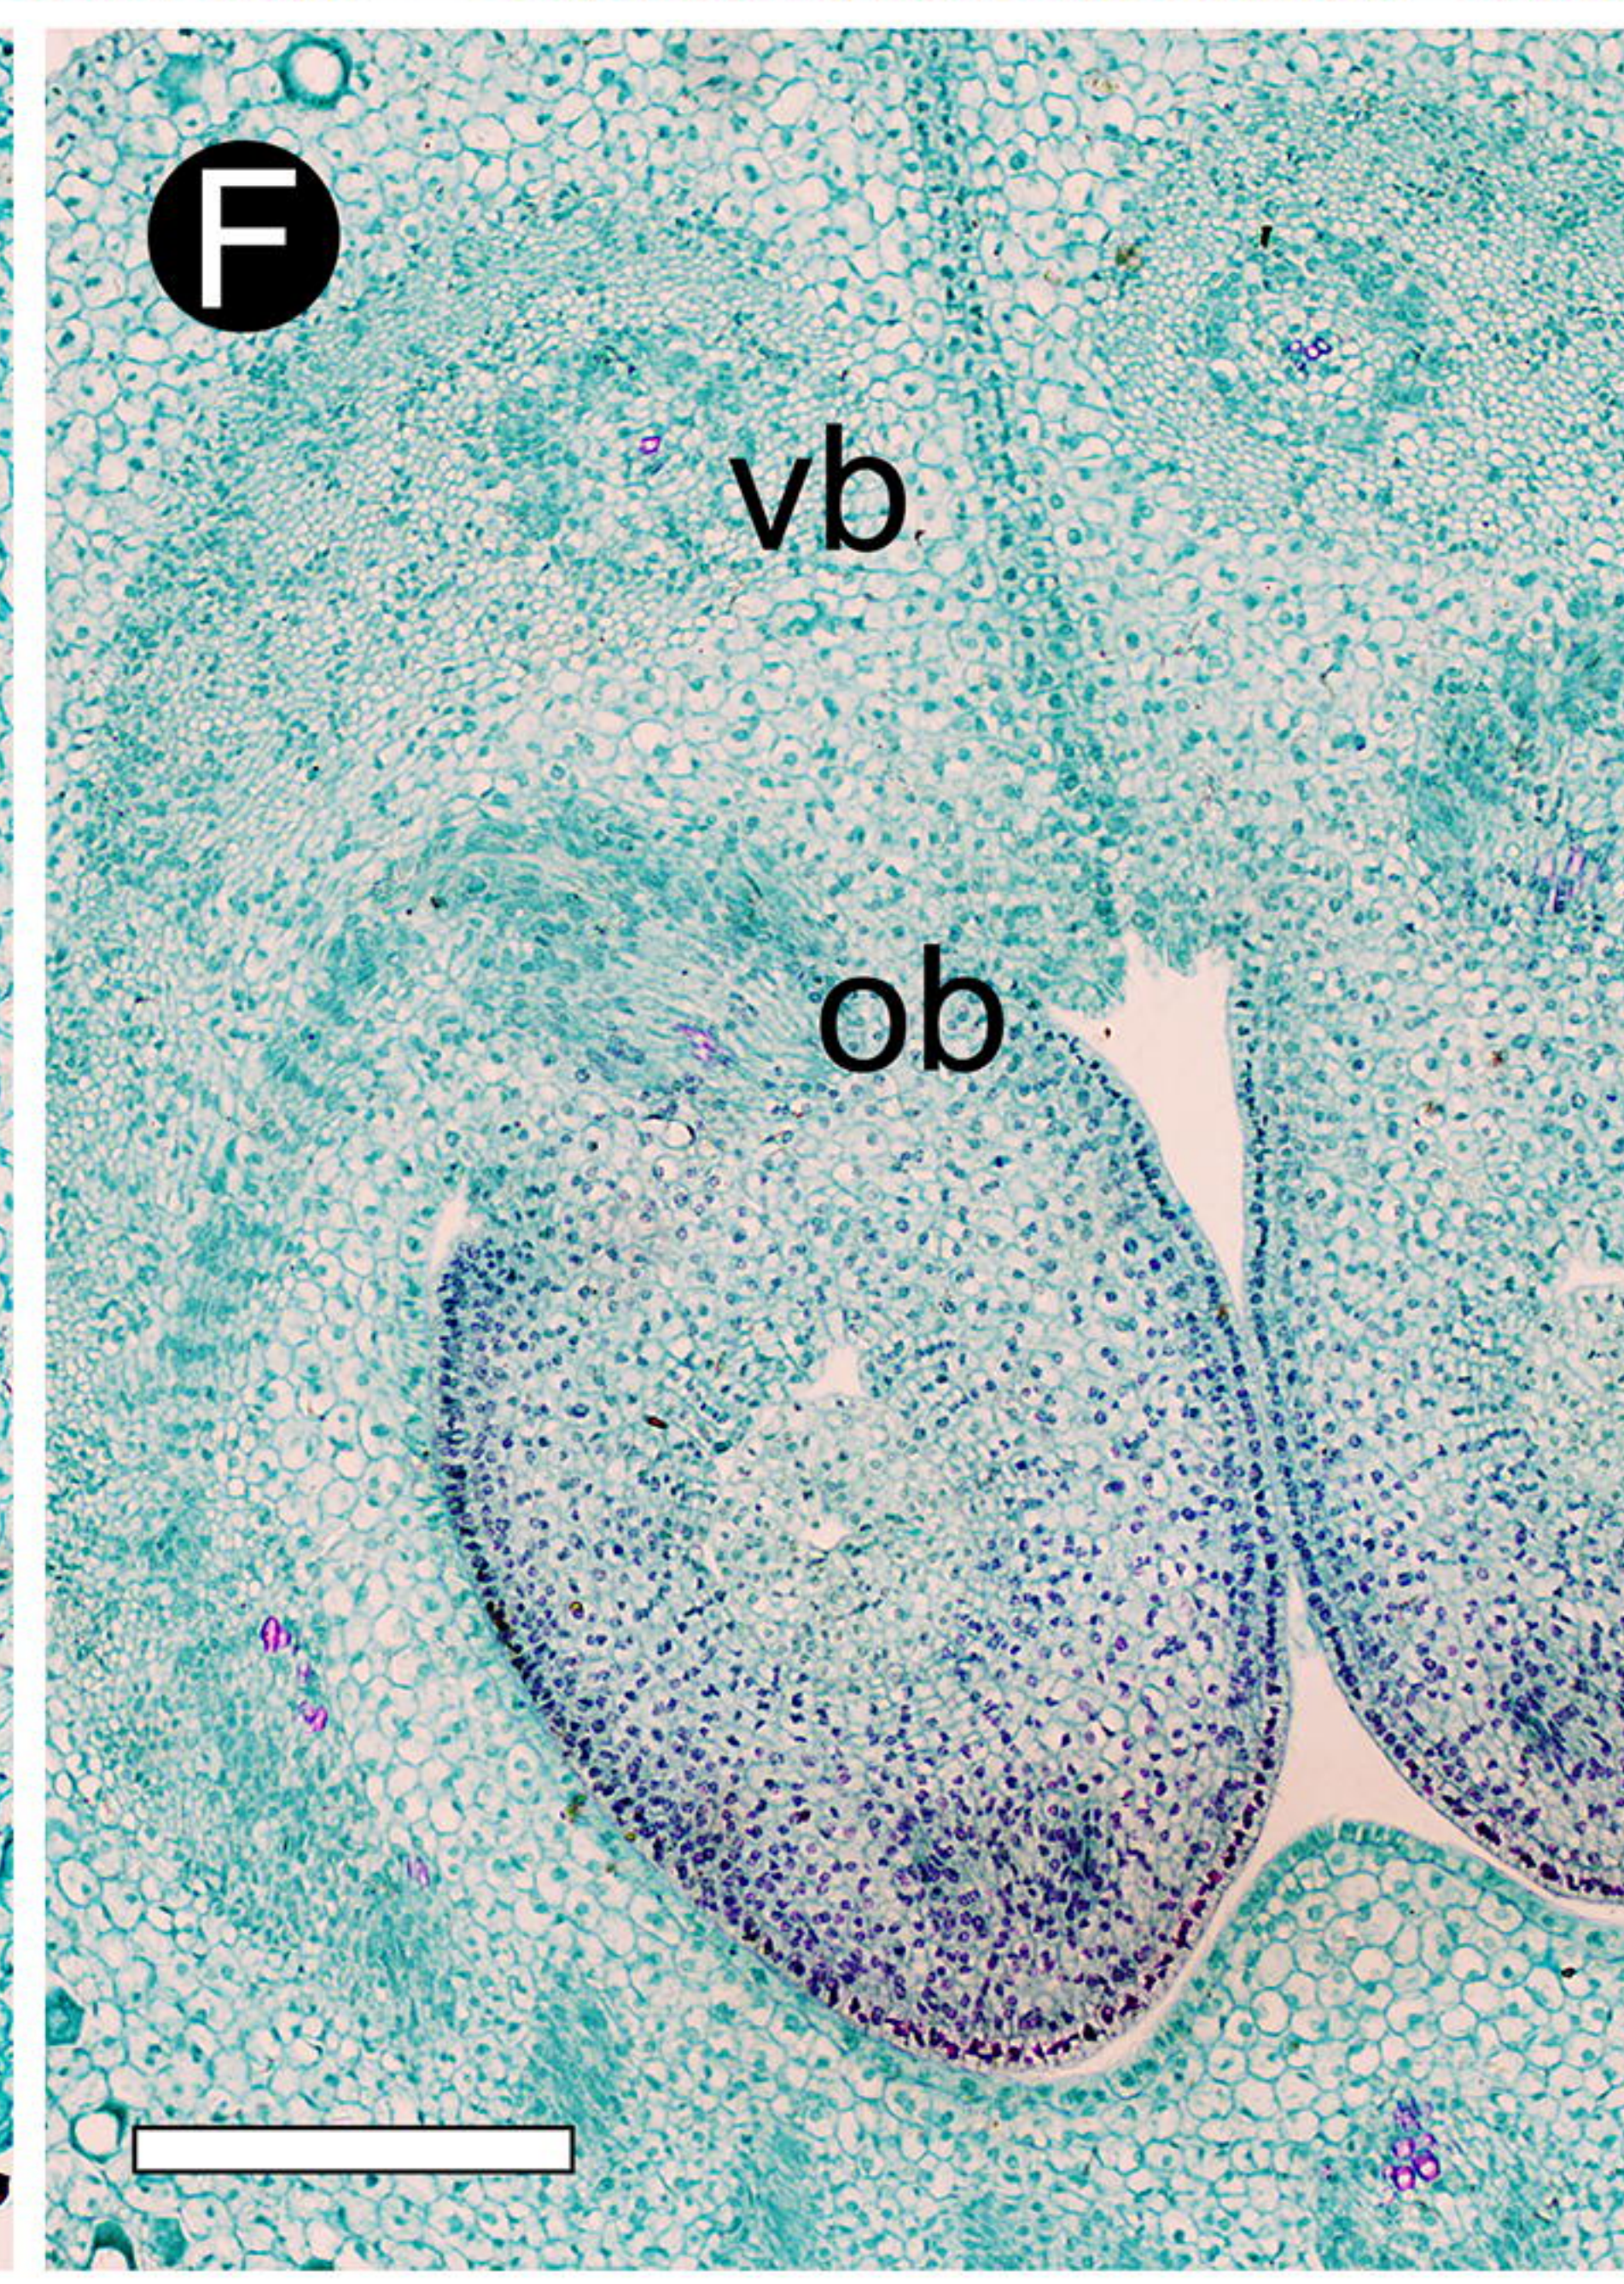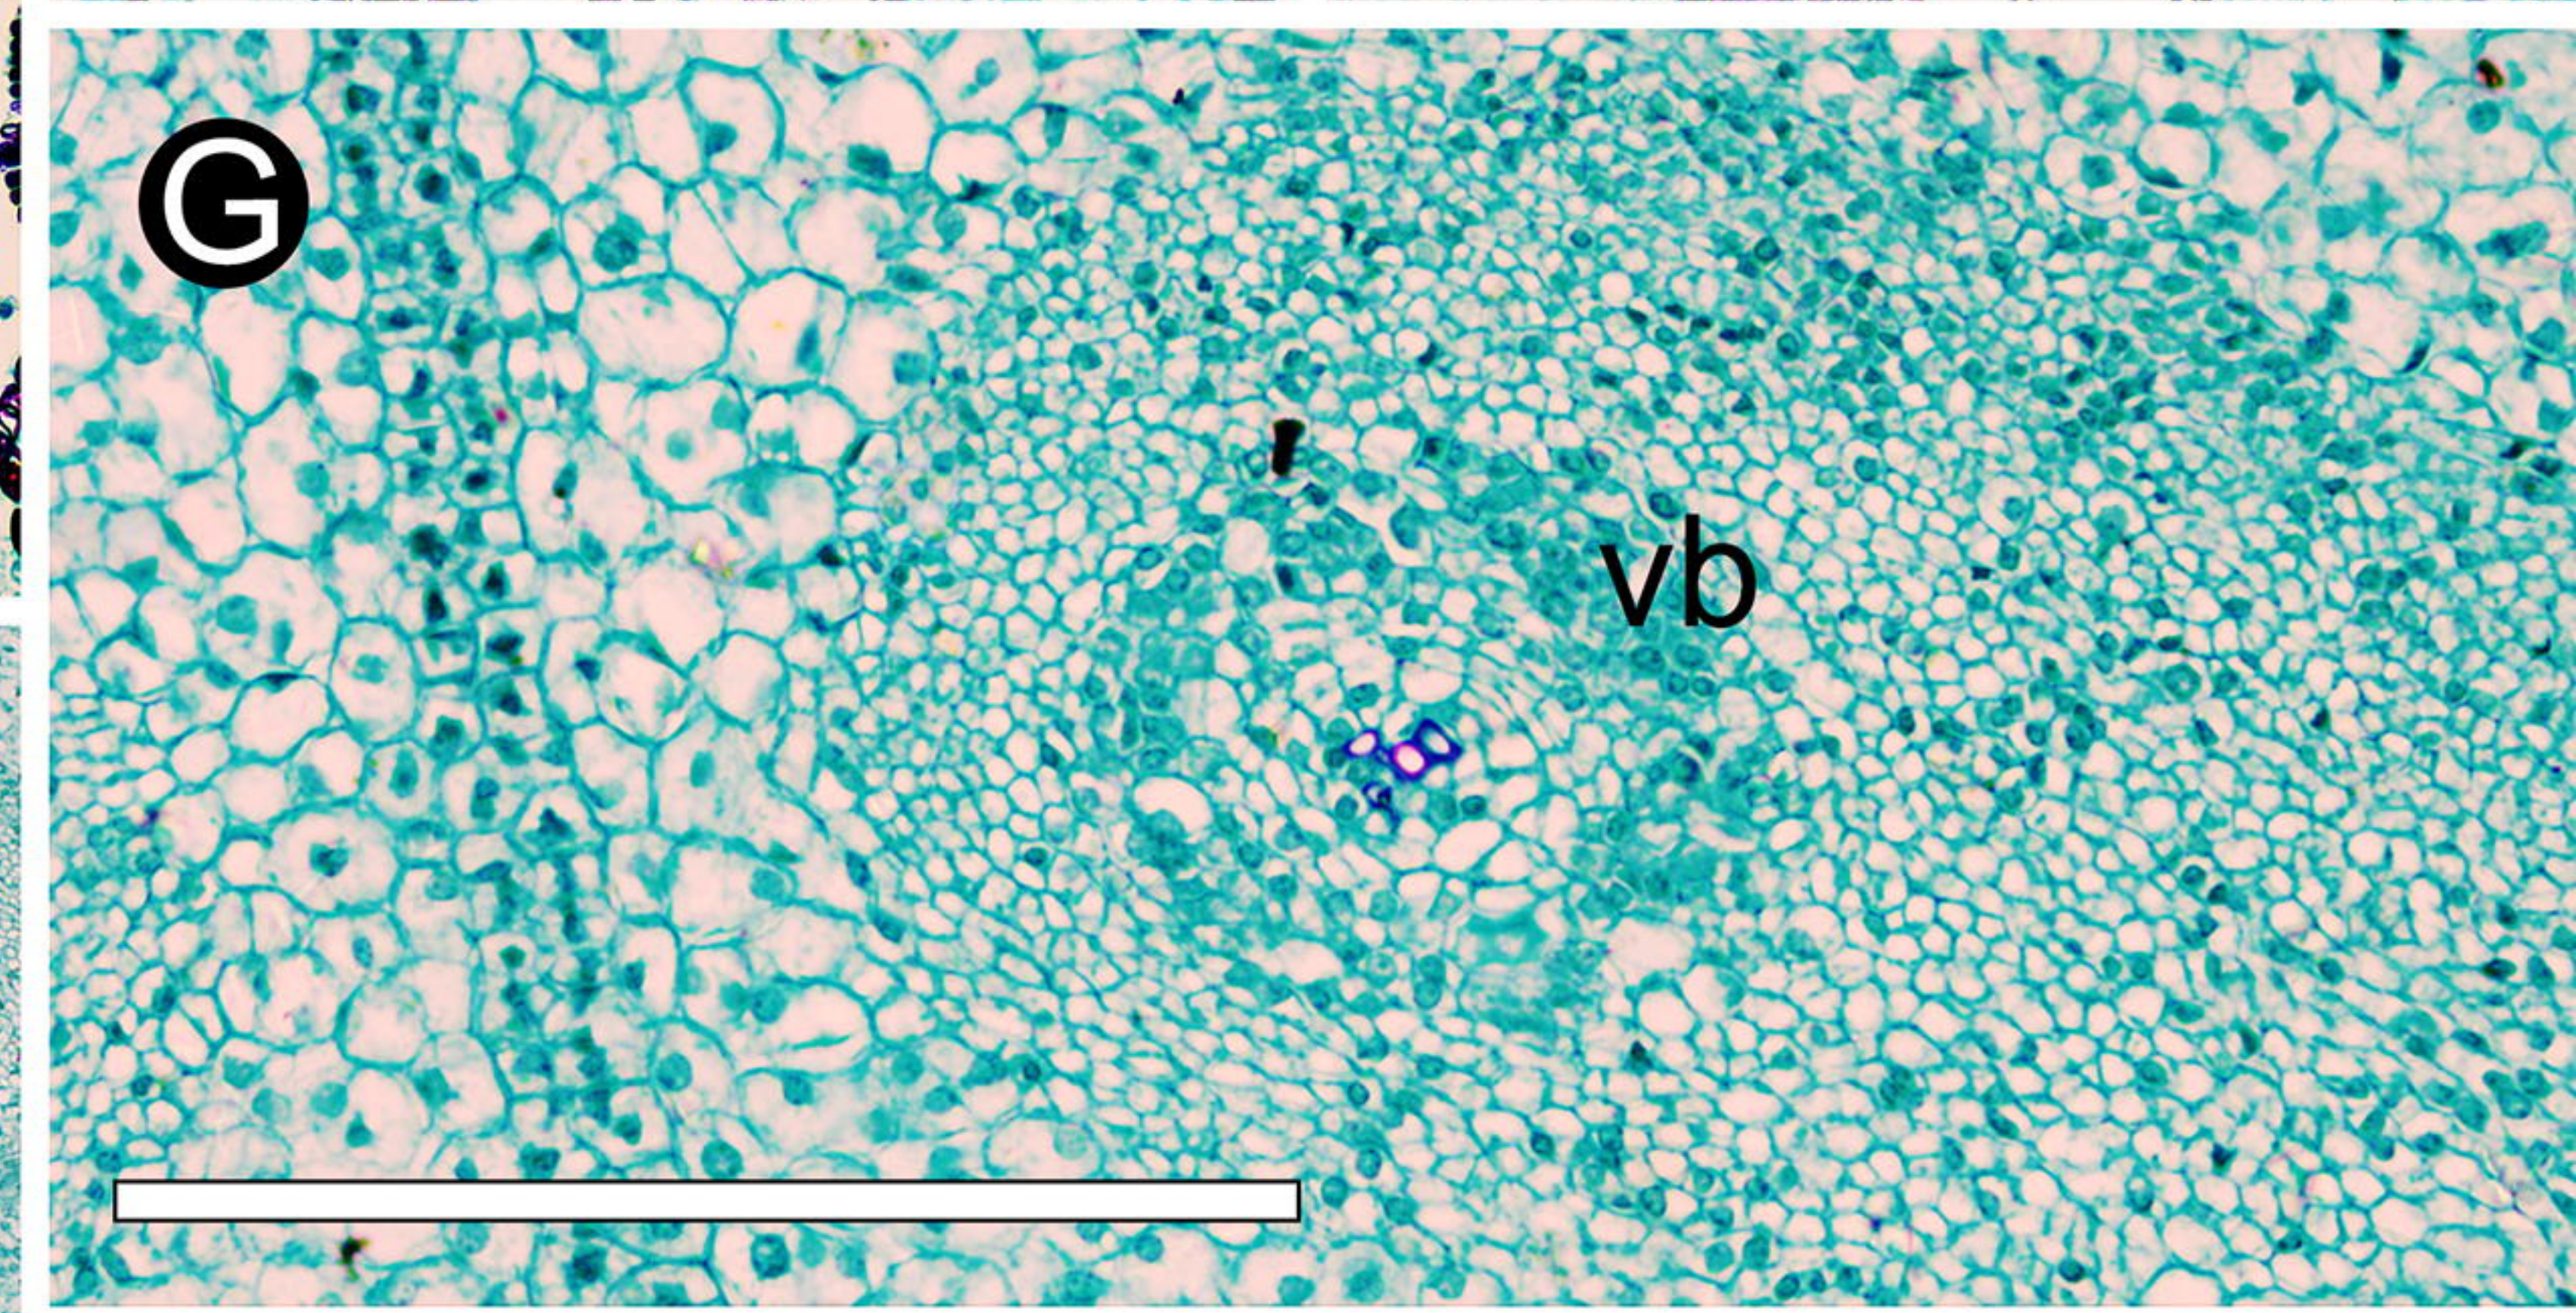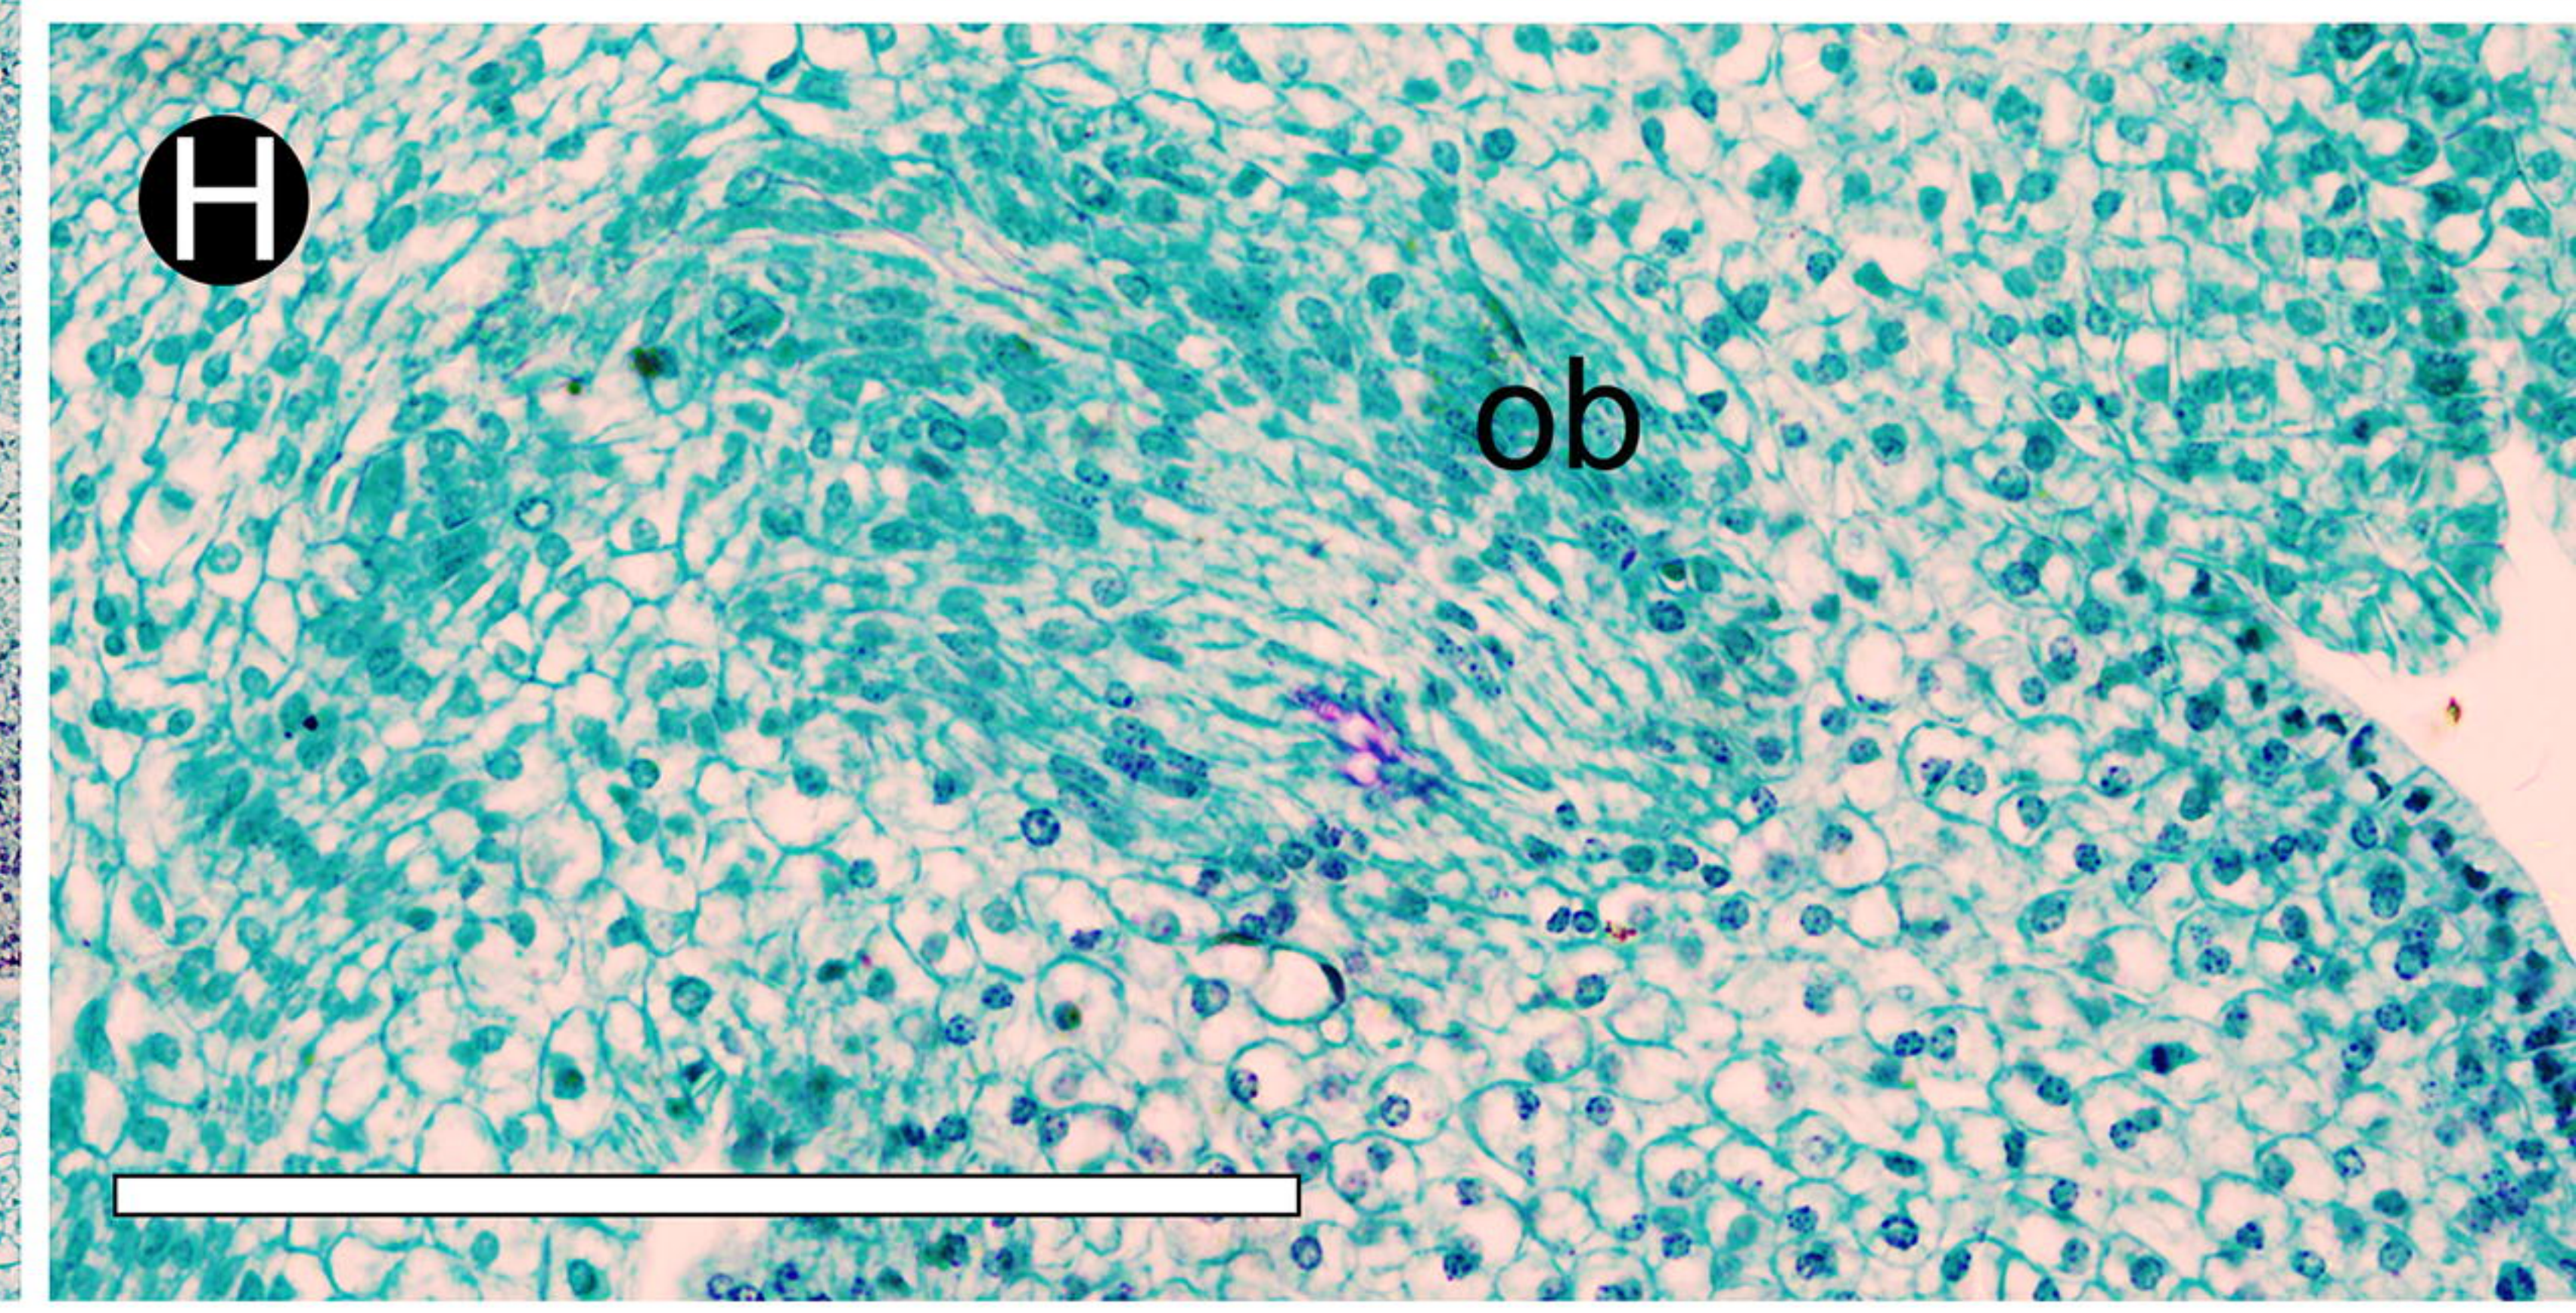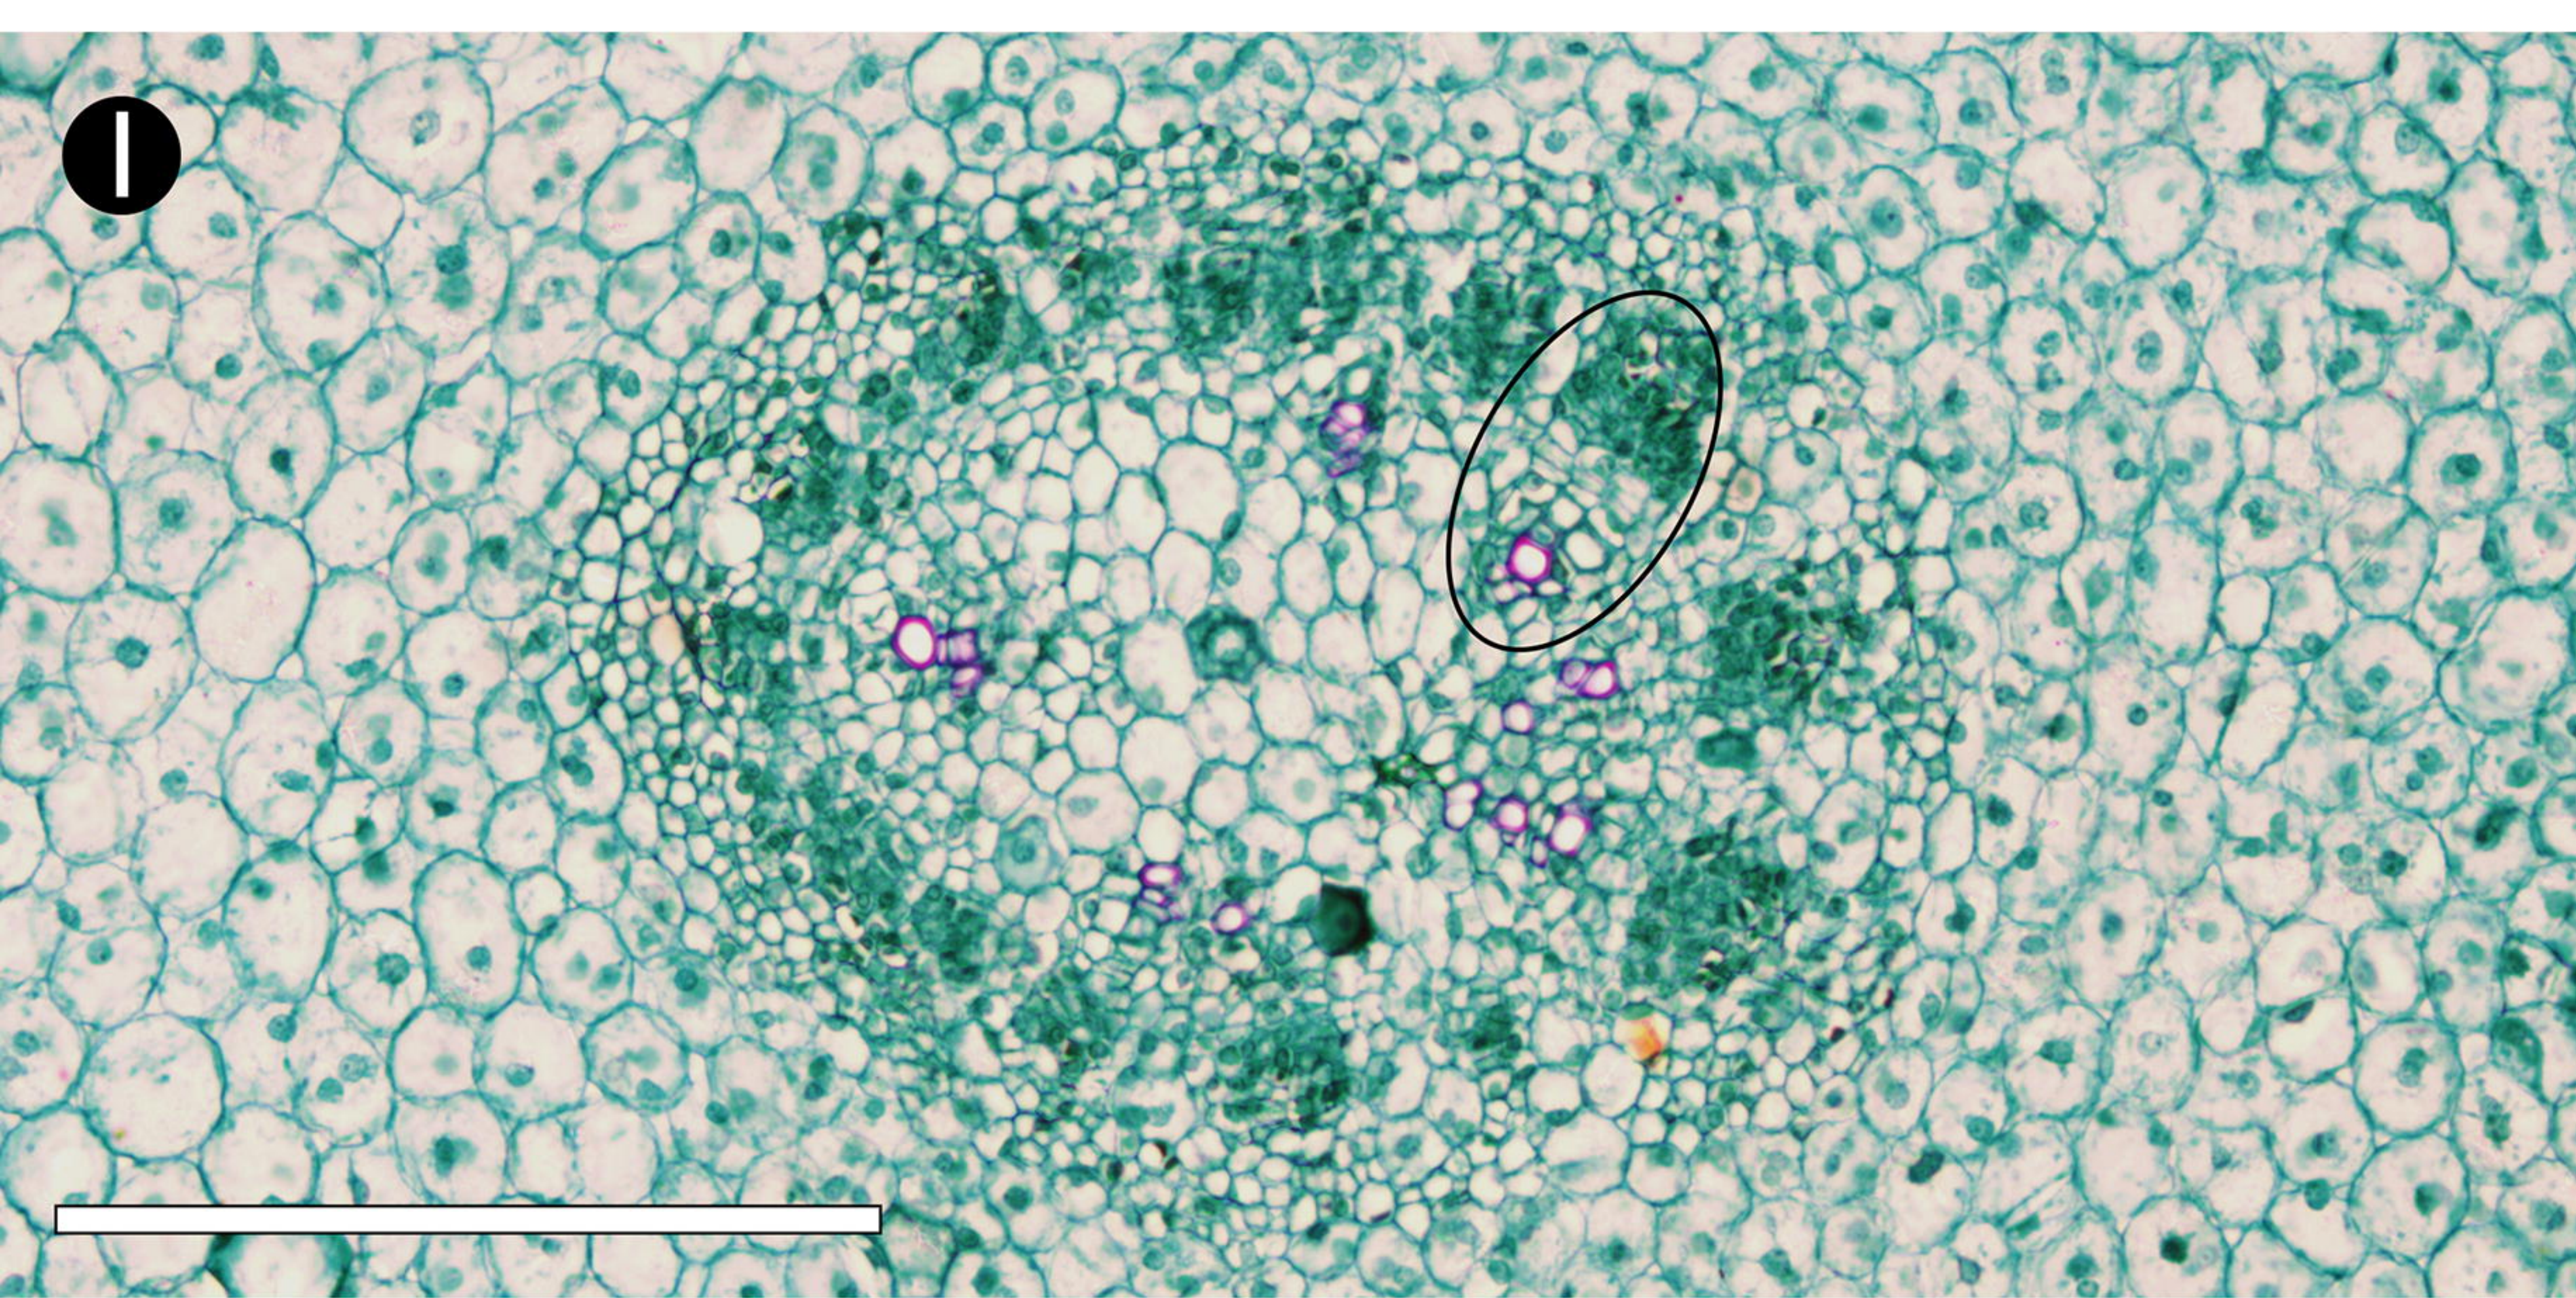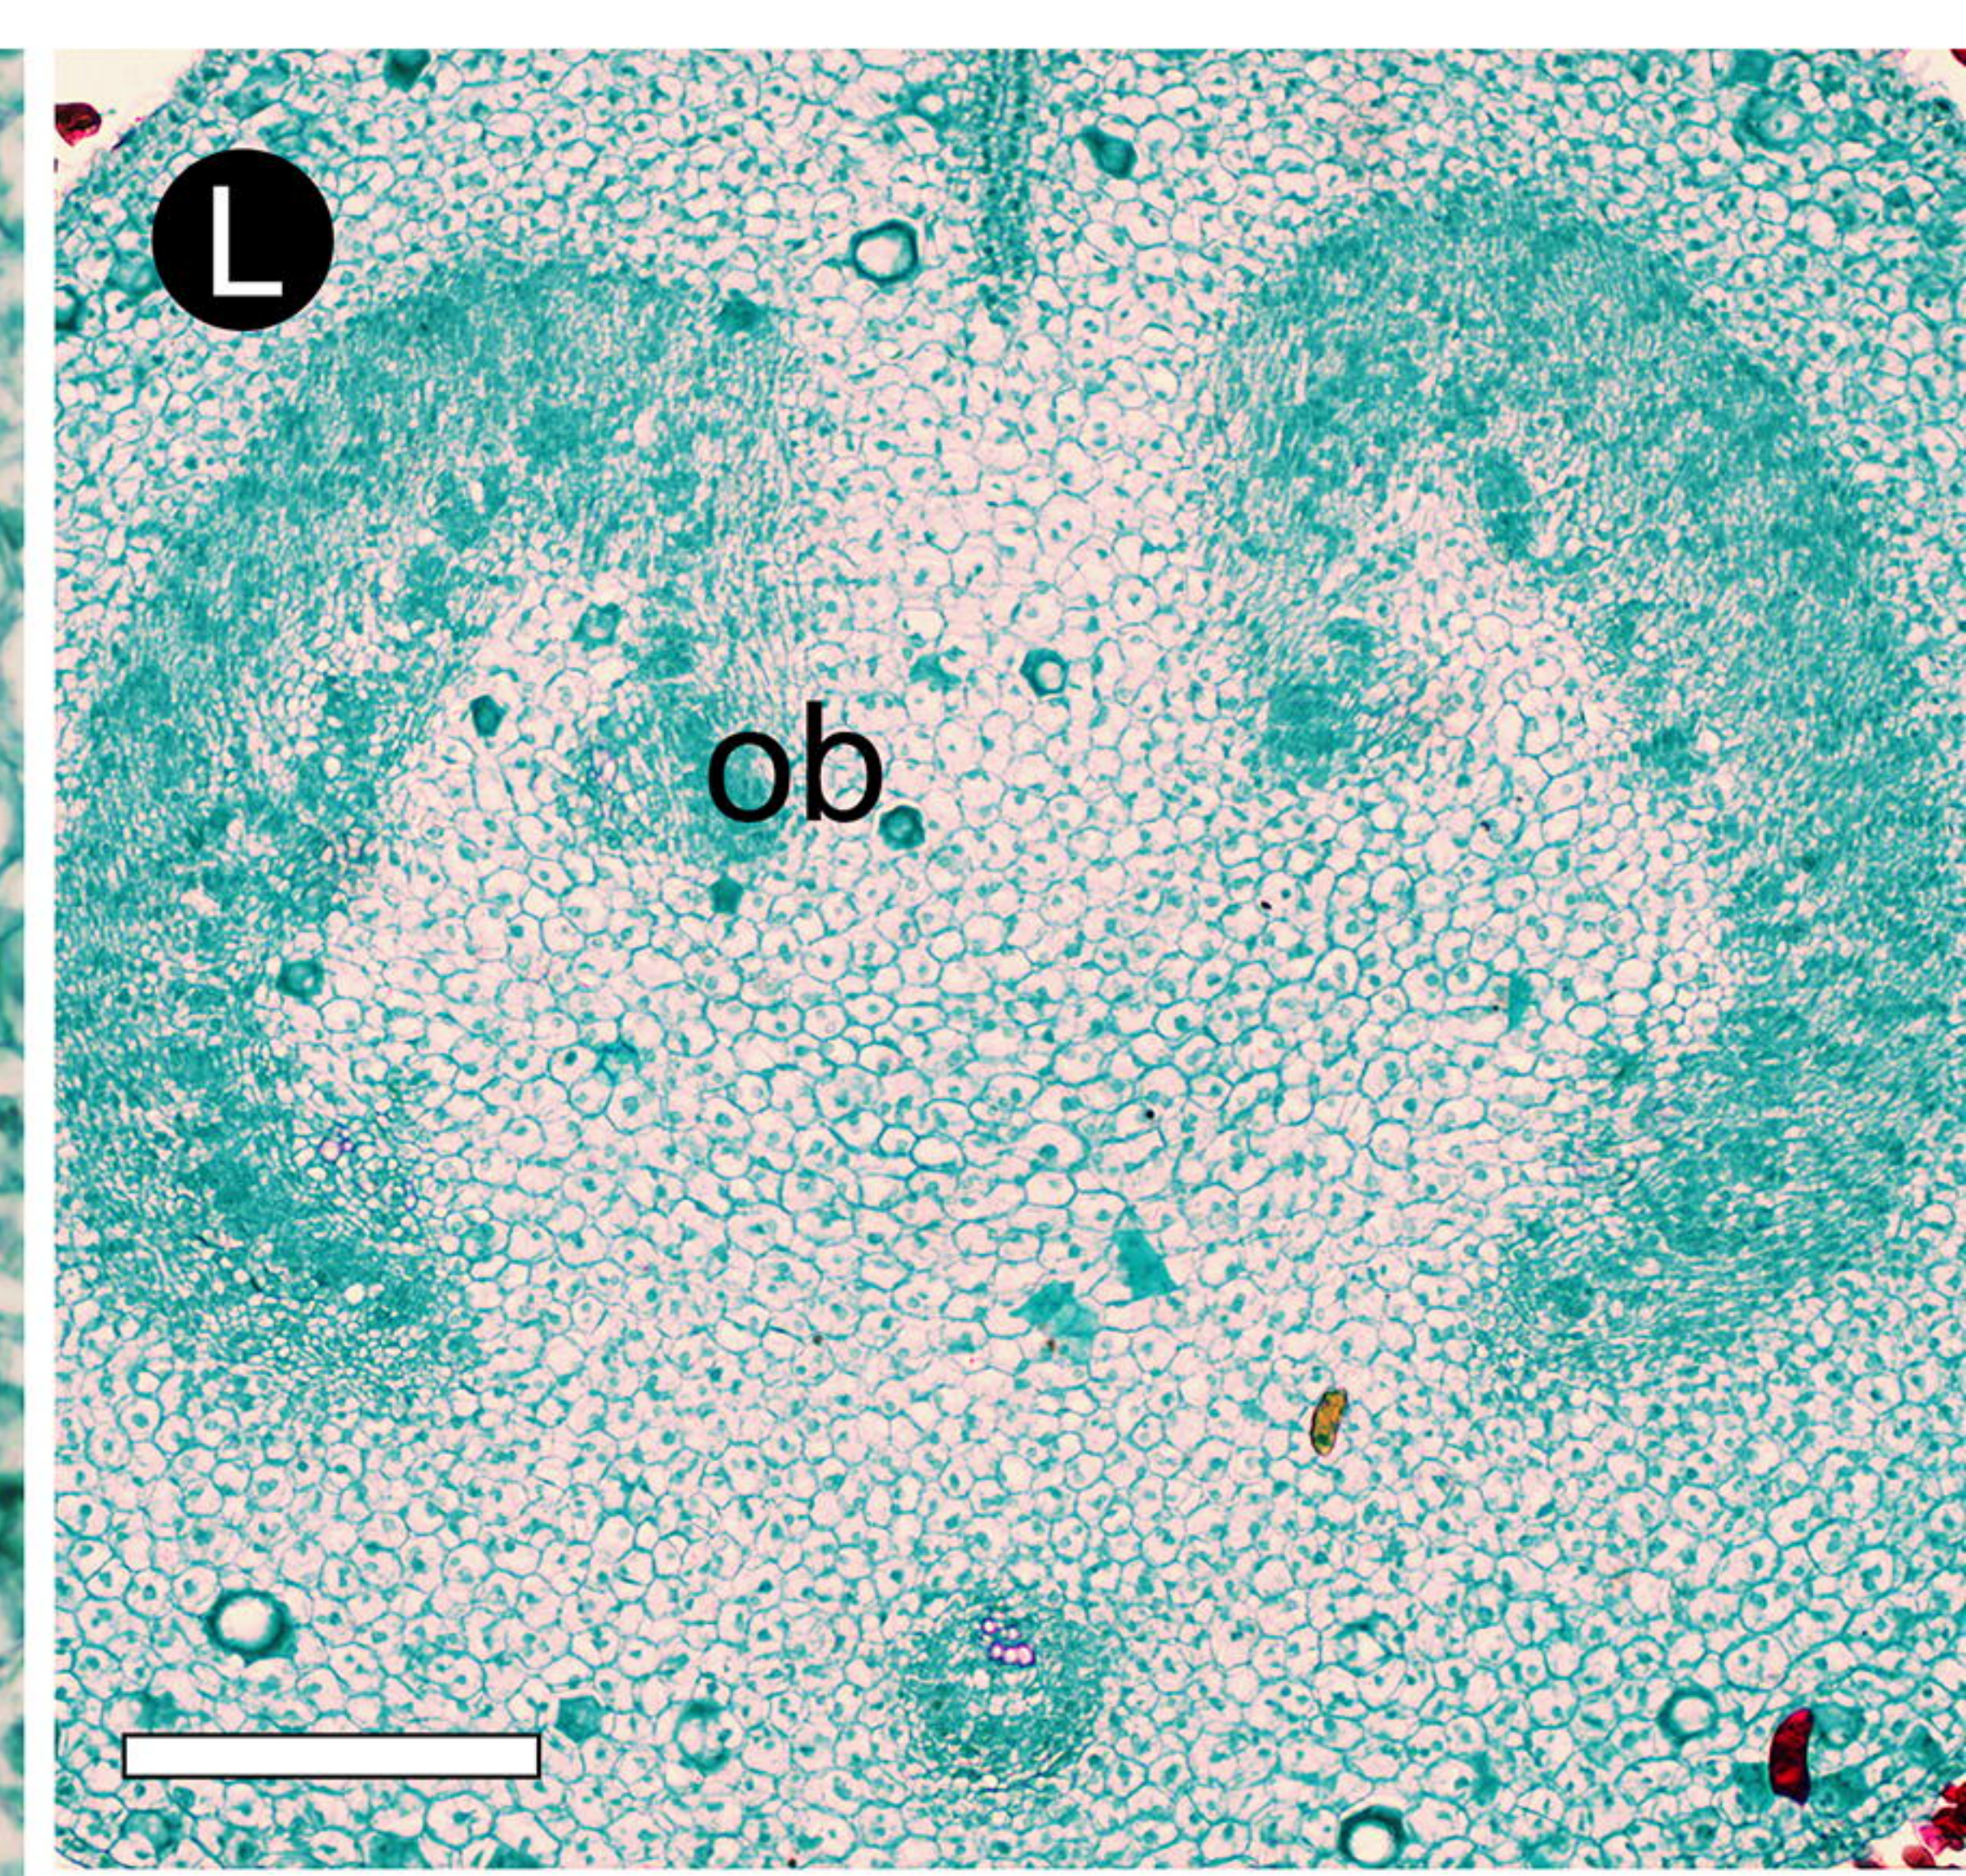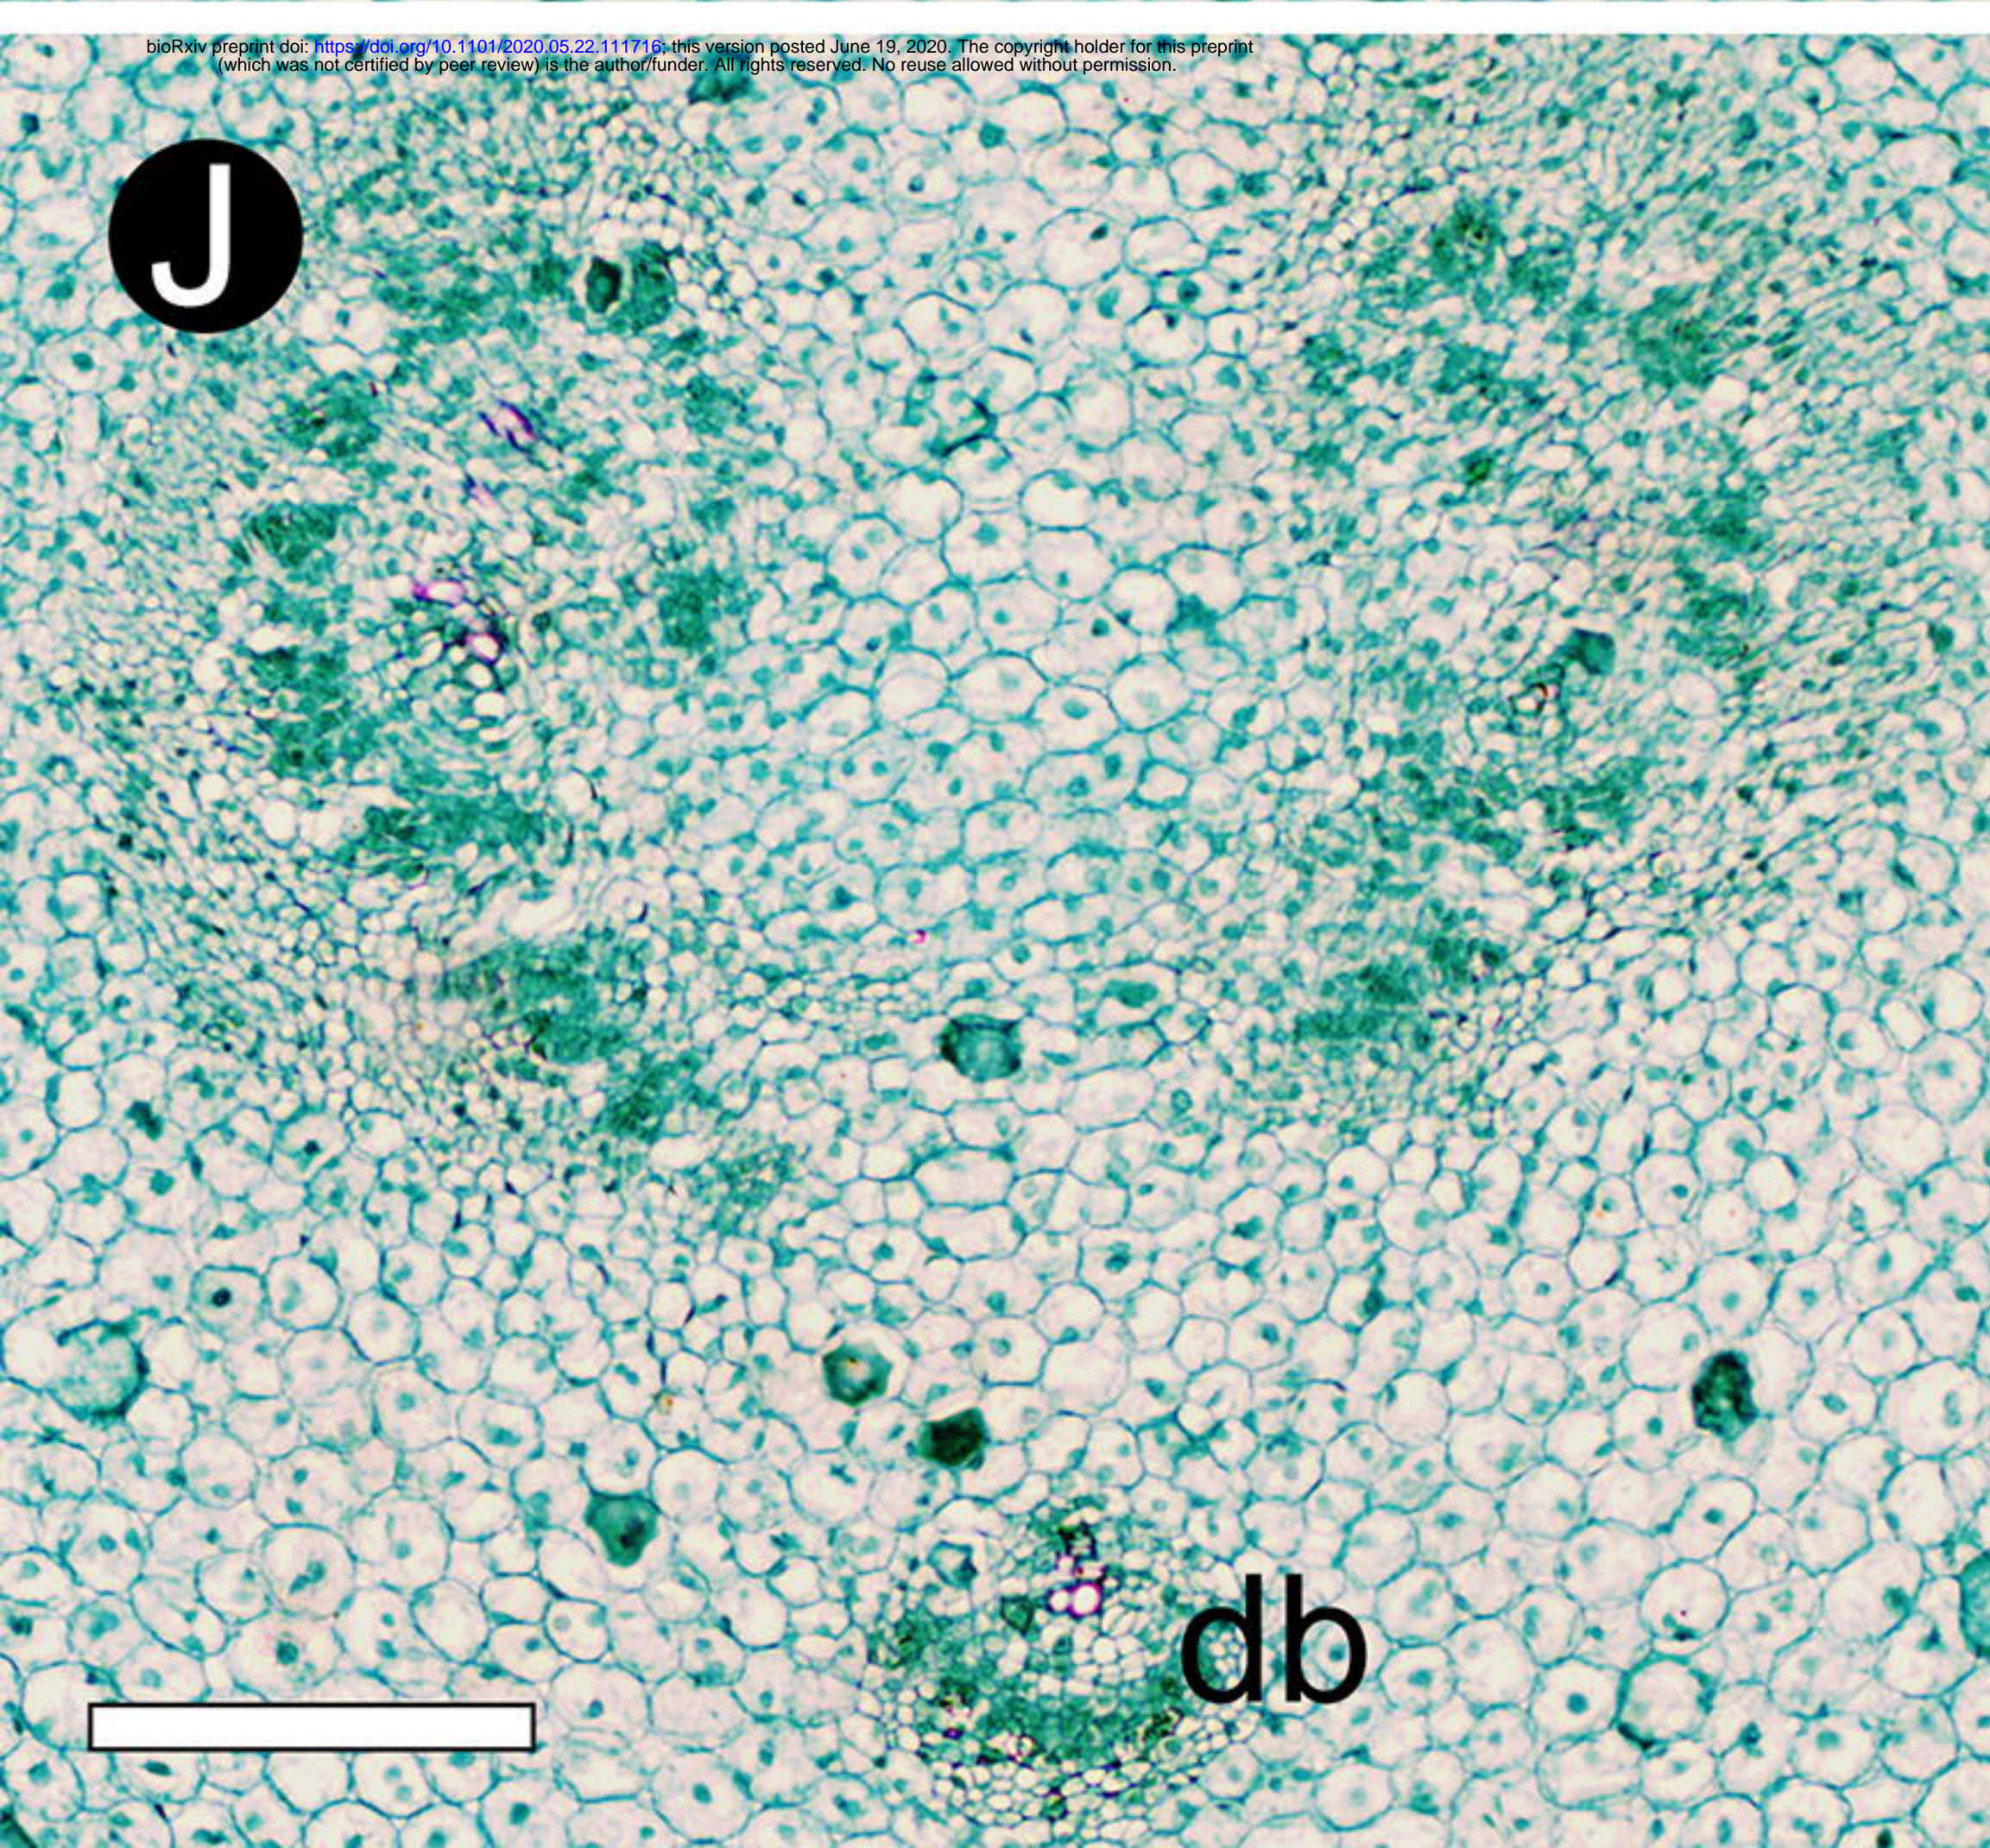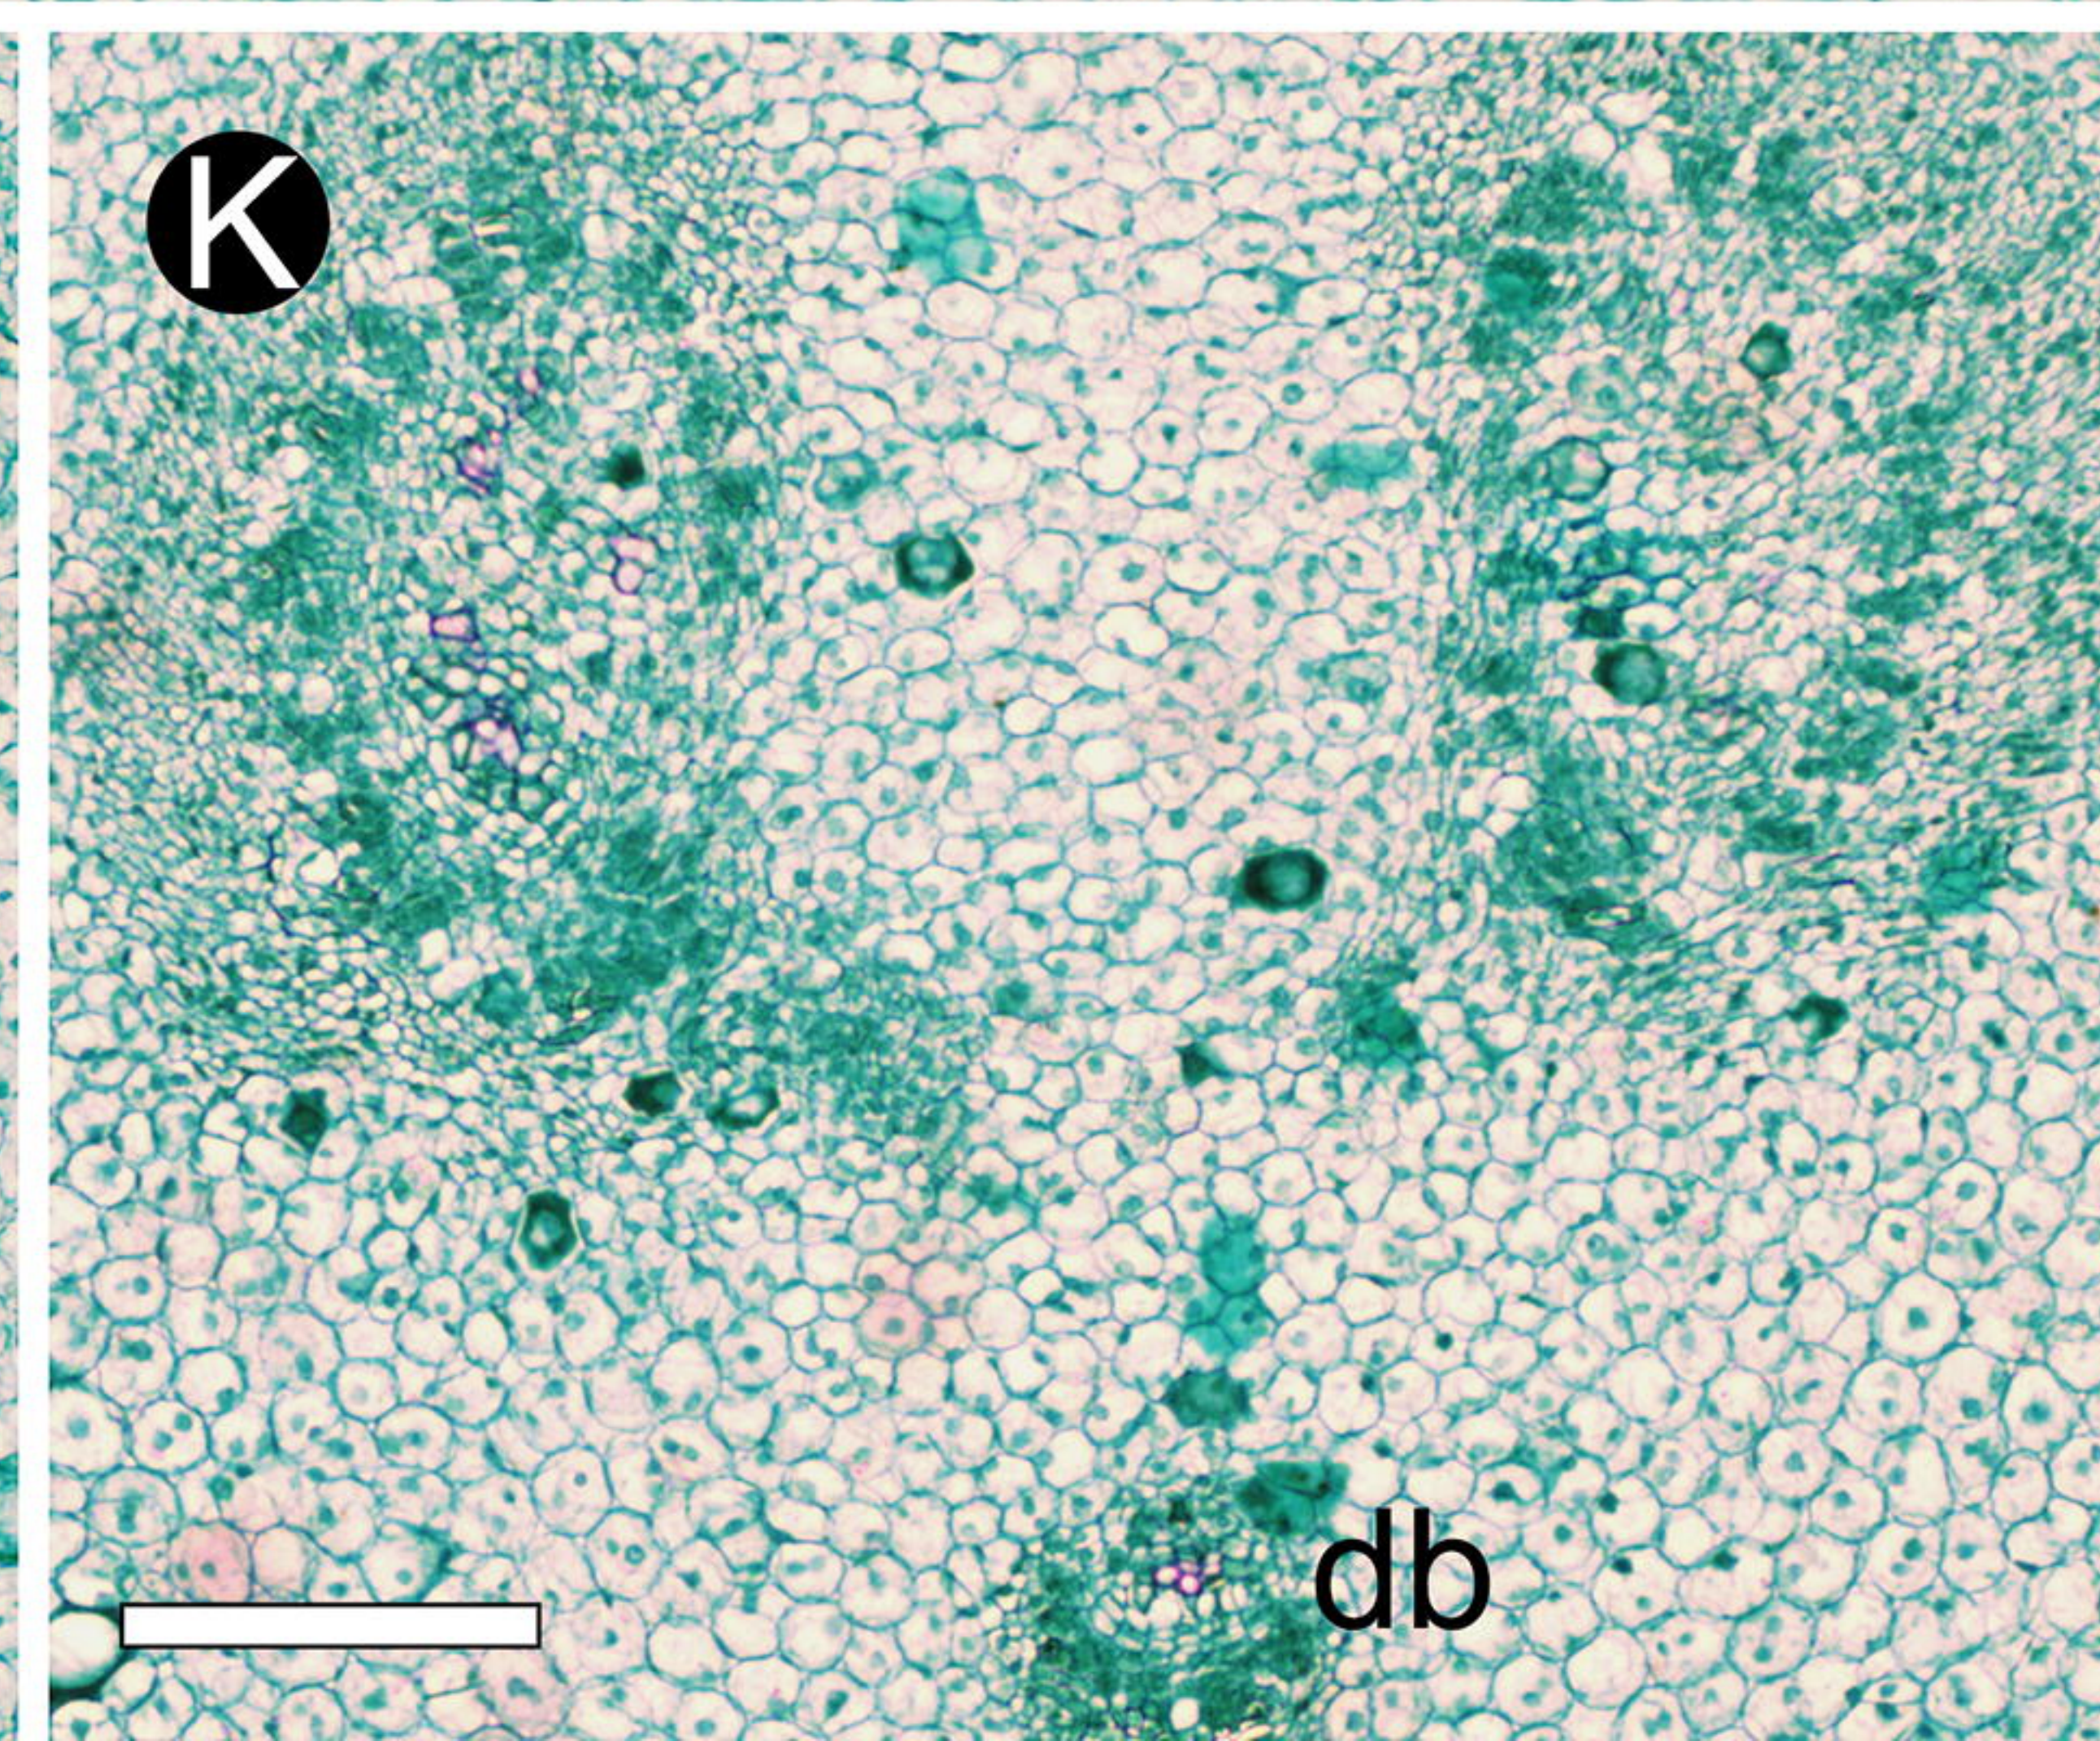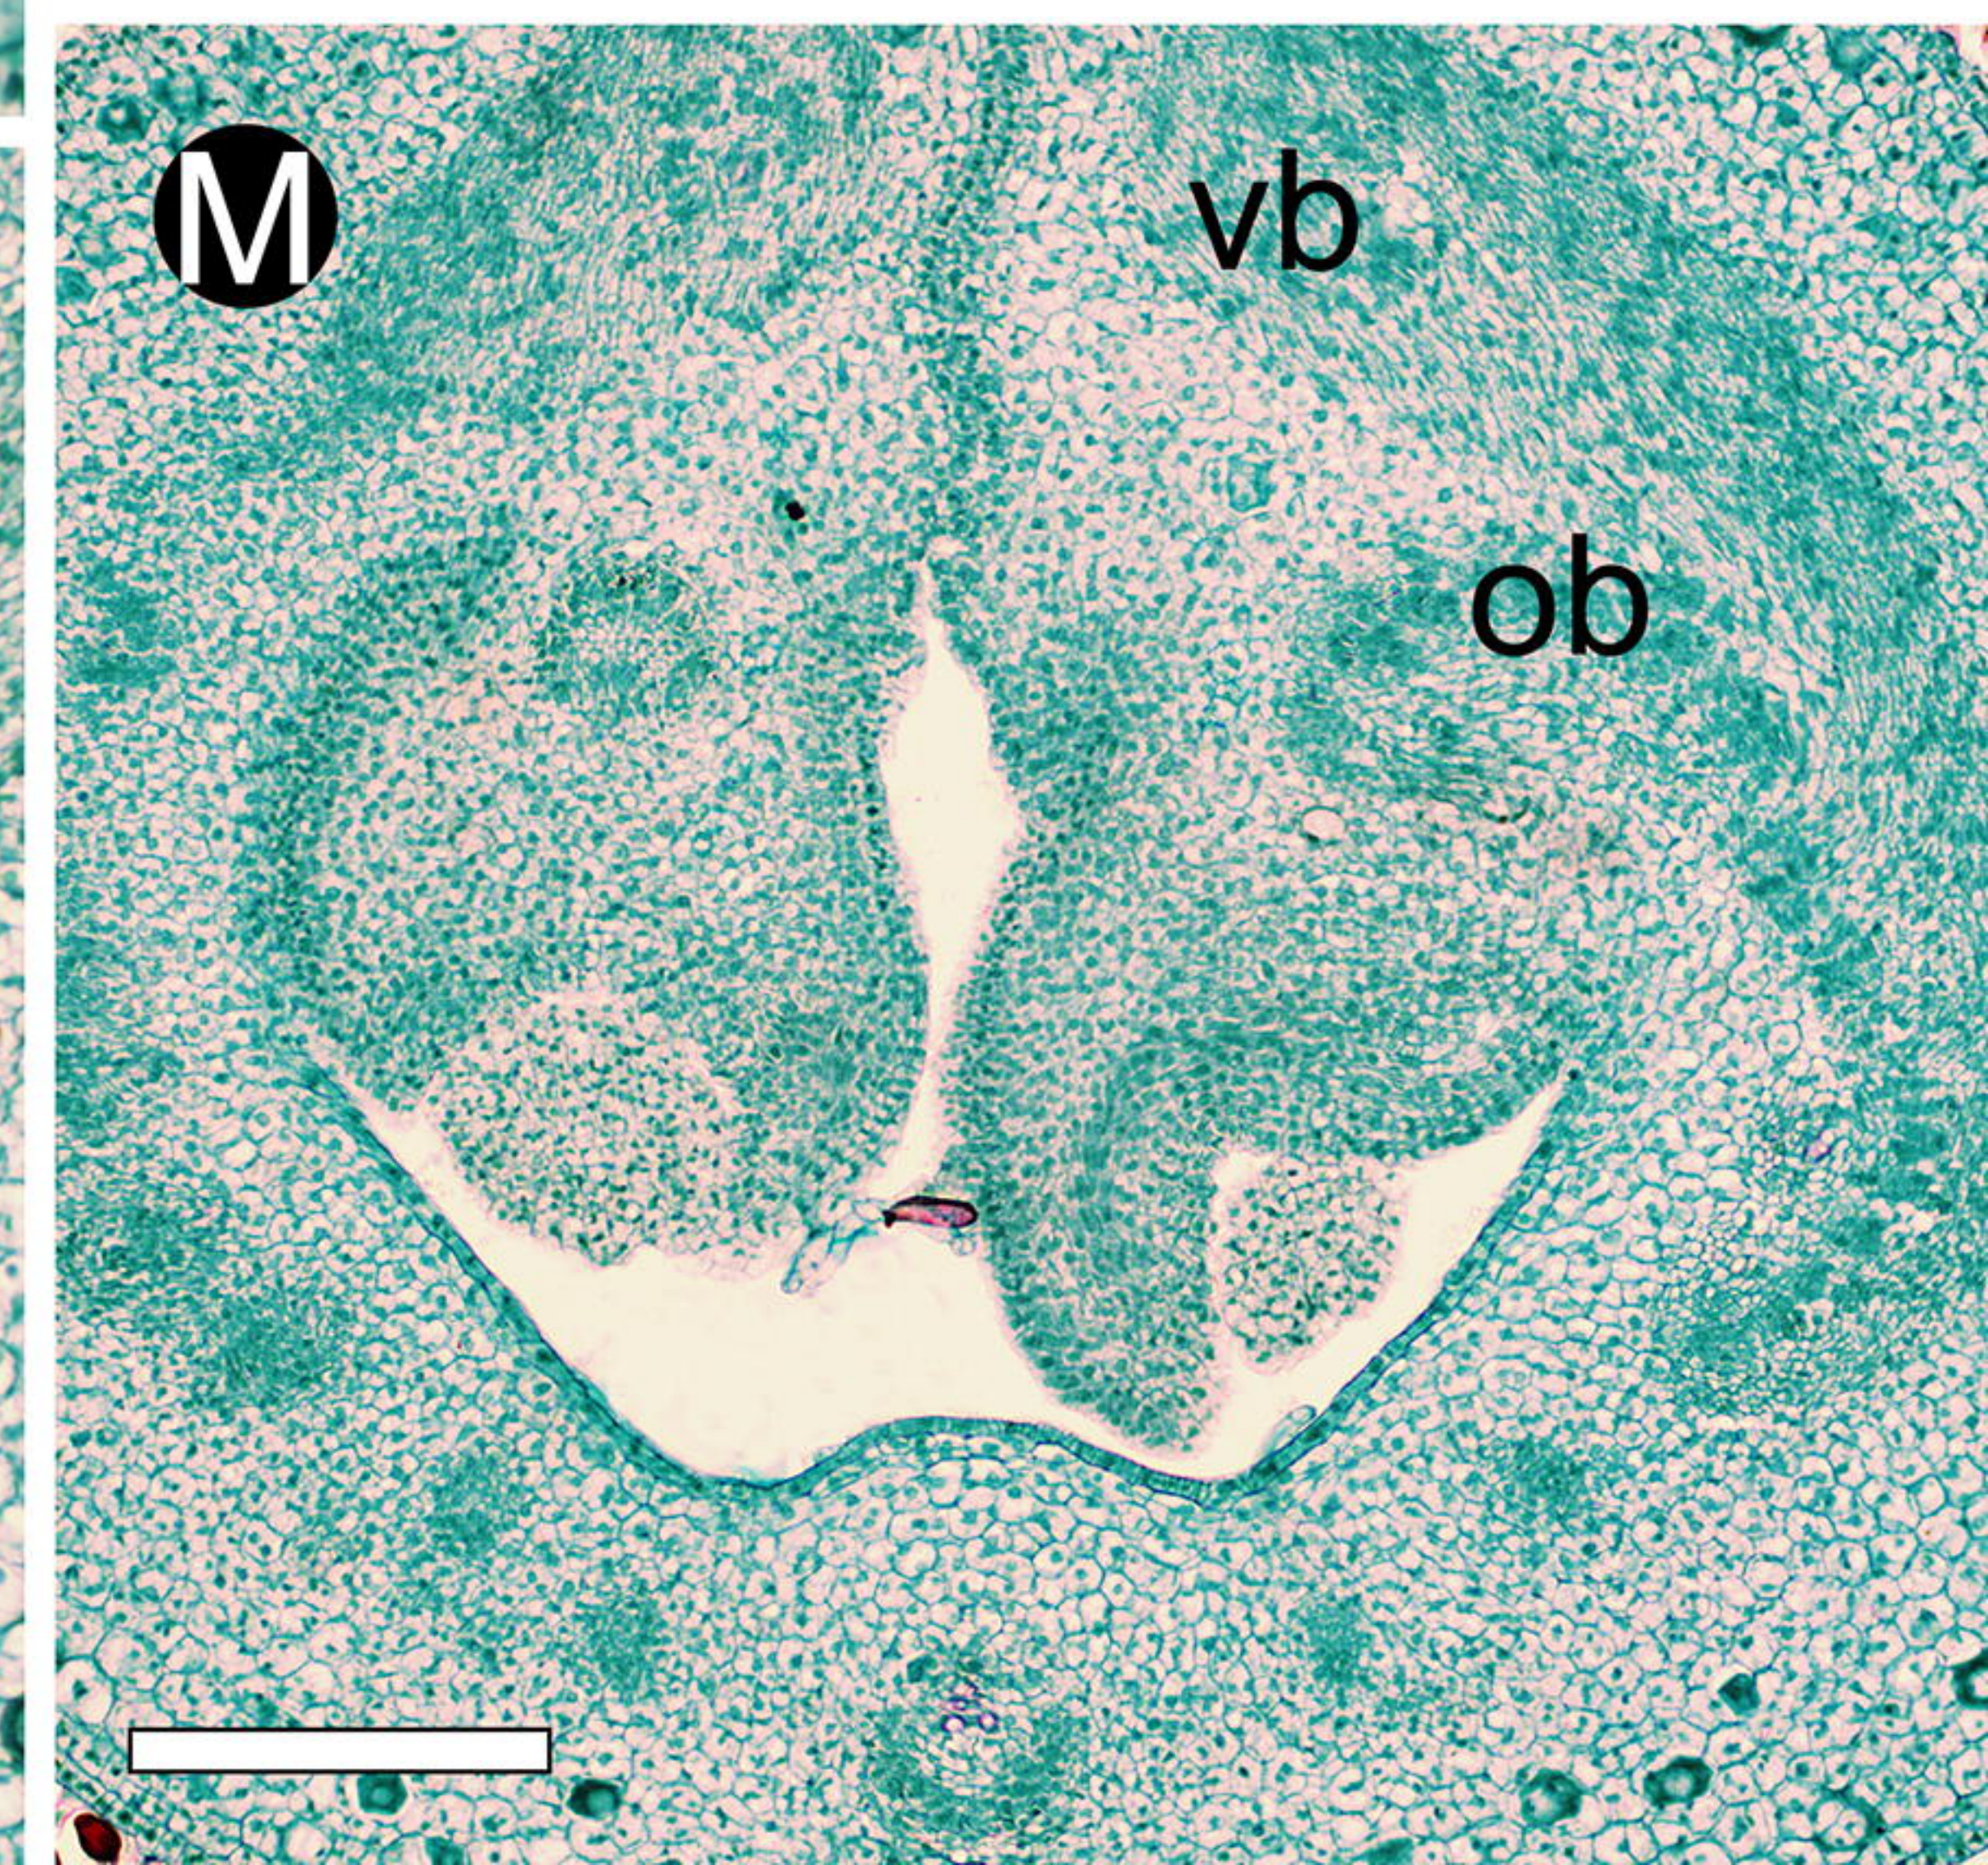



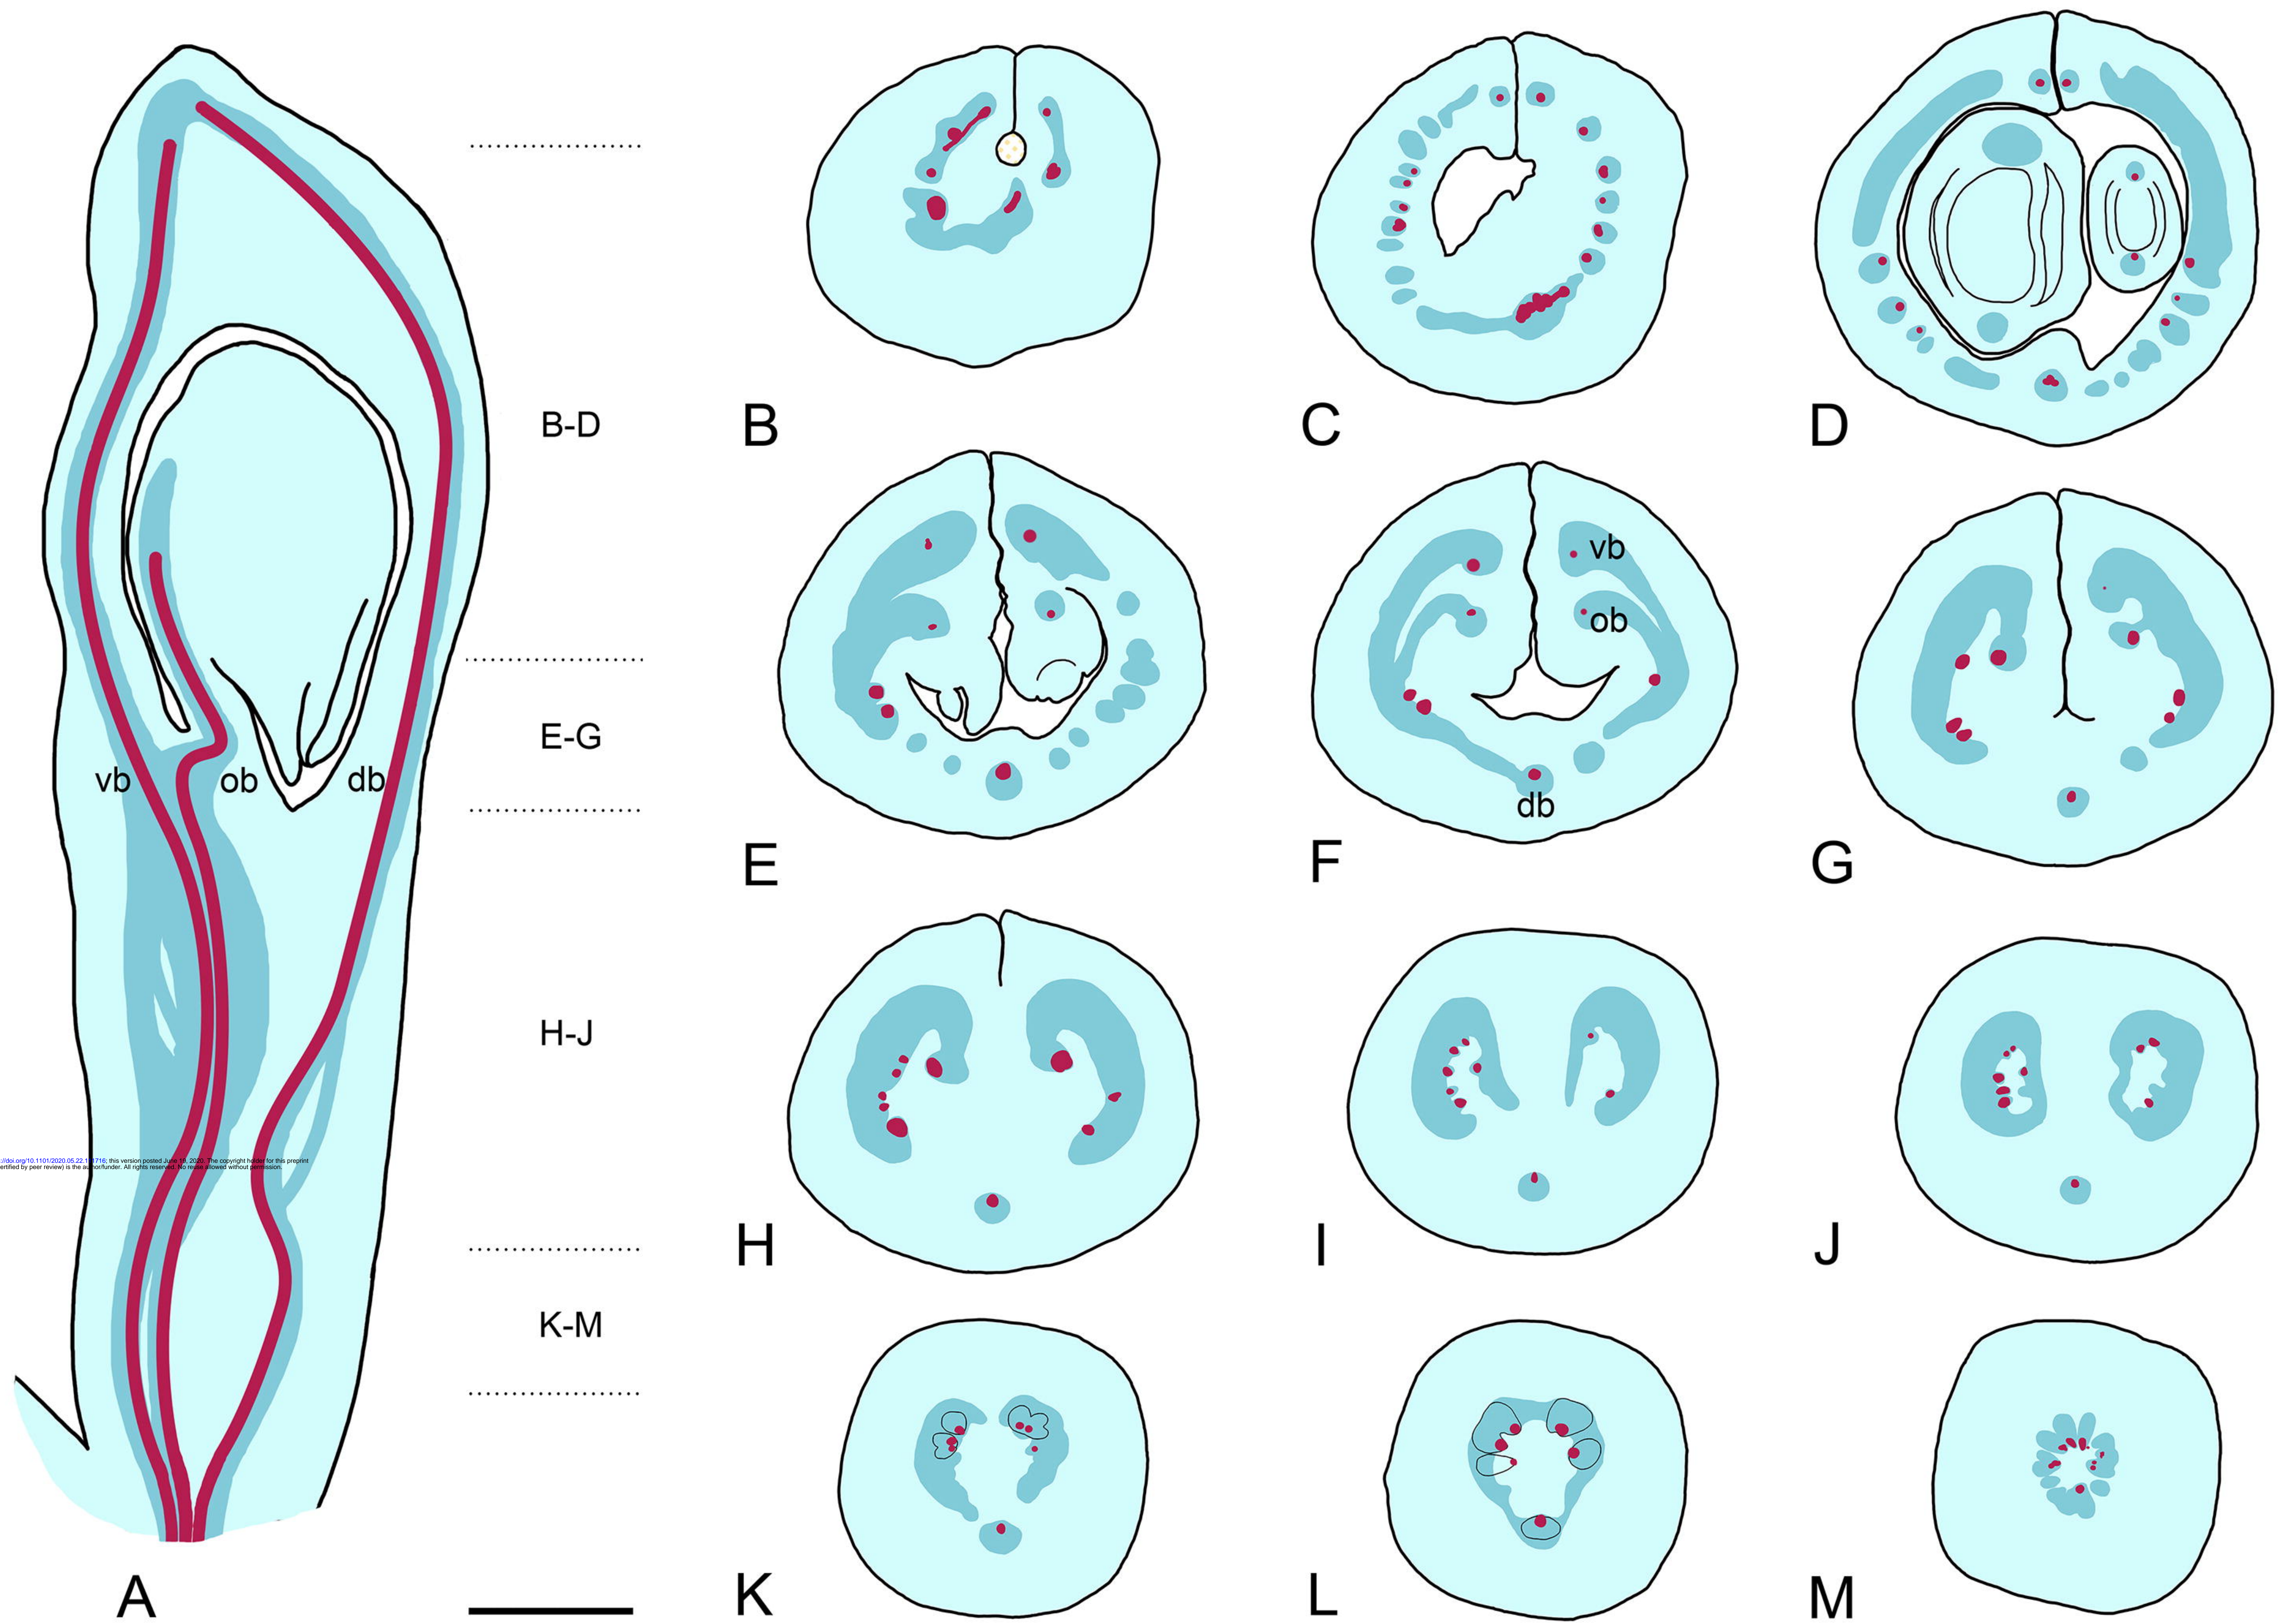

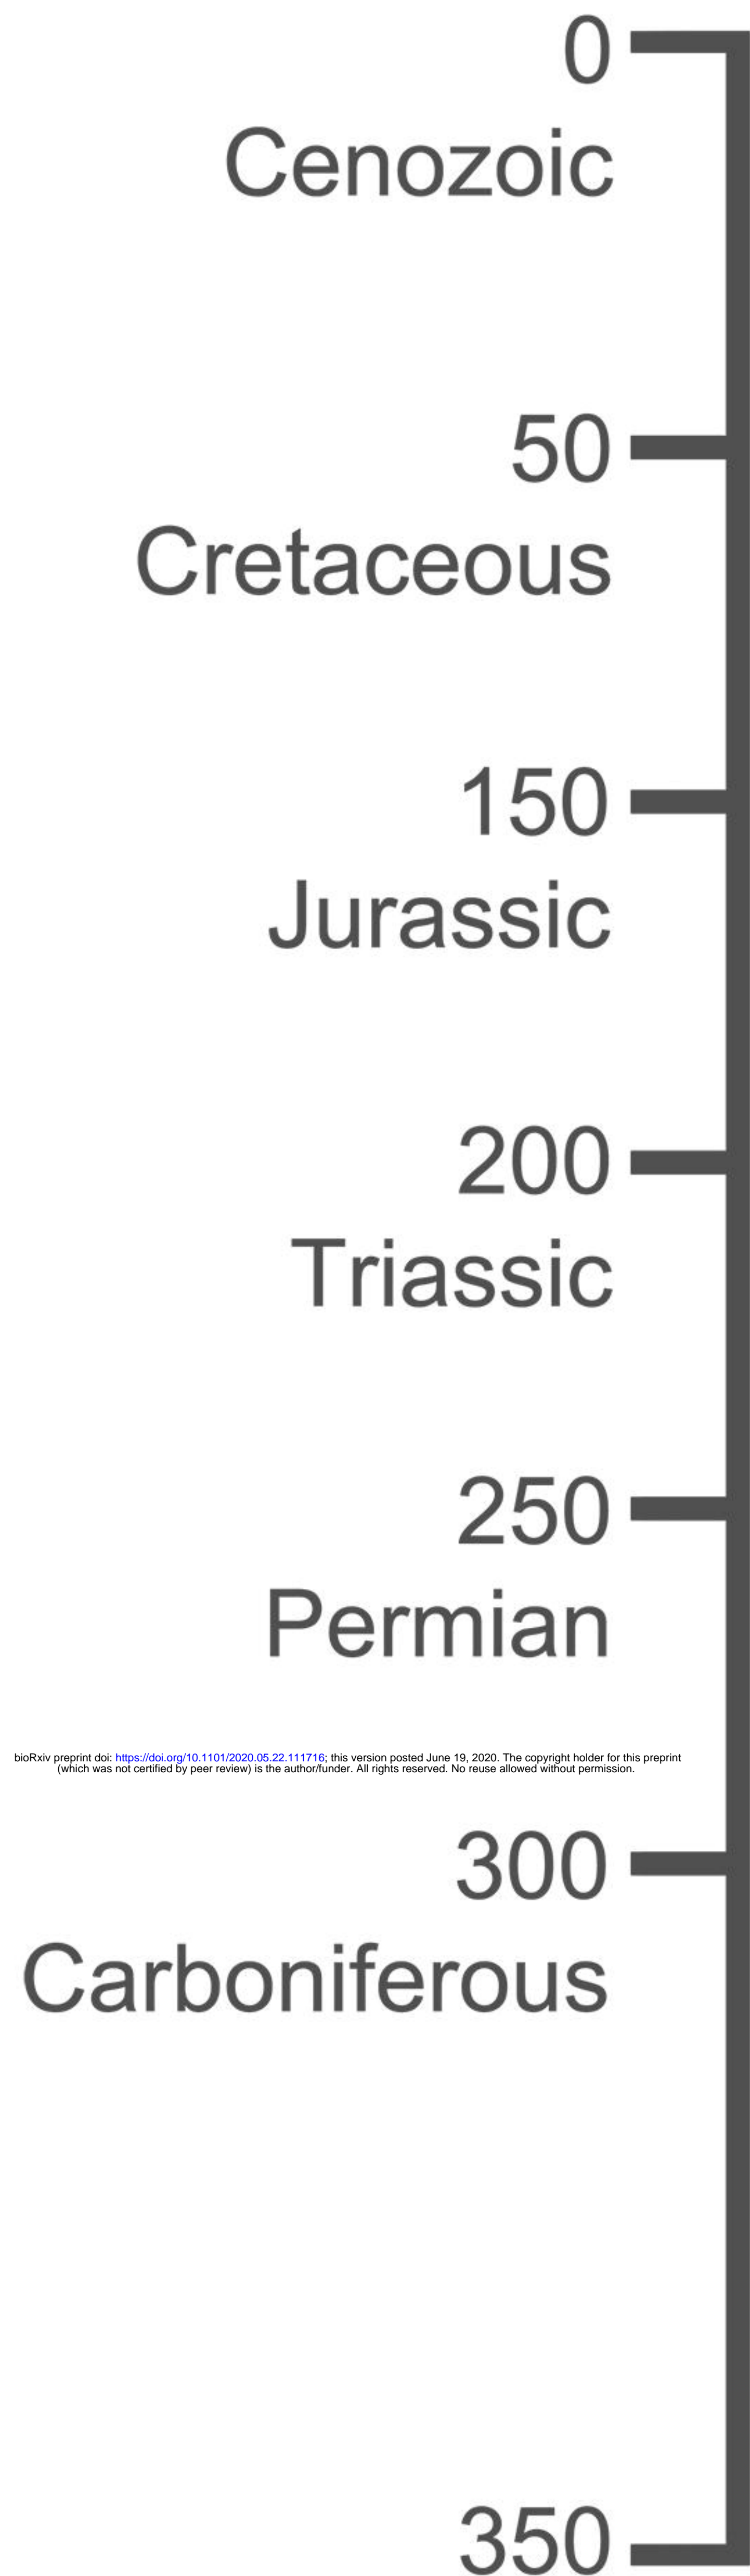

Conifers

Gnetophytes

Angiosperms

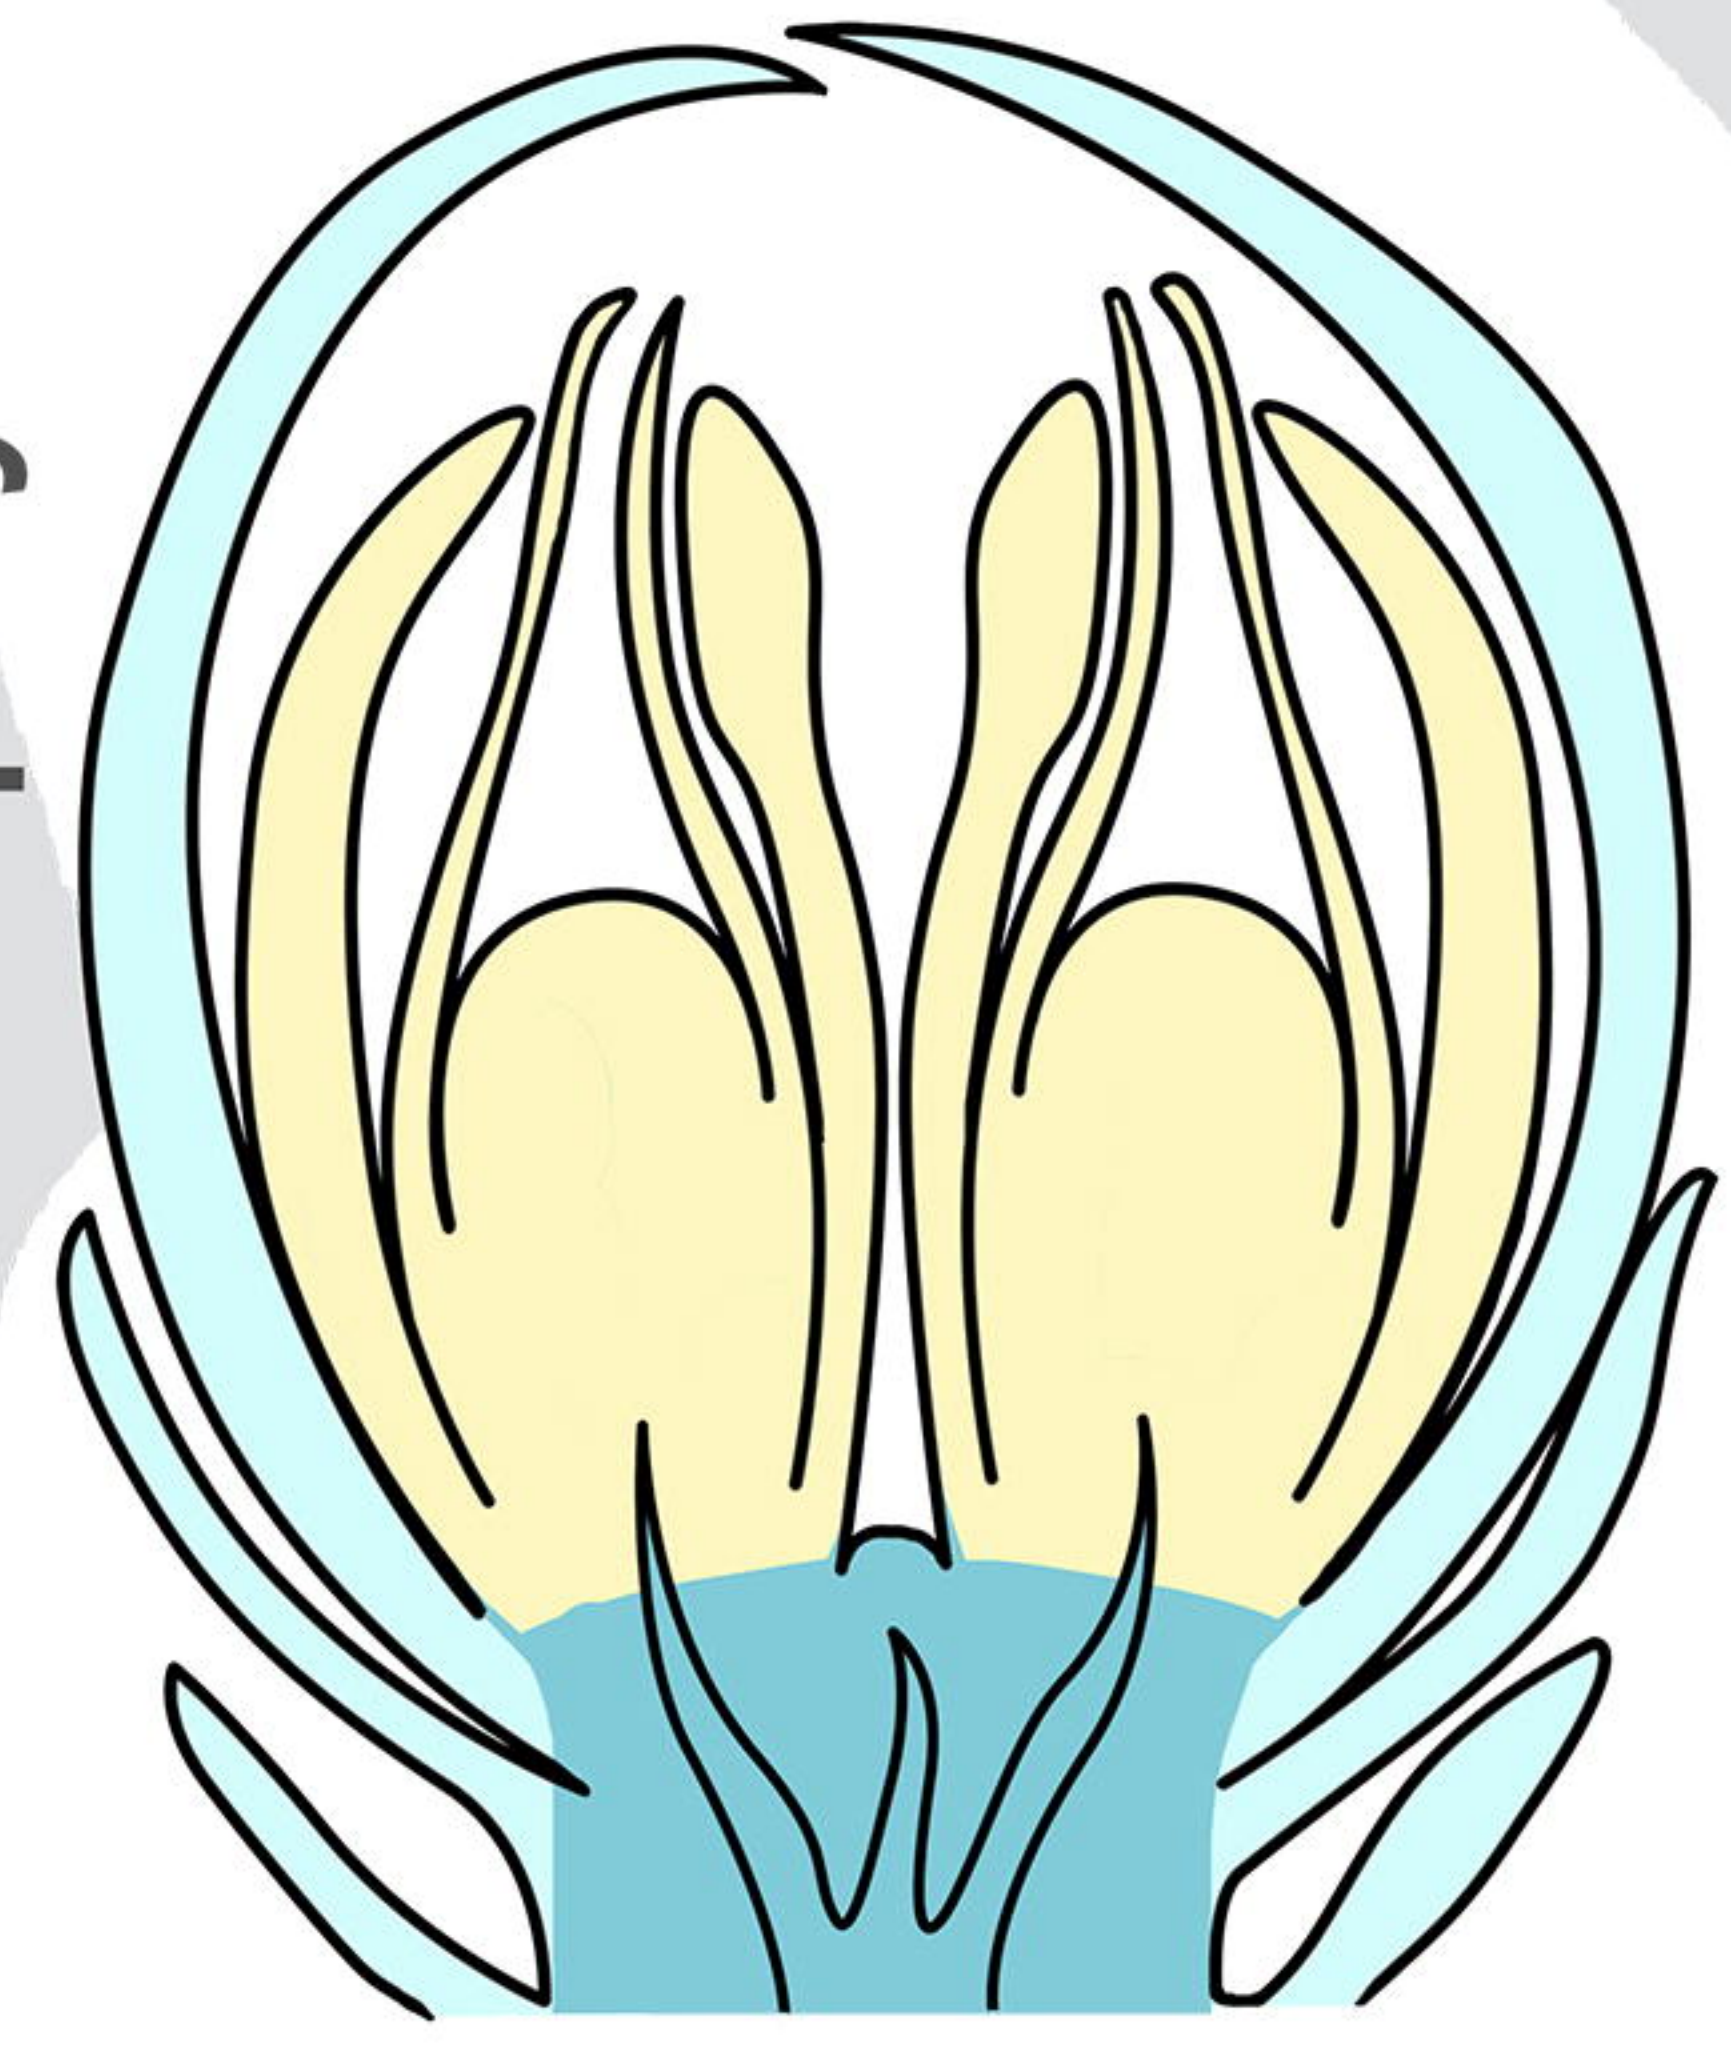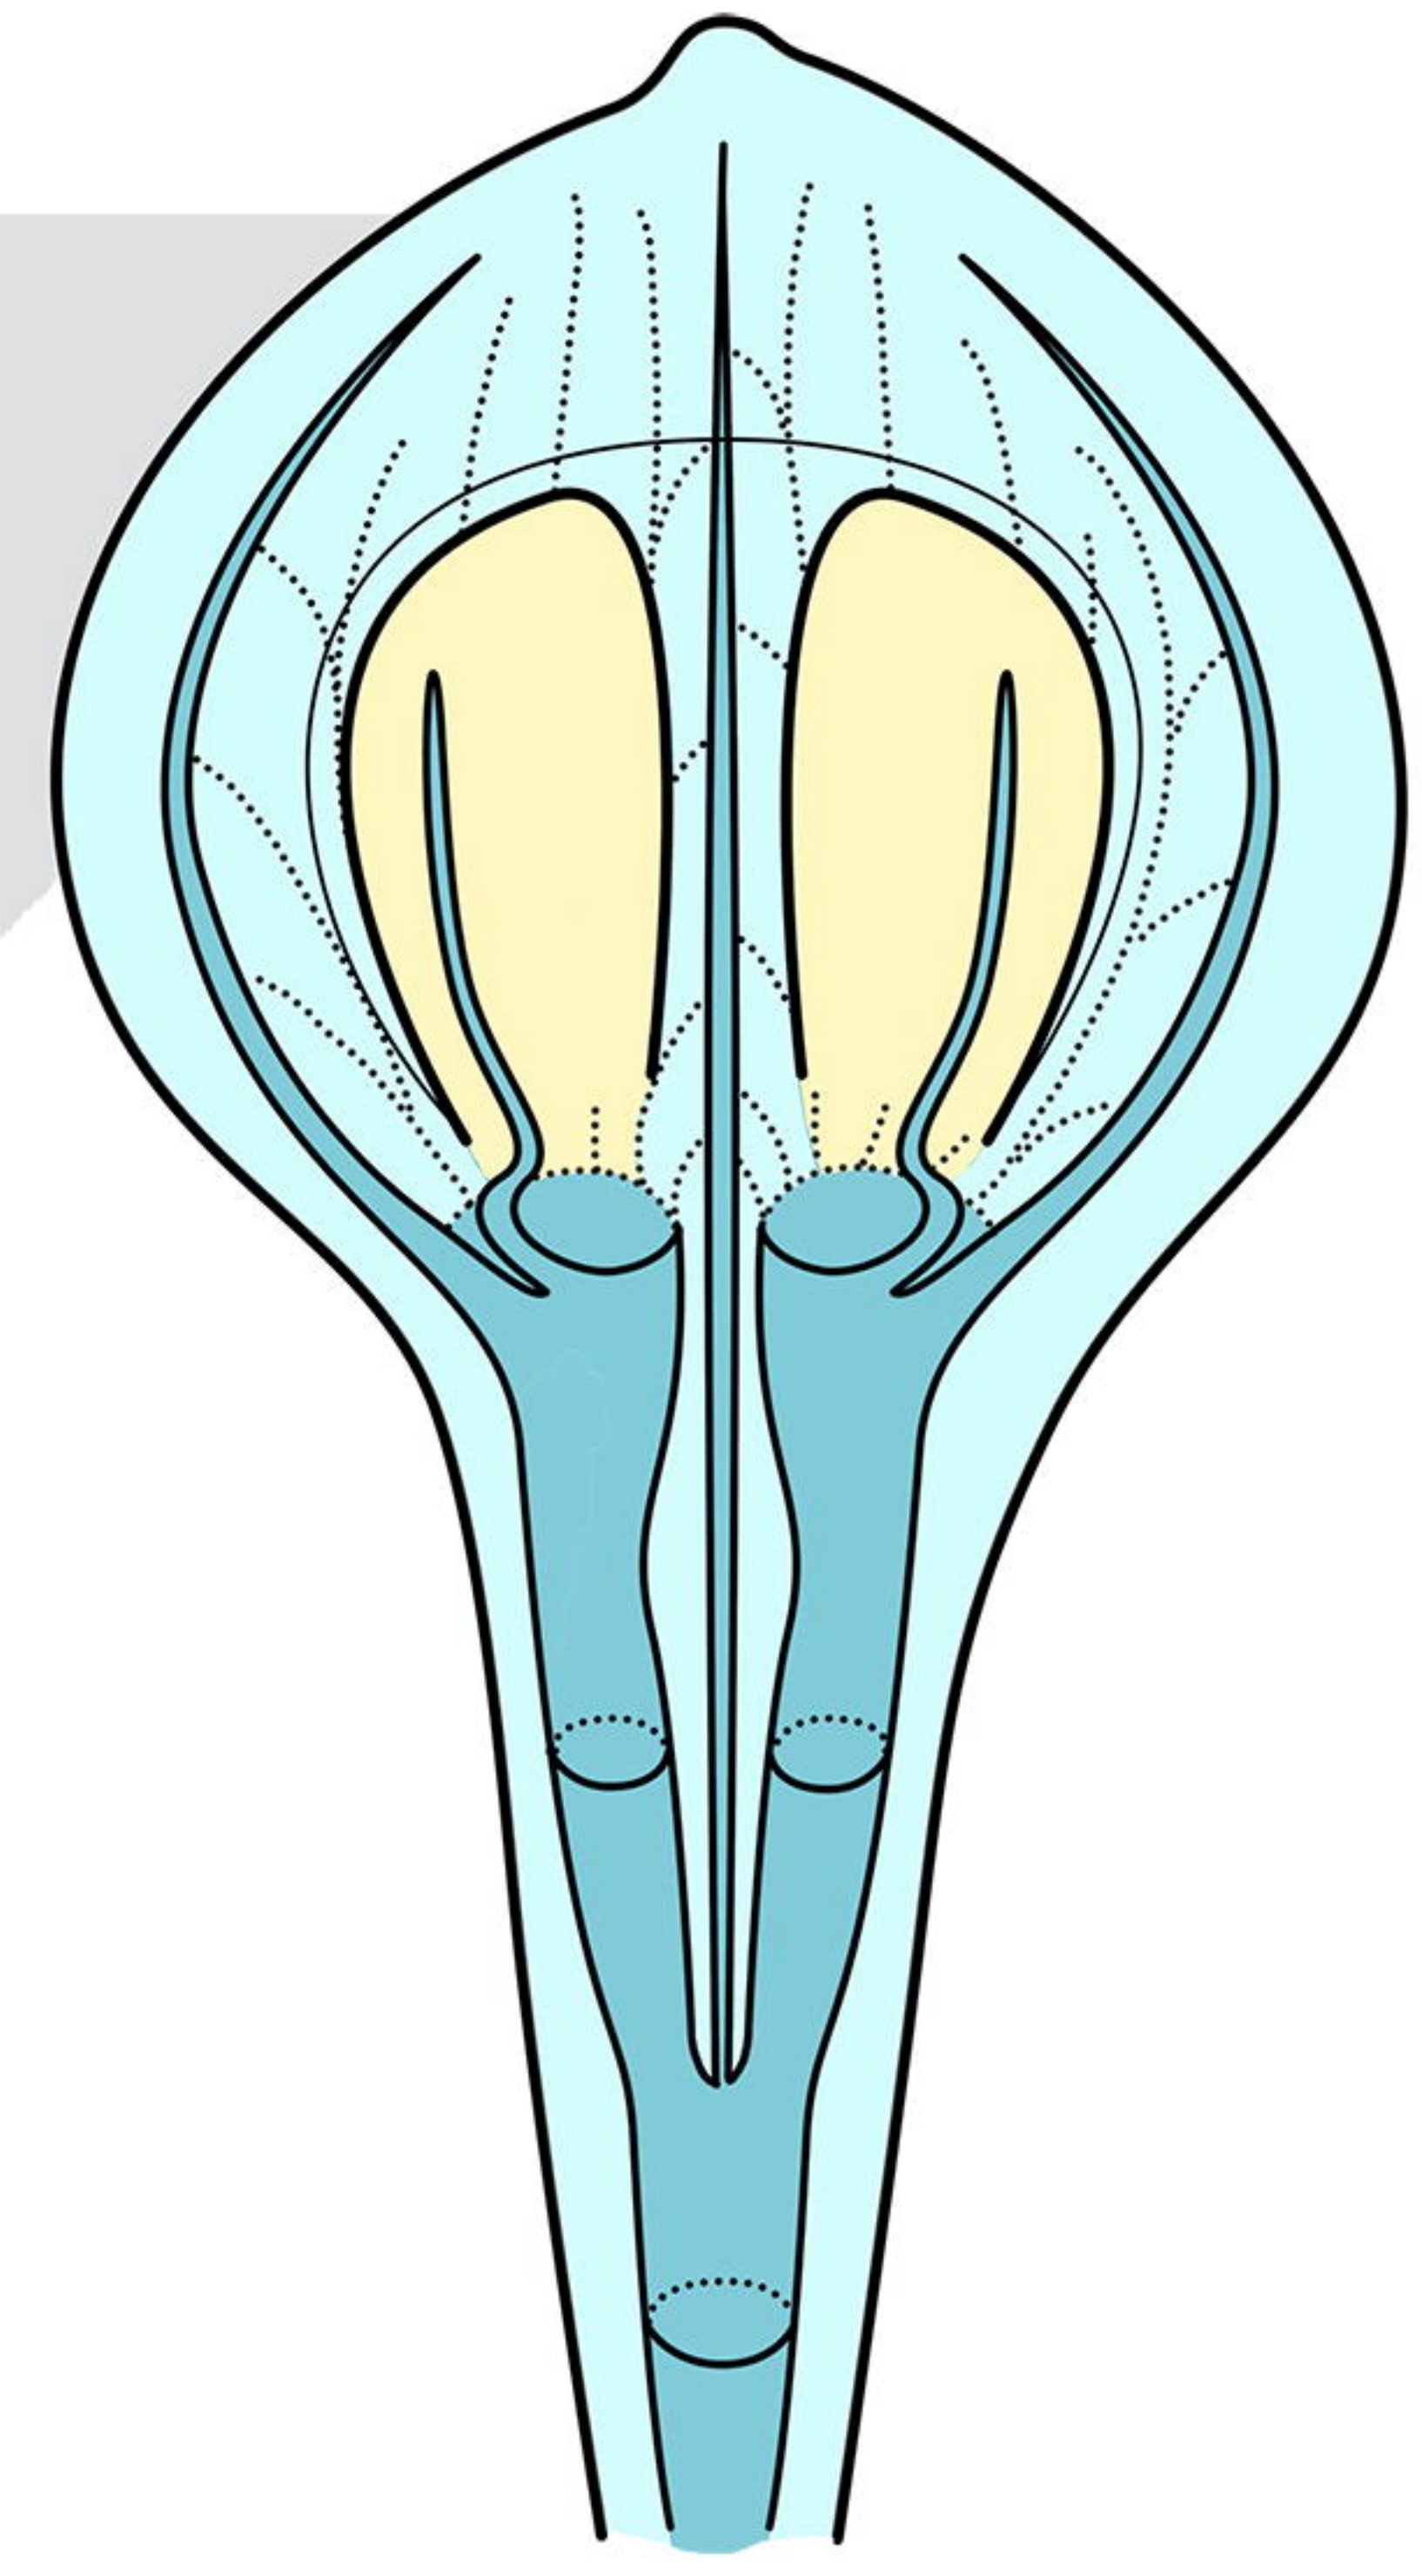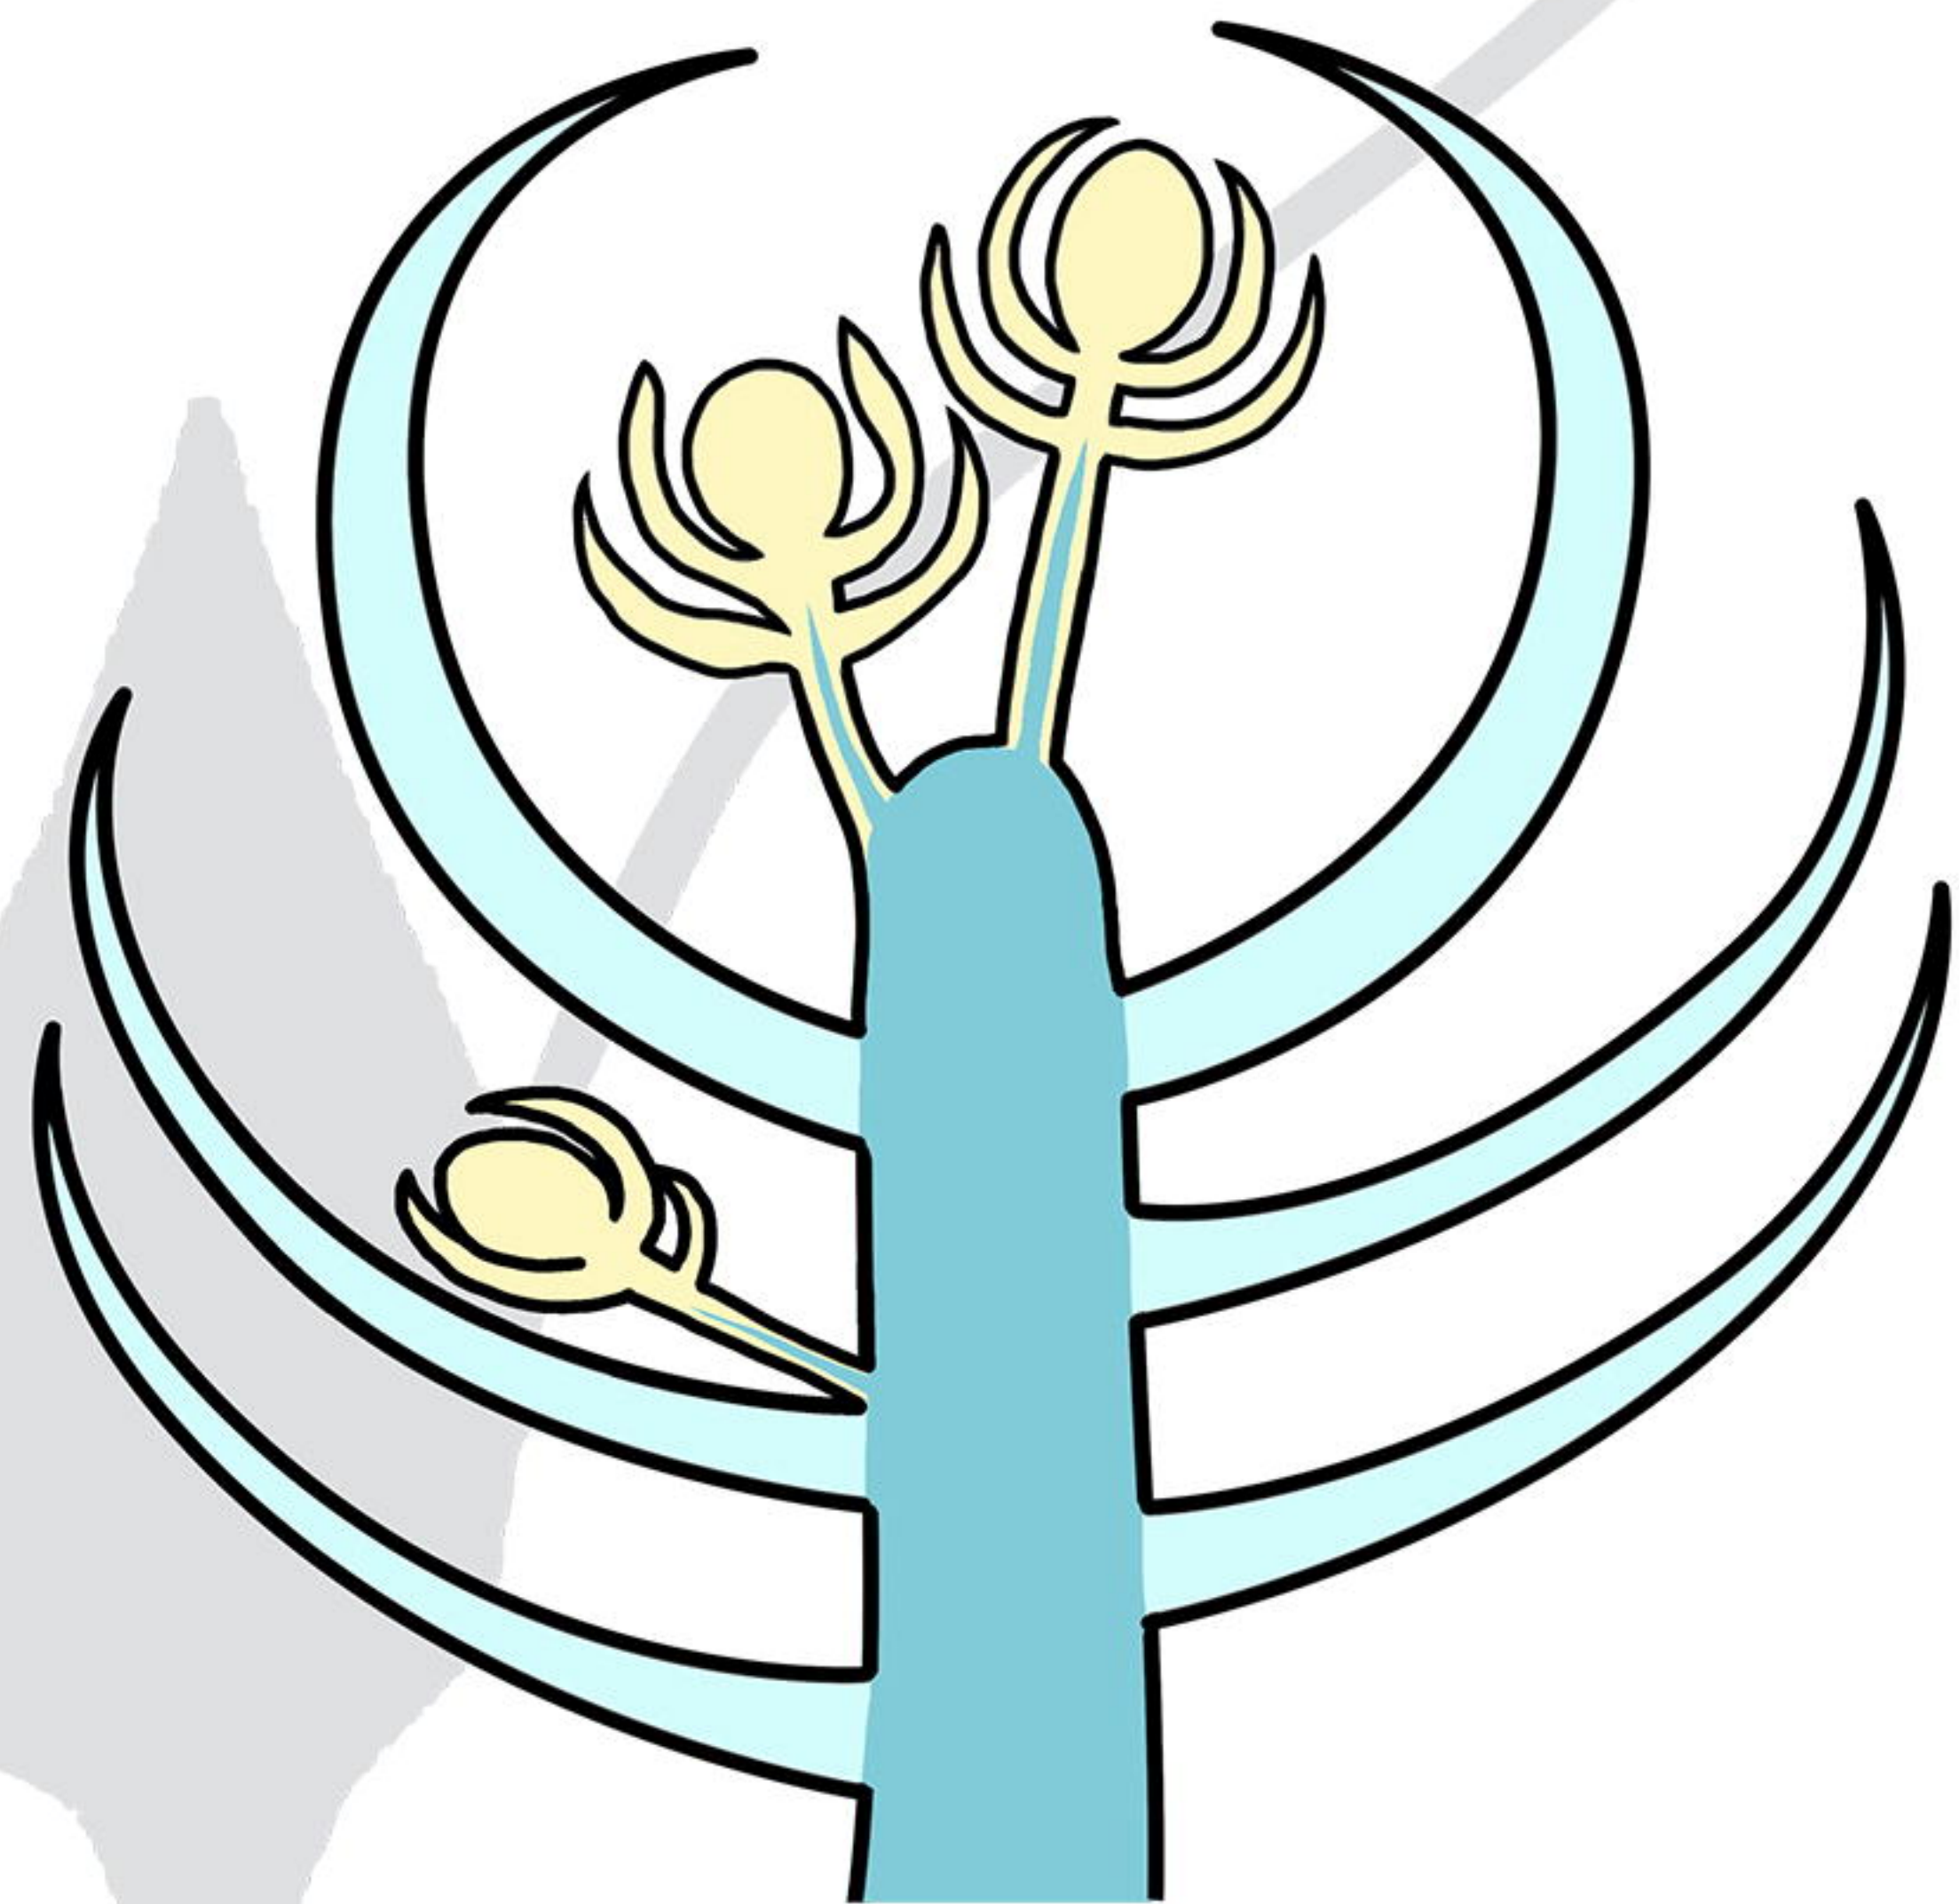

- ovule (with bracts)
- shoot homologs
- leaf homologs

bioRxiv preprint doi: <https://doi.org/10.1101/2020.06.22.117116>; this version posted June 18, 2020. The copyright holder for this preprint (which was not certified by peer review) is the author/funder. All rights reserved. No reuse allowed without permission.
